# Supplementary material for: Comparative genomic insights into ecological adaptations and evolutionary dynamics of Trebouxiophyceae algae
Source: Research Square preprint supplement (doi:10.21203/rs.3.rs-6242736/v1), 2025-04-16
Supplement: Supplementary file 1 [file 3099d2f87c01dee3a7622b93.docx]

| **Species** | **Assembled genome size (Mb)** | **N50 contig length (kp)** | **Number of scaffolds** | **N50 Scaffold length (kb)** | **Genome Complete BUSCOs** | **PEP sequnences Complete BUSCOs** | **Number of genes** | **GC (%)** | **Repeate (%)** | **Acession number** |
| --- | --- | --- | --- | --- | --- | --- | --- | --- | --- | --- |
| *Coccomyxa rayssiae* | 45.02 | 20.72 | 2188 | 20.72 | 97.90% | 86.60% | 7310 | 51.87 | 1.67 | SAMC4847390 |
| *Coccomyxa arvernensis* | 53.28 | 20.00 | 3969 | 20.00 | 95.90% | 88.60% | 7719 | 53.30 | 2.67 | SAMC4847389 |
| *Coccomyxa simplex* | 47.89 | 20.98 | 2404 | 20.98 | 97.20% | 88.00% | 7495 | 52.19 | 2.35 | SAMC4847391 |
| *Chlorella vulgaris* | 37.26 | 21.97 | 2433 | 21.97 | 97.30% | 83.60% | 7267 | 61.81 | 4.78 | SAMC4847387 |
| *Chlorella vulgaris* | 36.86 | 21.92 | 2707 | 21.92 | 95.90% | 81.10% | 7148 | 61.82 | 4.77 | SAMC4847388 |
| *Chlorella pyrenoidosa* | 37.20 | 21.87 | 2754 | 21.87 | 96.30% | 81.80% | 7179 | 61.79 | 5.04 | SAMC4847386 |
| *Chlorella variabilis* | 46.16 | 27.94 | 414 | 1469.61 | 80.00% | 95.50% | 9780 | 67.14 | 5.37 | GCA_000147415 |
| *Helicosporidium* sp. | 12.37 | 3.04 | 0 | 0.00 | 99.20% | 76.00% | 6033 | 61.69 | 1.83 | GCA_000690575 |
| *Micractinium conductrix* | 60.77 | 1210.50 | 0 | 0.00 | 96.60% | 96.70% | 9217 | 67.20 | 15.65 | GCA_002245815 |
| *Auxenochlorella protothecoides* | 21.08 | 27.19 | 215 | 639.90 | 88.20% | 90.40% | 5852 | 63.05 | 1.93 | GCA_003709365 |
| *Trebouxia* sp. A1-2 | 52.90 | 151.52 | 217 | 848.26 | 97.00% | 89.40% | 13851 | 49.99 | 6.86 | GCA_008636185 |
| *Coccomyxa* sp. Obi | 50.16 | 2738.30 | 19 | 2738.30 | 99.10% | 98.90% | 11746 | 52.21 | 4.45 | GCA_020887355 |
| *Chlorella vulgaris* | 40.18 | 1802.18 | 43 | 2825.14 | 98.60% | 99.10% | 10809 | 61.60 | 8.38 | GCA_023343905 |
| *Chlorella ohadii* | 57.09 | 31.68 | 486 | 328.98 | 92.70% | 96.70% | 10866 | 63.85 | 1.49 | GCA_025026875 |
| *Picochlorum* sp. BPE23 | 14.82 | 1257.60 | 0 | 0.00 | 92.90% | 95.80% | 7227 | 46.19 | 10.68 | GCA_025209345 |
| *Picochlorum* sp. BPE23 | 13.44 | 1109.38 | 0 | 0.00 | 87.70% | 96.10% | 7020 | 46.19 | 5.46 | GCA_025209375 |
| *Prototheca wickerhamii* | 17.20 | 1505.40 | 0 | 0.00 | 25.20% | 81.50% | 5529 | 63.54 | 3.31 | GCA_031763795 |
| *Picochlorum* sp. SENEW3 | 4.09 | 1279.57 | 3 | 1279.57 | 92.20% | 25.90% | 1791 | 46.41 | 7.31 | GCA_034226045 |
| *Picochlorum* sp. SENEW3 | 13.74 | 1129.63 | 12 | 1129.63 | 93.40% | 92.20% | 6553 | 46.20 | 4.90 | GCA_034226945 |
| *Elliptochloris bilobata* | 52.25 | 568.15 | 145 | 616.92 | 92.70% | 94.90% | 8704 | 59.99 | 3.78 | GCA_040144335 |
| *Apatococcus lobatus* | 106.45 | 1454.37 | 153 | 2718.22 | 76.60% | 96.10% | 11126 | 51.49 | 19.73 | GCA_040144355 |
| *Apatococcus fuscideae* | 102.68 | 47.18 | 2319 | 50.92 | 97.20% | 78.30% | 12478 | 52.58 | 9.89 | GCA_040144375 |
| *Myrmecia bisecta* | 83.48 | 4125.35 | 38 | 4668.23 | 89.70% | 97.80% | 12567 | 56.46 | 7.76 | GCA_040144395 |
| *Symbiochloris irregularis* | 65.27 | 200.33 | 340 | 306.21 | 96.70% | 92.50% | 10940 | 53.54 | 5.51 | GCA_040144405 |
| *Coccomyxa subellipsoidea* | 50.92 | 2655.88 | 26 | 3015.57 | 95.00% | 96.40% | 10048 | 52.47 | 6.59 | GCA_040182555 |
| *Trebouxia* sp. C0004 | 70.86 | 824.89 | 183 | 908.51 | 94.50% | 97.20% | 12738 | 49.70 | 17.01 | GCA_040206735 |
| *Trebouxia* sp. C0006 | 68.28 | 2877.22 | 0 | 0.00 | 94.60% | 96.30% | 11753 | 49.70 | 10.14 | GCA_040206745 |
| *Trebouxia* sp. C0005 | 62.22 | 673.86 | 196 | 801.50 | 94.80% | 95.20% | 11141 | 49.96 | 10.31 | GCA_040206755 |
| *Coccomyxa* *viridis* | 45.73 | 2525.12 | 0 | 0.00 | 95.00% | 97.40% | 11248 | 55.54 | 2.39 | GCA_963575595 |
| *Coccomyxa* *viridis* | 50.91 | 2386.94 | 21 | 2669.02 | 96.70% | 98.60% | 11845 | 54.46 | 3.07 | GCA_964019345 |
| *Coccomyxa* *elongata* | 51.39 | 2614.17 | 21 | 2745.76 | 96.30% | 98.50% | 11898 | 52.46 | 5.50 | GCA_964261555 |
| *Coccomyxa* *subellipsoidea* C-169 | 48.83 | 1959.57 | 0 | 0.00 |  | 98.90% | 9915 | 52.94 | 5.22 | GCF_000258705 |

Table 1 Comparison of draft genome assemblies of 6 species of Trebouxiophyceae algae according with the 25 referred genomes in this group.
