# Supplementary material for: Comparative genomic insights into ecological adaptations and evolutionary dynamics of Trebouxiophyceae algae
Source: Research Square preprint supplement (doi:10.21203/rs.3.rs-6242736/v1), 2025-04-16
Supplement: Supplementary file 2 [file db2056ddf241547ac7c1cc3a.xlsx]

## Sheet: Supplementary table1
ID	Description	pvalue	p.adjust	qvalue	geneID	Count
GO:0004114	"3',5'-cyclic-nucleotide phosphodiesterase activity"	9.56e-09	1.34e-07	5.03e-08	GCA_000143455.1_EFJ52552.1/GCA_002284615.2_KAF5828526.1/GCA_002284615.2_KAF5832352.1/KAI8105982.1_GCA_025209345/KAI8106598.1_GCA_025209375/KAK9834525.1_GCA_040144355/KAK9838952.1_GCA_040144355/KAK9865245.1_GCA_040144375/KAK9805235.1_GCA_040144395/KAK9805236.1_GCA_040144395/KAL0046527.1_GCA_040206745/CAL8464523.1_GCA_964261555	12	molecular_function
GO:0000184	"nuclear-transcribed mRNA catabolic process, nonsense-mediated decay"	5.04e-06	2.77e-05	1.04e-05	GCA_000143455.1_EFJ52298.1/KAI8101735.1_GCA_025209345/KAI8102987.1_GCA_025209345/KAI8102266.1_GCA_025209375/KAI8103520.1_GCA_025209375	5	biological_process
GO:0016627	"oxidoreductase activity, acting on the CH-CH group of donors"	0.00599571	0.0137204	0.00515803	D2010028365_2_rna-gnl|jgi|COCSUDRAFT_mRNA52469_R0/D2010028366_2_rna-gnl|jgi|COCSUDRAFT_mRNA52469_R0/D2105061953_1_rna-CHLNCDRAFT_36152_R0/D2203116319_2_rna-gnl|jgi|COCSUDRAFT_mRNA52469_R0/GCA_002284615.2_KAF5841552.1/KAI8108423.1_GCA_025209345/KAI8109096.1_GCA_025209375	7	molecular_function
GO:0003848	2-amino-4-hydroxy-6-hydroxymethyldihydropteridine diphosphokinase activity	1.04e-10	2.04e-09	7.68e-10	GCA_002284615.2_KAF5842524.1/RMZ52400.1_GCA_003709365/KAI8103043.1_GCA_025209345/KAI8103583.1_GCA_025209375/WPT16652.1_GCA_034226945/KAK9817552.1_GCA_040144355/KAK9865852.1_GCA_040144375	7	molecular_function
GO:0009452	7-methylguanosine RNA capping	0.00956306	0.0199778	0.00751045	KAI8109913.1_GCA_025209345/KAI8111936.1_GCA_025209375/KAL0029527.1_GCA_040206755	3	biological_process
GO:0003989	acetyl-CoA carboxylase activity	9.14e-06	4.27e-05	1.6e-05	KAI8111027.1_GCA_025209345/KAI8107661.1_GCA_025209375/KAK9861852.1_GCA_040144375/KAK9805253.1_GCA_040144395/KAK9805254.1_GCA_040144395	5	molecular_function
GO:0003993	acid phosphatase activity	4.7e-16	4.61e-14	1.73e-14	D2010028365_2_rna-gnl|jgi|COCSUDRAFT_mRNA48521_R0/D2010028366_2_rna-gnl|jgi|COCSUDRAFT_mRNA48521_R0/D2203116319_2_rna-gnl|jgi|COCSUDRAFT_mRNA48521_R0/RMZ52918.1_GCA_003709365/KAI8105554.1_GCA_025209345/KAI8108134.1_GCA_025209345/KAI8108135.1_GCA_025209345/KAI8111208.1_GCA_025209345/KAI8112115.1_GCA_025209345/KAI8112671.1_GCA_025209345/KAI8113937.1_GCA_025209345/KAI8103798.1_GCA_025209375/KAI81061…	18	molecular_function
GO:0003997	acyl-CoA oxidase activity	2.31e-05	9.42e-05	3.54e-05	D2010028365_2_rna-gnl|jgi|COCSUDRAFT_mRNA52469_R0/D2010028366_2_rna-gnl|jgi|COCSUDRAFT_mRNA52469_R0/D2105061953_1_rna-CHLNCDRAFT_36152_R0/D2203116319_2_rna-gnl|jgi|COCSUDRAFT_mRNA52469_R0/KAI8108423.1_GCA_025209345/KAI8109096.1_GCA_025209375	6	molecular_function
GO:0004813	alanine-tRNA ligase activity	2.07e-07	2.26e-06	8.48e-07	KAA6428526.1_GCA_008636185/KAI8100990.1_GCA_025209345/KAI8101519.1_GCA_025209375/KAK2078524.1_GCA_031763795/KAK9901524.1_GCA_040182555/CAK0787152.1_GCA_963575595	6	molecular_function
GO:0006419	alanyl-tRNA aminoacylation	2.07e-07	2.26e-06	8.48e-07	KAA6428526.1_GCA_008636185/KAI8100990.1_GCA_025209345/KAI8101519.1_GCA_025209375/KAK2078524.1_GCA_031763795/KAK9901524.1_GCA_040182555/CAK0787152.1_GCA_963575595	6	biological_process
GO:0004045	aminoacyl-tRNA hydrolase activity	1.47e-06	1.11e-05	4.15e-06	KAI8106015.1_GCA_025209345/KAI8110869.1_GCA_025209345/KAI8106632.1_GCA_025209375/KAI8107507.1_GCA_025209375/KAL0052223.1_GCA_040206745/KAL0052224.1_GCA_040206745/XP_005643552.1_GCF_000258705	7	molecular_function
GO:0003876	AMP deaminase activity	8.85e-07	7.88e-06	2.96e-06	KAI8111068.1_GCA_025209345/KAI8107700.1_GCA_025209375/KAL0025212.1_GCA_040206735/KAL0055274.1_GCA_040206745/CAL0297552.1_GCA_964019345	5	molecular_function
GO:0042626	ATPase-coupled transmembrane transporter activity	0.00902698	0.0199778	0.00751045	KAI8105725.1_GCA_025209345/KAI8106339.1_GCA_025209375	2	molecular_function
GO:0140662	ATP-dependent protein folding chaperone	0.016935	0.0313138	0.0117721	D2010028353_2_rna-gnl|WGS_LHPF|mrna.C2E20_3552_R0/D2105061953_2_rna-gnl|WGS_LHPF|mrna.C2E20_3552_R0/D2203116305_2_rna-gnl|WGS_LHPF|mrna.C2E20_3552_R0/EFN52806.1_GCA_000147415/KAI8114251.1_GCA_025209345/KAI8104112.1_GCA_025209375	6	molecular_function
GO:0006914	autophagy	0.0208423	0.036474	0.013712	KAI3426852.1_GCA_023343905/KAI8104803.1_GCA_025209345/KAI8105396.1_GCA_025209375	3	biological_process
GO:0006821	chloride transport	0.0125829	0.0246625	0.00927161	KAI8104515.1_GCA_025209345/KAI8105116.1_GCA_025209375/WPT15279.1_GCA_034226945/KAK9915237.1_GCA_040182555	4	biological_process
GO:0010277	chlorophyllide a oxygenase [overall] activity	0.0152864	0.0293738	0.0110428	GCA_000143455.1_EFJ52402.1/KAI3424952.1_GCA_023343905/CAL8465289.1_GCA_964261555/CAL8469852.1_GCA_964261555	4	molecular_function
GO:0019239	deaminase activity	8.01e-05	0.000270526	0.000101702	KAI8111068.1_GCA_025209345/KAI8107700.1_GCA_025209375/KAL0025212.1_GCA_040206735/KAL0055274.1_GCA_040206745/CAL0297552.1_GCA_964019345	5	molecular_function
GO:0000731	DNA synthesis involved in DNA repair	1.64e-05	7.3e-05	2.74e-05	KDD75247.1_GCA_000690575/KAI8112503.1_GCA_025209345/KAI8113398.1_GCA_025209375/KAL0035225.1_GCA_040206755	4	biological_process
GO:0030286	dynein complex	6.66e-06	3.26e-05	1.23e-05	GCA_000143455.1_EFJ52606.1/GCA_000143455.1_EFJ52773.1/GCA_002284615.2_KAF5843852.1/KAI8113931.1_GCA_025209345/KAI8103793.1_GCA_025209375/KAK9833525.1_GCA_040144335/KAK9815239.1_GCA_040144395/KAL0025212.1_GCA_040206735	8	cellular_component
GO:0004519	endonuclease activity	0.0160149	0.0301819	0.0113466	KAA6426052.1_GCA_008636185/KAI8110943.1_GCA_025209345/KAI8107580.1_GCA_025209375/KAL0052148.1_GCA_040206745	4	molecular_function
GO:0006635	fatty acid beta-oxidation	2.31e-05	9.42e-05	3.54e-05	D2010028365_2_rna-gnl|jgi|COCSUDRAFT_mRNA52469_R0/D2010028366_2_rna-gnl|jgi|COCSUDRAFT_mRNA52469_R0/D2105061953_1_rna-CHLNCDRAFT_36152_R0/D2203116319_2_rna-gnl|jgi|COCSUDRAFT_mRNA52469_R0/KAI8108423.1_GCA_025209345/KAI8109096.1_GCA_025209375	6	biological_process
GO:0006633	fatty acid biosynthetic process	0.0200812	0.035781	0.0134515	KAI8111027.1_GCA_025209345/KAI8107661.1_GCA_025209375/KAK9861852.1_GCA_040144375/KAK9805253.1_GCA_040144395/KAK9805254.1_GCA_040144395	5	biological_process
GO:0009396	folic acid-containing compound biosynthetic process	1.04e-10	2.04e-09	7.68e-10	GCA_002284615.2_KAF5842524.1/RMZ52400.1_GCA_003709365/KAI8103043.1_GCA_025209345/KAI8103583.1_GCA_025209375/WPT16652.1_GCA_034226945/KAK9817552.1_GCA_040144355/KAK9865852.1_GCA_040144375	7	biological_process
GO:0009378	four-way junction helicase activity	2.98e-06	1.95e-05	7.32e-06	KAI8100678.1_GCA_025209345/KAI8102827.1_GCA_025209345/KAI8108496.1_GCA_025209345/KAI8112781.1_GCA_025209345/KAI8101215.1_GCA_025209375/KAI8103361.1_GCA_025209375/KAI8109171.1_GCA_025209375/KAI8113687.1_GCA_025209375/KAK9845052.1_GCA_040144355/EFN52488.1_GCA_000147415/KAI8111144.1_GCA_025209345/KAI8107773.1_GCA_025209375	12	molecular_function
GO:0008184	glycogen phosphorylase activity	1.22e-12	5.98e-11	2.25e-11	D2010028365_2_rna-gnl|jgi|COCSUDRAFT_mRNA52379_R0/D2010028366_2_rna-gnl|jgi|COCSUDRAFT_mRNA52379_R0/EFN52286.1_GCA_000147415/EFN52353.1_GCA_000147415/KAI8106719.1_GCA_025209345/KAI8113919.1_GCA_025209345/KAI8103779.1_GCA_025209375/KAI8110095.1_GCA_025209375/KAI8110096.1_GCA_025209375/KAL0026522.1_GCA_040206735	10	molecular_function
GO:0004417	hydroxyethylthiazole kinase activity	0.00958119	0.0199778	0.00751045	KAI8109757.1_GCA_025209345/KAI8111777.1_GCA_025209375	2	molecular_function
GO:0032264	IMP salvage	8.85e-07	7.88e-06	2.96e-06	KAI8111068.1_GCA_025209345/KAI8107700.1_GCA_025209375/KAL0025212.1_GCA_040206735/KAL0055274.1_GCA_040206745/CAL0297552.1_GCA_964019345	5	biological_process
GO:0034755	iron ion transmembrane transport	5.09e-06	2.77e-05	1.04e-05	D2010028353_2_rna-gnl|WGS_LHPF|mrna.C2E20_3552_R0/D2105061953_2_rna-gnl|WGS_LHPF|mrna.C2E20_3552_R0/D2203116305_2_rna-gnl|WGS_LHPF|mrna.C2E20_3552_R0/EFN52807.1_GCA_000147415/KAI8114252.1_GCA_025209345/KAI8104113.1_GCA_025209375	6	biological_process
GO:0005381	iron ion transmembrane transporter activity	5.09e-06	2.77e-05	1.04e-05	D2010028353_2_rna-gnl|WGS_LHPF|mrna.C2E20_3552_R0/D2105061953_2_rna-gnl|WGS_LHPF|mrna.C2E20_3552_R0/D2203116305_2_rna-gnl|WGS_LHPF|mrna.C2E20_3552_R0/EFN52807.1_GCA_000147415/KAI8114252.1_GCA_025209345/KAI8104113.1_GCA_025209375	6	molecular_function
GO:0016853	isomerase activity	0.000954652	0.00267302	0.0010049	GCA_000143455.1_EFJ47252.1/RMZ52609.1_GCA_003709365/KAI8110933.1_GCA_025209345/KAI8107570.1_GCA_025209375/KAK9865279.1_GCA_040144375	5	molecular_function
GO:0070006	metalloaminopeptidase activity	0.000178498	0.000564283	0.000212136	KAI8102659.1_GCA_025209345/KAI8112286.1_GCA_025209345/KAI8103201.1_GCA_025209375/KAI8113181.1_GCA_025209375/KAL0052148.1_GCA_040206745	5	molecular_function
GO:0008569	minus-end-directed microtubule motor activity	5.53e-06	2.85e-05	1.07e-05	GCA_000143455.1_EFJ52606.1/GCA_000143455.1_EFJ52773.1/GCA_002284615.2_KAF5843852.1/KAI8113931.1_GCA_025209345/KAI8103793.1_GCA_025209375/KAK9833525.1_GCA_040144335/KAK9815239.1_GCA_040144395	7	molecular_function
GO:0005739	mitochondrion	0.000730894	0.0021067	0.000791991	GCA_000143455.1_EFJ51523.1/EFN52573.1_GCA_000147415/EFN52663.1_GCA_000147415/KDD75225.1_GCA_000690575/KAI8105422.1_GCA_025209345/KAI8106036.1_GCA_025209375	6	cellular_component
GO:0030151	molybdenum ion binding	0.00117668	0.00320318	0.00120421	KAI8104534.1_GCA_025209345/KAI8105127.1_GCA_025209375/KAK9865272.1_GCA_040144375/XP_005652039.1_GCF_000258705/XP_005652040.1_GCF_000258705	5	molecular_function
GO:0005216	monoatomic ion channel activity	0.00410129	0.0100482	0.00377751	D2010028353_1_rna-CHLNCDRAFT_52200_R0/D2105061953_1_rna-CHLNCDRAFT_52200_R0/RMZ52856.1_GCA_003709365/KAI8110821.1_GCA_025209345/KAI8107458.1_GCA_025209375/KAL0052247.1_GCA_040206745	6	molecular_function
GO:0006811	monoatomic ion transport	0.00492742	0.0117777	0.00442772	D2010028353_1_rna-CHLNCDRAFT_52200_R0/D2105061953_1_rna-CHLNCDRAFT_52200_R0/RMZ52856.1_GCA_003709365/KAI8110821.1_GCA_025209345/KAI8107458.1_GCA_025209375/KAL0052247.1_GCA_040206745	6	biological_process
GO:0006913	nucleocytoplasmic transport	0.0219491	0.0377371	0.0141869	KAI8100538.1_GCA_025209345/KAI8101076.1_GCA_025209375	2	biological_process
GO:0015299	obsolete solute:proton antiporter activity	5.19e-05	0.000188424	7.08e-05	RMZ52035.1_GCA_003709365/RMZ55254.1_GCA_003709365/KAI8101975.1_GCA_025209345/KAI8101987.1_GCA_025209345/KAI8106951.1_GCA_025209345/KAI8102503.1_GCA_025209375/KAI8102515.1_GCA_025209375/KAI8110313.1_GCA_025209375/CAK0785241.1_GCA_963575595	9	molecular_function
GO:0008171	O-methyltransferase activity	0.0188708	0.0342471	0.0128748	KAI8100973.1_GCA_025209345/KAI8101502.1_GCA_025209375/KAK9865218.1_GCA_040144375/CAL8465229.1_GCA_964261555	4	molecular_function
GO:0016409	palmitoyltransferase activity	0.00122602	0.0032473	0.00122079	D2010028365_2_rna-gnl|jgi|COCSUDRAFT_mRNA47352_R0/D2010028366_2_rna-gnl|jgi|COCSUDRAFT_mRNA47352_R0/D2203116319_2_rna-gnl|jgi|COCSUDRAFT_mRNA47352_R0/KAI8100953.1_GCA_025209345/KAI8101484.1_GCA_025209375/KAK9865296.1_GCA_040144375	6	molecular_function
GO:0016763	pentosyltransferase activity	0.00983288	0.0200755	0.00754717	KAI3430526.1_GCA_023343905/KAI8102985.1_GCA_025209345/KAI8103518.1_GCA_025209375	3	molecular_function
GO:0005777	peroxisome	0.000267396	0.000794084	0.000298528	D2010028365_2_rna-gnl|jgi|COCSUDRAFT_mRNA52469_R0/D2010028366_2_rna-gnl|jgi|COCSUDRAFT_mRNA52469_R0/D2105061953_1_rna-CHLNCDRAFT_36152_R0/D2203116319_2_rna-gnl|jgi|COCSUDRAFT_mRNA52469_R0/KAI8108423.1_GCA_025209345/KAI8109096.1_GCA_025209375	6	cellular_component
GO:0016310	phosphorylation	0.000144632	0.000472465	0.000177618	KAI8102975.1_GCA_025209345/KAI8114127.1_GCA_025209345/KAI8103508.1_GCA_025209375/KAI8103986.1_GCA_025209375/KAK9852315.1_GCA_040144375/KAL0035521.1_GCA_040206735	6	biological_process
GO:0042558	pteridine-containing compound metabolic process	5.75e-09	9.39e-08	3.53e-08	GCA_002284615.2_KAF5842524.1/RMZ52400.1_GCA_003709365/KAI8103043.1_GCA_025209345/KAI8103583.1_GCA_025209375/WPT16652.1_GCA_034226945/KAK9817552.1_GCA_040144355/KAK9865852.1_GCA_040144375	7	biological_process
GO:0045277	respiratory chain complex IV	1.4e-06	1.11e-05	4.15e-06	GCA_000143455.1_EFJ51523.1/EFN52573.1_GCA_000147415/EFN52663.1_GCA_000147415/KDD75225.1_GCA_000690575/KAI8105422.1_GCA_025209345/KAI8106036.1_GCA_025209375	6	cellular_component
GO:0003724	RNA helicase activity	5.91e-05	0.000206677	7.77e-05	GCA_000143455.1_EFJ52298.1/KAI8101735.1_GCA_025209345/KAI8102987.1_GCA_025209345/KAI8102266.1_GCA_025209375/KAI8103520.1_GCA_025209375	5	molecular_function
GO:0001510	RNA methylation	0.00956306	0.0199778	0.00751045	KAI8109913.1_GCA_025209345/KAI8111936.1_GCA_025209375/KAL0029527.1_GCA_040206755	3	biological_process
GO:0008173	RNA methyltransferase activity	4.68e-12	1.53e-10	5.74e-11	D2010028353_1_rna-CHLNCDRAFT_52745_R0/D2010028365_1_rna-CHLNCDRAFT_52745_R0/D2010028366_1_rna-CHLNCDRAFT_52745_R0/D2105061953_1_rna-CHLNCDRAFT_52745_R0/D2203116305_1_rna-CHLNCDRAFT_52745_R0/KAI8105436.1_GCA_025209345/KAI8106051.1_GCA_025209375/EFN52863.1_GCA_000147415/GCA_002284615.2_KAF5838523.1/GCA_002284615.2_KAF5838524.1/KAI8109420.1_GCA_025209345/KAI8111442.1_GCA_025209375/KAI8109913.1_GCA_0…	15	molecular_function
GO:0003964	RNA-directed DNA polymerase activity	0.00602016	0.0137204	0.00515803	KAI8113946.1_GCA_025209345/KAI8103807.1_GCA_025209375	2	molecular_function
GO:0000723	telomere maintenance	0.0243273	0.0411047	0.0154529	KAI8101656.1_GCA_025209345/KAI8102186.1_GCA_025209375/KAK9815272.1_GCA_040144395	3	biological_process
GO:0009228	thiamine biosynthetic process	0.000201909	0.000618345	0.000232461	KAI8100606.1_GCA_025209345/KAI8101144.1_GCA_025209375/KAI8109757.1_GCA_025209345/KAI8111777.1_GCA_025209375	4	biological_process
GO:0030976	thiamine pyrophosphate binding	2.11e-06	1.48e-05	5.55e-06	RMZ52179.1_GCA_003709365/BDA45528.1_GCA_020887355/KAI8104585.1_GCA_025209345/KAI8105178.1_GCA_025209375/WPT15208.1_GCA_034226945/GCA_002284615.2_KAF5840529.1/KAI8107183.1_GCA_025209345/KAI8110541.1_GCA_025209375/KAL0021524.1_GCA_040206735	9	molecular_function
GO:0006413	translational initiation	0.00133622	0.00344603	0.0012955	D2010028365_2_rna-gnl|jgi|COCSUDRAFT_mRNA83552_R0/D2010028366_2_rna-gnl|jgi|COCSUDRAFT_mRNA83552_R0/D2203116319_2_rna-gnl|jgi|COCSUDRAFT_mRNA83552_R0/EFN52961.1_GCA_000147415/KAI8101711.1_GCA_025209345/KAI8102242.1_GCA_025209375/CAK0782652.1_GCA_963575595	7	biological_process
GO:0043039	tRNA aminoacylation	0.00204805	0.00514639	0.00193473	KAA6428526.1_GCA_008636185/KAI8100990.1_GCA_025209345/KAI8101519.1_GCA_025209375/KAK2078524.1_GCA_031763795/KAK9901524.1_GCA_040182555/CAK0787152.1_GCA_963575595	6	biological_process
GO:0002100	tRNA wobble adenosine to inosine editing	2.88e-05	0.000108545	4.08e-05	KAI8109996.1_GCA_025209345/KAI8114152.1_GCA_025209345/KAI8104012.1_GCA_025209375/KAI8112018.1_GCA_025209375/KAK9822520.1_GCA_040144355/XP_005651528.1_GCF_000258705	6	biological_process
GO:0008251	tRNA-specific adenosine deaminase activity	2.88e-05	0.000108545	4.08e-05	KAI8109996.1_GCA_025209345/KAI8114152.1_GCA_025209345/KAI8104012.1_GCA_025209375/KAI8112018.1_GCA_025209375/KAK9822520.1_GCA_040144355/XP_005651528.1_GCF_000258705	6	molecular_function
GO:0005247	voltage-gated chloride channel activity	0.0125829	0.0246625	0.00927161	KAI8104515.1_GCA_025209345/KAI8105116.1_GCA_025209375/WPT15279.1_GCA_034226945/KAK9915237.1_GCA_040182555	4	molecular_function

## Sheet: Supplementary table2
ID	Description	pvalue	p.adjust	qvalue	geneID	Count
GO:0051537	"2 iron, 2 sulfur cluster binding"	1.62e-10	2.7e-09	1.41e-09	D2010028353_2_rna-gnl|WGS_LHPF|mrna.C2E20_7532_R0/D2010028353_1_rna-CHLNCDRAFT_145588_R0/D2010028353_1_rna-CHLNCDRAFT_137589_R0/D2010028365_2_rna-gnl|jgi|COCSUDRAFT_mRNA47272_R6/D2010028365_2_rna-gnl|jgi|COCSUDRAFT_mRNA47549_R0/D2010028365_2_rna-gnl|jgi|COCSUDRAFT_mRNA46572_R0/D2010028365_2_rna-gnl|jgi|COCSUDRAFT_mRNA62940_R4/D2010028365_2_rna-gnl|jgi|COCSUDRAFT_mRNA39968_R0/D2010028365_2_rna-gnl…	30	“2铁，2硫簇结合”
GO:0004571	"mannosyl-oligosaccharide 1,2-alpha-mannosidase activity"	3.15e-09	4.2e-08	2.19e-08	D2010028353_1_rna-CHLNCDRAFT_133855_R0/D2010028353_3_rna-gnl|WGS_JADXDR|g10832.t1_R0/D2010028365_2_rna-gnl|jgi|COCSUDRAFT_mRNA37668_R0/D2010028365_2_rna-gnl|jgi|COCSUDRAFT_mRNA28682_R0/D2010028365_2_rna-gnl|jgi|COCSUDRAFT_mRNA37668_R2/D2010028365_2_rna-gnl|jgi|COCSUDRAFT_mRNA48568_R0/D2010028366_2_rna-gnl|jgi|COCSUDRAFT_mRNA48568_R0/D2010028366_2_rna-gnl|jgi|COCSUDRAFT_mRNA28682_R0/D2010028366_2_…	16	“甘露糖寡糖1,2- α -甘露糖苷酶活性”
GO:0000275	"mitochondrial proton-transporting ATP synthase complex, catalytic sector F(1)"	1.13e-06	8.07e-06	4.2e-06	D2010028353_1_rna-CHLNCDRAFT_48298_R0/D2010028365_2_rna-gnl|jgi|COCSUDRAFT_mRNA65925_R0/D2010028366_2_rna-gnl|jgi|COCSUDRAFT_mRNA65925_R0/GCA_002284615.2_KAF5843535.1/KAK9865628.1_GCA_040144375/CAL0289678.1_GCA_964019345	6	线粒体质子转运ATP合酶复合物，催化区F(1)
GO:0016702	"oxidoreductase activity, acting on single donors with incorporation of molecular oxygen, incorporation of two atoms of oxygen"	0.00413658	0.012348	0.00643395	D2010028353_2_rna-gnl|WGS_LHPF|mrna.C2E20_3185_R0/D2010028353_1_rna-CHLNCDRAFT_134121_R0/D2010028365_2_rna-gnl|jgi|COCSUDRAFT_mRNA62551_R0/D2010028365_2_rna-gnl|jgi|COCSUDRAFT_mRNA62551_R1/D2010028366_2_rna-gnl|jgi|COCSUDRAFT_mRNA62551_R0/D2010028366_2_rna-gnl|jgi|COCSUDRAFT_mRNA62551_R1/GCA_002284615.2_KAF5831298.1/GCA_002284615.2_KAF5842137.1/KAA6428615.1_GCA_008636185/KAL0028087.1_GCA_04020673…	11	氧化还原酶活性，作用于含有分子氧的单个供体，含有两个氧原子
GO:0005546	"phosphatidylinositol-4,5-bisphosphate binding"	0.00056804	0.00227216	0.00118392	D2010028353_1_rna-CHLNCDRAFT_50911_R0/D2010028365_2_rna-gnl|jgi|COCSUDRAFT_mRNA48354_R0/D2010028366_2_rna-gnl|jgi|COCSUDRAFT_mRNA48354_R0/CAL0288529.1_GCA_964019345	4	“phosphatidylinositol-4 5-bisphosphate绑定”,
GO:0016773	"phosphotransferase activity, alcohol group as acceptor"	0.00684663	0.0185044	0.00964177	D2010028353_1_rna-CHLNCDRAFT_135795_R0/D2010028365_2_rna-gnl|jgi|COCSUDRAFT_mRNA24901_R0/D2010028365_2_rna-gnl|jgi|COCSUDRAFT_mRNA35244_R0/D2010028366_2_rna-gnl|jgi|COCSUDRAFT_mRNA24901_R0/D2010028366_2_rna-gnl|jgi|COCSUDRAFT_mRNA35244_R0/GCA_002284615.2_KAF5830028.1/D2010028365_4_rna-gnl|WGS_JADXDR|g8051.t1_R0/D2010028366_4_rna-gnl|WGS_JADXDR|g8051.t1_R0	8	“磷酸转移酶活性，醇基作为受体”
GO:0003848	2-amino-4-hydroxy-6-hydroxymethyldihydropteridine diphosphokinase activity	8.99e-06	5.62e-05	2.93e-05	D2010028353_3_rna-gnl|WGS_JADXDR|g6881.t1_R0/D2010028366_2_rna-gnl|jgi|COCSUDRAFT_mRNA14477_R0/GCA_002284615.2_KAF5842524.1/KAK2076028.1_GCA_031763795/CAK0764428.1_GCA_963575595/CAL0288762.1_GCA_964019345	6	2-氨基-4-羟基-6-羟甲基二氢蝶啶二磷酸激酶活性
GO:0008124	4-alpha-hydroxytetrahydrobiopterin dehydratase activity	0.000343083	0.00142951	0.000744852	D2010028353_1_rna-CHLNCDRAFT_137157_R0/D2010028365_4_rna-gnl|WGS_JADXDR|g9698.t1_R0/D2010028366_4_rna-gnl|WGS_JADXDR|g9698.t1_R0/GCA_002284615.2_KAF5831293.1/GCA_002284615.2_KAF5843234.1/KAL0028190.1_GCA_040206755	6	4- α -羟基四氢生物蝶呤脱水酶活性
GO:0004000	adenosine deaminase activity	0.00166489	0.00554964	0.00289165	D2010028353_1_rna-CHLNCDRAFT_133846_R0/D2010028365_2_rna-gnl|jgi|COCSUDRAFT_mRNA65938_R0/D2010028366_2_rna-gnl|jgi|COCSUDRAFT_mRNA65938_R0/GCA_002284615.2_KAF5837781.1	4	腺苷脱氨酶活性
GO:0004556	alpha-amylase activity	3.98e-07	3.5e-06	1.83e-06	D2010028353_1_rna-CHLNCDRAFT_35990_R0/D2010028365_2_rna-gnl|jgi|COCSUDRAFT_mRNA17342_R0/D2010028365_2_rna-gnl|jgi|COCSUDRAFT_mRNA19451_R0/D2010028365_2_rna-gnl|jgi|COCSUDRAFT_mRNA47893_R0/D2010028366_2_rna-gnl|jgi|COCSUDRAFT_mRNA19451_R0/D2010028366_2_rna-gnl|jgi|COCSUDRAFT_mRNA47893_R0/D2010028366_2_rna-gnl|jgi|COCSUDRAFT_mRNA17342_R0/GCA_002284615.2_KAF5832548.1/GCA_002284615.2_KAF5833595.1/GCA…	12	α-淀粉酶活性	负责淀粉的降解，转化为更小的糖分，为能量提供原料。
GO:0009308	amine metabolic process	9.63e-13	4.81e-11	2.51e-11	D2010028365_1_rna-CHLNCDRAFT_18415_R3/D2010028365_2_rna-gnl|jgi|COCSUDRAFT_mRNA29142_R0/D2010028365_2_rna-gnl|jgi|COCSUDRAFT_mRNA28332_R0/D2010028365_2_rna-gnl|jgi|COCSUDRAFT_mRNA45839_R0/D2010028366_2_rna-gnl|jgi|COCSUDRAFT_mRNA29142_R0/D2010028366_2_rna-gnl|jgi|COCSUDRAFT_mRNA45839_R0/D2010028366_2_rna-gnl|jgi|COCSUDRAFT_mRNA28332_R0/D2203116319_2_rna-gnl|jgi|COCSUDRAFT_mRNA28332_R0/GCA_0022846…	16	胺代谢过程
GO:0072488	ammonium transmembrane transport	2.6e-12	7.43e-11	3.87e-11	D2010028353_1_rna-CHLNCDRAFT_56592_R0/D2010028353_1_rna-CHLNCDRAFT_141357_R0/D2010028353_3_rna-gnl|WGS_JADXDR|g6089.t1_R0/D2010028353_1_rna-CHLNCDRAFT_136742_R0/D2010028365_2_rna-gnl|jgi|COCSUDRAFT_mRNA47532_R0/D2010028365_2_rna-gnl|jgi|COCSUDRAFT_mRNA52218_R0/D2010028366_2_rna-gnl|jgi|COCSUDRAFT_mRNA52218_R0/D2010028366_2_rna-gnl|jgi|COCSUDRAFT_mRNA47532_R0/GCA_002284615.2_KAF5826679.1/GCA_00228…	18	铵跨膜转运
GO:0008519	ammonium transmembrane transporter activity	2.6e-12	7.43e-11	3.87e-11	D2010028353_1_rna-CHLNCDRAFT_56592_R0/D2010028353_1_rna-CHLNCDRAFT_141357_R0/D2010028353_3_rna-gnl|WGS_JADXDR|g6089.t1_R0/D2010028353_1_rna-CHLNCDRAFT_136742_R0/D2010028365_2_rna-gnl|jgi|COCSUDRAFT_mRNA47532_R0/D2010028365_2_rna-gnl|jgi|COCSUDRAFT_mRNA52218_R0/D2010028366_2_rna-gnl|jgi|COCSUDRAFT_mRNA52218_R0/D2010028366_2_rna-gnl|jgi|COCSUDRAFT_mRNA47532_R0/GCA_002284615.2_KAF5826679.1/GCA_00228…	18	铵跨膜转运活性
GO:0031145	anaphase-promoting complex-dependent catabolic process	0.00882415	0.0220604	0.0114946	GCA_002284615.2_KAF5829675.1/D2010028353_2_rna-gnl|WGS_LHPF|mrna.C2E20_1788_R0/D2010028365_2_rna-gnl|jgi|COCSUDRAFT_mRNA24026_R0/D2010028366_2_rna-gnl|jgi|COCSUDRAFT_mRNA24026_R0/GCA_000143455.1_EFJ41628.1/GCA_002284615.2_KAF5834066.1/KAK9828935.1_GCA_040144395/CAL0289124.1_GCA_964019345	8	后期促进复合体依赖性分解代谢过程
GO:0015297	antiporter activity	2.32e-14	2.32e-12	1.21e-12	D2010028353_1_rna-CHLNCDRAFT_144825_R0/D2010028353_1_rna-CHLNCDRAFT_133260_R0/D2010028353_1_rna-CHLNCDRAFT_58521_R0/D2010028353_1_rna-CHLNCDRAFT_19008_R0/D2010028353_1_rna-CHLNCDRAFT_142267_R0/D2010028365_2_rna-gnl|jgi|COCSUDRAFT_mRNA40375_R0/D2010028366_2_rna-gnl|jgi|COCSUDRAFT_mRNA40375_R0/EFN52897.1_GCA_000147415/EFN58288.1_GCA_000147415/GCA_002284615.2_KAF5825908.1/GCA_002284615.2_KAF5833225.…	30	逆向转运活动	通过将一种物质输送出去的同时，将另一种物质输送进细胞，帮助维持细胞内离子和小分子平衡。
GO:0005471	ATP:ADP antiporter activity	9.15e-05	0.000446239	0.000232514	D2010028353_2_rna-gnl|WGS_LHPF|mrna.C2E20_8953_R0/D2010028353_1_rna-CHLNCDRAFT_56336_R0/D2010028365_2_rna-gnl|jgi|COCSUDRAFT_mRNA26128_R0/D2010028366_2_rna-gnl|jgi|COCSUDRAFT_mRNA26128_R0/GCA_002284615.2_KAF5838662.1/GCA_002284615.2_KAF5842867.1/KAK9832801.1_GCA_040144335/KAK9802845.1_GCA_040144405	8	ATP:ADP反向转运活性	促进细胞内外核苷酸的转运，支持DNA和RNA的合成。
GO:0042626	ATPase-coupled transmembrane transporter activity	0.0014812	0.0051972	0.00270801	D2010028353_3_rna-gnl|WGS_JADXDR|g3275.t1_R0/D2010028365_2_rna-gnl|jgi|COCSUDRAFT_mRNA64664_R0/D2010028366_2_rna-gnl|jgi|COCSUDRAFT_mRNA64664_R0/KAI7837280.1_GCA_025026875	4	atp酶耦联跨膜转运蛋白活性
GO:0004176	ATP-dependent peptidase activity	0.000164215	0.000729845	0.000380288	D2010028353_2_rna-gnl|WGS_LHPF|mrna.C2E20_7258_R1/D2010028365_2_rna-gnl|jgi|COCSUDRAFT_mRNA22213_R0/D2010028365_2_rna-gnl|jgi|COCSUDRAFT_mRNA22106_R0/D2010028365_1_rna-CHLNCDRAFT_142278_R2/D2010028365_3_rna-gnl|WGS_LHPF|mrna.C2E20_2318_R0/D2010028366_3_rna-gnl|WGS_LHPF|mrna.C2E20_2318_R0/D2010028366_2_rna-gnl|jgi|COCSUDRAFT_mRNA22213_R0/GCA_002284615.2_KAF5827214.1/GCA_002284615.2_KAF5831580.1/GC…	16	atp依赖性肽酶活性
GO:0140662	ATP-dependent protein folding chaperone	0.000899783	0.00339541	0.00176919	WPT17280.1_GCA_034226945/D2010028353_2_rna-gnl|WGS_LHPF|mrna.C2E20_3552_R0/D2010028365_2_rna-gnl|jgi|COCSUDRAFT_mRNA27626_R0/D2010028366_2_rna-gnl|jgi|COCSUDRAFT_mRNA27626_R0/EFN52806.1_GCA_000147415/GCA_002284615.2_KAF5832968.1/KAL0028836.1_GCA_040206735/CAL0287705.1_GCA_964019345/D2010028353_3_rna-gnl|WGS_JADXDR|g8051.t1_R0/D2010028365_4_rna-gnl|WGS_JADXDR|g8051.t1_R0/D2010028365_2_rna-gnl|jgi|…	17	atp依赖性蛋白质折叠伴侣蛋白
GO:0016161	beta-amylase activity	4.22e-10	6.49e-09	3.38e-09	D2010028353_1_rna-CHLNCDRAFT_139821_R0/D2010028353_1_rna-CHLNCDRAFT_134683_R0/D2010028365_2_rna-gnl|jgi|COCSUDRAFT_mRNA27423_R0/D2010028365_2_rna-gnl|jgi|COCSUDRAFT_mRNA20858_R0/D2010028366_2_rna-gnl|jgi|COCSUDRAFT_mRNA27423_R2/D2010028366_2_rna-gnl|jgi|COCSUDRAFT_mRNA20858_R0/GCA_002284615.2_KAF5827053.1/GCA_002284615.2_KAF5833355.1/WPT17280.1_GCA_034226945/KAK9828096.1_GCA_040144335/KAK9828277.…	13	β-淀粉酶活性	参与淀粉的降解，将其转化为糖分，为能量提供来源。
GO:0010277	chlorophyllide a oxygenase [overall] activity	3.53e-12	8.83e-11	4.6e-11	D2010028353_1_rna-CHLNCDRAFT_51738_R0/D2010028353_1_rna-CHLNCDRAFT_145588_R0/D2010028365_2_rna-gnl|jgi|COCSUDRAFT_mRNA47272_R6/D2010028365_2_rna-gnl|jgi|COCSUDRAFT_mRNA47549_R0/D2010028365_2_rna-gnl|jgi|COCSUDRAFT_mRNA46572_R0/D2010028365_2_rna-gnl|jgi|COCSUDRAFT_mRNA39968_R0/D2010028366_2_rna-gnl|jgi|COCSUDRAFT_mRNA47272_R0/D2010028366_2_rna-gnl|jgi|COCSUDRAFT_mRNA46572_R0/D2010028366_2_rna-gnl|…	22	叶绿素a氧合酶[总体]活性	参与叶绿素的合成与修饰，对光合作用至关重要。
GO:0005507	copper ion binding	7.07e-05	0.000371907	0.000193783	D2010028365_1_rna-CHLNCDRAFT_18415_R3/D2010028365_2_rna-gnl|jgi|COCSUDRAFT_mRNA29142_R0/D2010028365_2_rna-gnl|jgi|COCSUDRAFT_mRNA28332_R0/D2010028365_2_rna-gnl|jgi|COCSUDRAFT_mRNA45839_R0/D2010028366_2_rna-gnl|jgi|COCSUDRAFT_mRNA29142_R0/D2010028366_2_rna-gnl|jgi|COCSUDRAFT_mRNA45839_R0/D2010028366_2_rna-gnl|jgi|COCSUDRAFT_mRNA28332_R0/D2203116319_2_rna-gnl|jgi|COCSUDRAFT_mRNA28332_R0/GCA_0022846…	16	铜离子结合
GO:0031390	Ctf18 RFC-like complex	0.00281134	0.0089249	0.00465034	D2010028353_1_rna-CHLNCDRAFT_134854_R0/D2010028366_2_rna-gnl|jgi|COCSUDRAFT_mRNA63214_R0/GCA_002284615.2_KAF5843339.1/KAK9828221.1_GCA_040144355/CAL0289909.1_GCA_964019345	5	Ctf18 rfc样复合体
GO:0097602	cullin family protein binding	0.00684663	0.0185044	0.00964177	GCA_002284615.2_KAF5829675.1/D2010028353_2_rna-gnl|WGS_LHPF|mrna.C2E20_1788_R0/D2010028365_2_rna-gnl|jgi|COCSUDRAFT_mRNA24026_R0/D2010028366_2_rna-gnl|jgi|COCSUDRAFT_mRNA24026_R0/GCA_000143455.1_EFJ41628.1/GCA_002284615.2_KAF5834066.1/KAK9828935.1_GCA_040144395/CAL0289124.1_GCA_964019345	8	Cullin家族蛋白结合
GO:0003887	DNA-directed DNA polymerase activity	6.93e-05	0.000371907	0.000193783	D2010028353_1_rna-CHLNCDRAFT_134898_R1/D2010028353_1_rna-CHLNCDRAFT_134899_R0/GCA_002284615.2_KAF5825440.1/GCA_002284615.2_KAF5826223.1/GCA_002284615.2_KAF5826251.1/GCA_002284615.2_KAF5826252.1/GCA_002284615.2_KAF5826253.1/GCA_002284615.2_KAF5826691.1/GCA_002284615.2_KAF5828436.1/KAI3428505.1_GCA_023343905/KAK9824289.1_GCA_040144395	11	DNA指导的DNA聚合酶活性
GO:0000724	double-strand break repair via homologous recombination	0.00166489	0.00554964	0.00289165	D2010028353_3_rna-gnl|WGS_JADXDR|g1859.t1_R0/D2010028365_2_rna-gnl|jgi|COCSUDRAFT_mRNA56086_R0/D2010028366_2_rna-gnl|jgi|COCSUDRAFT_mRNA56086_R0/GCA_002284615.2_KAF5831913.1	4	通过同源重组进行双链断裂修复
GO:0009396	folic acid-containing compound biosynthetic process	8.99e-06	5.62e-05	2.93e-05	D2010028353_3_rna-gnl|WGS_JADXDR|g6881.t1_R0/D2010028366_2_rna-gnl|jgi|COCSUDRAFT_mRNA14477_R0/GCA_002284615.2_KAF5842524.1/KAK2076028.1_GCA_031763795/CAK0764428.1_GCA_963575595/CAL0288762.1_GCA_964019345	6	含叶酸化合物的生物合成过程
GO:0004332	fructose-bisphosphate aldolase activity	1.4e-10	2.55e-09	1.33e-09	D2010028353_1_rna-CHLNCDRAFT_59826_R0/D2010028353_3_rna-gnl|WGS_JADXDR|g5897.t1_R0/D2010028353_1_rna-CHLNCDRAFT_37179_R0/D2010028365_2_rna-gnl|jgi|COCSUDRAFT_mRNA34109_R0/D2010028365_2_rna-gnl|jgi|COCSUDRAFT_mRNA52754_R0/D2010028366_2_rna-gnl|jgi|COCSUDRAFT_mRNA34109_R0/GCA_002284615.2_KAF5828396.1/GCA_002284615.2_KAF5836483.1/GCA_002284615.2_KAF5836495.1/GCA_002284615.2_KAF5836500.1/GCA_00228461…	16	果糖二磷酸醛缩酶活性	在糖酵解和糖异生中催化关键反应，产生能量和原料。
GO:0033566	gamma-tubulin complex localization	0.00920238	0.0224448	0.0116949	D2010028365_2_rna-gnl|jgi|COCSUDRAFT_mRNA47235_R0/D2010028366_2_rna-gnl|jgi|COCSUDRAFT_mRNA47235_R0/KAA6428013.1_GCA_008636185	3	γ -微管蛋白复合物定位
GO:0000931	gamma-tubulin ring complex	0.00920238	0.0224448	0.0116949	D2010028365_2_rna-gnl|jgi|COCSUDRAFT_mRNA47235_R0/D2010028366_2_rna-gnl|jgi|COCSUDRAFT_mRNA47235_R0/KAA6428013.1_GCA_008636185	3	γ -微管蛋白环复合物
GO:0004819	glutamine-tRNA ligase activity	7.95e-09	8.83e-08	4.6e-08	D2010028353_2_rna-gnl|WGS_LHPF|mrna.C2E20_4235_R0/D2010028365_2_rna-gnl|jgi|COCSUDRAFT_mRNA35757_R0/D2010028366_2_rna-gnl|jgi|COCSUDRAFT_mRNA35757_R0/GCA_002284615.2_KAF5833219.1/KAI3428074.1_GCA_023343905/KAK9832832.1_GCA_040144335/KAL0020283.1_GCA_040206735/CAL0288316.1_GCA_964019345	8	谷氨酰胺trna连接酶活性
GO:0006425	glutaminyl-tRNA aminoacylation	7.95e-09	8.83e-08	4.6e-08	D2010028353_2_rna-gnl|WGS_LHPF|mrna.C2E20_4235_R0/D2010028365_2_rna-gnl|jgi|COCSUDRAFT_mRNA35757_R0/D2010028366_2_rna-gnl|jgi|COCSUDRAFT_mRNA35757_R0/GCA_002284615.2_KAF5833219.1/KAI3428074.1_GCA_023343905/KAK9832832.1_GCA_040144335/KAL0020283.1_GCA_040206735/CAL0288316.1_GCA_964019345	8	glutaminyl-tRNA氨酰化
GO:0004425	indole-3-glycerol-phosphate synthase activity	0.00301511	0.00942223	0.00490948	D2010028365_2_rna-gnl|jgi|COCSUDRAFT_mRNA47639_R0/D2010028366_2_rna-gnl|jgi|COCSUDRAFT_mRNA47639_R0/GCA_002284615.2_KAF5840700.1/CAK0782855.1_GCA_963575595/CAL0289237.1_GCA_964019345	5	吲哚-3-甘油-磷酸合酶活性	在生物合成过程中起重要作用，是植物生长的重要机制。
GO:0005315	inorganic phosphate transmembrane transporter activity	6.21e-08	5.92e-07	3.08e-07	D2010028353_3_rna-gnl|WGS_JADXDR|g979.t1_R0/D2010028353_1_rna-CHLNCDRAFT_133070_R0/D2010028353_1_rna-CHLNCDRAFT_33297_R0/D2010028365_2_rna-gnl|jgi|COCSUDRAFT_mRNA13548_R0/D2010028365_2_rna-gnl|jgi|COCSUDRAFT_mRNA37111_R0/D2010028366_2_rna-gnl|jgi|COCSUDRAFT_mRNA37111_R0/D2010028366_2_rna-gnl|jgi|COCSUDRAFT_mRNA13548_R0/GCA_002284615.2_KAF5827411.1/GCA_002284615.2_KAF5835955.1/GCA_002284615.2_KAF5…	13	无机磷酸盐跨膜转运活性	促进无机磷酸盐的运输，对能量代谢和合成至关重要。
GO:0019310	inositol catabolic process	0.000109784	0.000503617	0.000262411	D2010028353_3_rna-gnl|WGS_JADXDR|g9690.t1_R0/D2010028365_3_rna-gnl|WGS_LHPF|mrna.C2E20_0669_R0/D2010028366_3_rna-gnl|WGS_LHPF|mrna.C2E20_0669_R0/GCA_002284615.2_KAF5842446.1/GCA_002284615.2_KAF5842447.1	5	肌醇分解代谢过程
GO:0050113	inositol oxygenase activity	0.000109784	0.000503617	0.000262411	D2010028353_3_rna-gnl|WGS_JADXDR|g9690.t1_R0/D2010028365_3_rna-gnl|WGS_LHPF|mrna.C2E20_0669_R0/D2010028366_3_rna-gnl|WGS_LHPF|mrna.C2E20_0669_R0/GCA_002284615.2_KAF5842446.1/GCA_002284615.2_KAF5842447.1	5	肌醇加氧酶活性
GO:0030026	intracellular manganese ion homeostasis	4.38e-07	3.5e-06	1.83e-06	D2010028353_3_rna-gnl|WGS_JADXDR|g8724.t1_R0/D2010028365_2_rna-gnl|jgi|COCSUDRAFT_mRNA60838_R0/D2010028366_2_rna-gnl|jgi|COCSUDRAFT_mRNA60838_R1/D2010028366_2_rna-gnl|jgi|COCSUDRAFT_mRNA60838_R0/EFN54428.1_GCA_000147415/GCA_002284615.2_KAF5842572.1/KAK9828808.1_GCA_040144395/KAL0040281.1_GCA_040206735/CAL0287748.1_GCA_964019345	9	细胞内锰离子稳态
GO:0034755	iron ion transmembrane transport	0.0172897	0.0392949	0.0204747	D2010028353_2_rna-gnl|WGS_LHPF|mrna.C2E20_3552_R0/D2010028365_2_rna-gnl|jgi|COCSUDRAFT_mRNA40198_R0/D2010028366_2_rna-gnl|jgi|COCSUDRAFT_mRNA40198_R0/EFN52807.1_GCA_000147415/KAL0028889.1_GCA_040206735	5	铁离子跨膜转运
GO:0005381	iron ion transmembrane transporter activity	0.0172897	0.0392949	0.0204747	D2010028353_2_rna-gnl|WGS_LHPF|mrna.C2E20_3552_R0/D2010028365_2_rna-gnl|jgi|COCSUDRAFT_mRNA40198_R0/D2010028366_2_rna-gnl|jgi|COCSUDRAFT_mRNA40198_R0/EFN52807.1_GCA_000147415/KAL0028889.1_GCA_040206735	5	铁离子跨膜转运活性
GO:0016298	lipase activity	0.00351147	0.0106408	0.00554443	D2010028353_3_rna-gnl|WGS_JADXDR|g10744.t1_R0/RMZ52879.1_GCA_003709365/CAL0288229.1_GCA_964019345	3	脂肪酶活性	催化脂肪的水解，提供能量来源。
GO:0005811	lipid droplet	0.00351147	0.0106408	0.00554443	D2010028353_3_rna-gnl|WGS_JADXDR|g10744.t1_R0/RMZ52879.1_GCA_003709365/CAL0288229.1_GCA_964019345	3	脂滴
GO:0016851	magnesium chelatase activity	0.0142703	0.0343863	0.0179171	D2010028353_2_rna-gnl|WGS_LHPF|mrna.C2E20_5543_R0/GCA_002284615.2_KAF5843563.1/KAA6428217.1_GCA_008636185/CAL0287767.1_GCA_964019345	4	镁螯合酶活性
GO:0004471	malate dehydrogenase (decarboxylating) (NAD+) activity	5.16e-05	0.000294888	0.000153652	D2010028353_1_rna-CHLNCDRAFT_35453_R0/D2010028365_1_rna-CHLNCDRAFT_35453_R0/D2010028365_2_rna-gnl|jgi|COCSUDRAFT_mRNA54433_R0/D2010028366_1_rna-CHLNCDRAFT_35453_R0/D2010028366_2_rna-gnl|jgi|COCSUDRAFT_mRNA54433_R0/GCA_002284615.2_KAF5838419.1/KAA6428565.1_GCA_008636185/KAK9828988.1_GCA_040144395/KAL0028651.1_GCA_040206755/CAL8470928.1_GCA_964261555	10	苹果酸脱氢酶（脱羧）（NAD+）活性	参与碳代谢，有助于细胞能量的产生。
GO:0050080	malonyl-CoA decarboxylase activity	0.000407583	0.00166361	0.000866826	D2010028353_3_rna-gnl|WGS_JADXDR|g10260.t1_R0/GCA_002284615.2_KAF5827300.1/KAI8102893.1_GCA_025209345/KAI8103428.1_GCA_025209375	4	丙二酰coa脱羧酶活性
GO:0005384	manganese ion transmembrane transporter activity	4.38e-07	3.5e-06	1.83e-06	D2010028353_3_rna-gnl|WGS_JADXDR|g8724.t1_R0/D2010028365_2_rna-gnl|jgi|COCSUDRAFT_mRNA60838_R0/D2010028366_2_rna-gnl|jgi|COCSUDRAFT_mRNA60838_R1/D2010028366_2_rna-gnl|jgi|COCSUDRAFT_mRNA60838_R0/EFN54428.1_GCA_000147415/GCA_002284615.2_KAF5842572.1/KAK9828808.1_GCA_040144395/KAL0040281.1_GCA_040206735/CAL0287748.1_GCA_964019345	9	锰离子跨膜转运活性
GO:0035596	methylthiotransferase activity	0.00558467	0.0161875	0.00843451	D2010028353_3_rna-gnl|WGS_JADXDR|g3310.t1_R0/D2010028365_2_rna-gnl|jgi|COCSUDRAFT_mRNA23373_R0/D2010028366_2_rna-gnl|jgi|COCSUDRAFT_mRNA23373_R0/GCA_002284615.2_KAF5841184.1/KAA6428035.1_GCA_008636185/KAL0054228.1_GCA_040206745	6	甲基硫转移酶活性	在某些生物合成路径中转移甲基，影响多种生化反应。
GO:0030983	mismatched DNA binding	0.015343	0.0365311	0.0190346	D2010028365_4_rna-gnl|WGS_JADXDR|g997.t1_R0/D2010028366_4_rna-gnl|WGS_JADXDR|g997.t1_R0/GCA_002284615.2_KAF5837995.1/D2010028365_1_rna-CHLNCDRAFT_139631_R0/D2010028366_1_rna-CHLNCDRAFT_139631_R0/GCA_002284615.2_KAF5838281.1/GCA_002284615.2_KAF5838282.1/KAL0028206.1_GCA_040206755/KAL0028207.1_GCA_040206755/D2010028365_2_rna-gnl|jgi|COCSUDRAFT_mRNA19308_R0/D2010028366_2_rna-gnl|jgi|COCSUDRAFT_mRNA1…	12	错配DNA结合
GO:0007064	mitotic sister chromatid cohesion	3.64e-06	2.42e-05	1.26e-05	D2010028365_2_rna-gnl|jgi|COCSUDRAFT_mRNA45500_R0/D2010028366_2_rna-gnl|jgi|COCSUDRAFT_mRNA45500_R0/KAK9828311.1_GCA_040144355/KAK9828312.1_GCA_040144355/D2010028353_1_rna-CHLNCDRAFT_134854_R0/D2010028366_2_rna-gnl|jgi|COCSUDRAFT_mRNA63214_R0/GCA_002284615.2_KAF5843339.1/KAK9828221.1_GCA_040144355/CAL0289909.1_GCA_964019345	9	有丝分裂姐妹染色单体凝聚	确保在细胞分裂过程中，姐妹染色单体的正确分离。
GO:0005216	monoatomic ion channel activity	4.05e-07	3.5e-06	1.83e-06	D2010028353_1_rna-CHLNCDRAFT_52200_R0/D2010028365_2_rna-gnl|jgi|COCSUDRAFT_mRNA67353_R0/D2010028365_2_rna-gnl|jgi|COCSUDRAFT_mRNA67353_R1/D2010028365_2_rna-gnl|jgi|COCSUDRAFT_mRNA48935_R0/D2010028365_2_rna-gnl|jgi|COCSUDRAFT_mRNA58675_R0/D2010028366_2_rna-gnl|jgi|COCSUDRAFT_mRNA48935_R0/D2010028366_2_rna-gnl|jgi|COCSUDRAFT_mRNA67353_R1/D2010028366_2_rna-gnl|jgi|COCSUDRAFT_mRNA67353_R0/D2010028366…	20	单原子离子通道活性
GO:0006811	monoatomic ion transport	7.36e-07	5.47e-06	2.85e-06	D2010028353_1_rna-CHLNCDRAFT_52200_R0/D2010028365_2_rna-gnl|jgi|COCSUDRAFT_mRNA67353_R0/D2010028365_2_rna-gnl|jgi|COCSUDRAFT_mRNA67353_R1/D2010028365_2_rna-gnl|jgi|COCSUDRAFT_mRNA48935_R0/D2010028365_2_rna-gnl|jgi|COCSUDRAFT_mRNA58675_R0/D2010028366_2_rna-gnl|jgi|COCSUDRAFT_mRNA48935_R0/D2010028366_2_rna-gnl|jgi|COCSUDRAFT_mRNA67353_R1/D2010028366_2_rna-gnl|jgi|COCSUDRAFT_mRNA67353_R0/D2010028366…	20	单原子离子转运
GO:0045892	negative regulation of DNA-templated transcription	0.00261771	0.00844423	0.00439989	D2010028353_2_rna-gnl|WGS_LHPF|mrna.C2E20_7873_R0/D2010028365_2_rna-gnl|jgi|COCSUDRAFT_mRNA47235_R0/D2010028366_2_rna-gnl|jgi|COCSUDRAFT_mRNA47235_R0/GCA_002284615.2_KAF5836763.1/KAA6428013.1_GCA_008636185	5	dna模板转录的负调控
GO:0032515	negative regulation of phosphoprotein phosphatase activity	0.00831134	0.0210414	0.0109637	D2010028353_3_rna-gnl|WGS_JADXDR|g4174.t1_R0/D2010028365_2_rna-gnl|jgi|COCSUDRAFT_mRNA52266_R0/D2010028366_2_rna-gnl|jgi|COCSUDRAFT_mRNA52266_R0	3	磷蛋白磷酸酶活性的负性调节
GO:0006862	nucleotide transport	9.15e-05	0.000446239	0.000232514	D2010028353_2_rna-gnl|WGS_LHPF|mrna.C2E20_8953_R0/D2010028353_1_rna-CHLNCDRAFT_56336_R0/D2010028365_2_rna-gnl|jgi|COCSUDRAFT_mRNA26128_R0/D2010028366_2_rna-gnl|jgi|COCSUDRAFT_mRNA26128_R0/GCA_002284615.2_KAF5838662.1/GCA_002284615.2_KAF5842867.1/KAK9832801.1_GCA_040144335/KAK9802845.1_GCA_040144405	8	核苷酸运输
GO:0097573	obsolete glutathione oxidoreductase activity	0.00784827	0.0203851	0.0106217	D2010028353_1_rna-CHLNCDRAFT_143229_R0/D2010028353_3_rna-gnl|WGS_JADXDR|g1600.t1_R0/D2010028353_3_rna-gnl|WGS_JADXDR|g9848.t1_R0/D2010028365_1_rna-CHLNCDRAFT_143229_R0/D2010028365_2_rna-gnl|jgi|COCSUDRAFT_mRNA61616_R1/D2010028366_2_rna-gnl|jgi|COCSUDRAFT_mRNA61616_R1/D2010028366_1_rna-CHLNCDRAFT_143229_R0/D2203116319_2_rna-gnl|jgi|COCSUDRAFT_mRNA32899_R0/GCA_002284615.2_KAF5832036.1/GCA_002284615…	12	过时谷胱甘肽氧化还原酶活性
GO:0010242	oxygen evolving activity	7.72e-05	0.000395986	0.00020633	D2010028353_3_rna-gnl|WGS_JADXDR|g8215.t1_R0/D2010028365_2_rna-gnl|jgi|COCSUDRAFT_mRNA30990_R0/D2010028366_2_rna-gnl|jgi|COCSUDRAFT_mRNA30990_R0/GCA_002284615.2_KAF5834379.1/GCA_002284615.2_KAF5838868.1/KAL0024287.1_GCA_040206755	6	氧气释放活性	在光合作用中释放的氧气，是光能转换的重要步骤。
GO:0033743	peptide-methionine (R)-S-oxide reductase activity	5.62e-05	0.000312366	0.000162759	D2010028353_3_rna-gnl|WGS_JADXDR|g3380.t1_R0/D2010028353_3_rna-gnl|WGS_JADXDR|g3709.t1_R0/D2010028365_2_rna-gnl|jgi|COCSUDRAFT_mRNA21422_R0/D2010028366_2_rna-gnl|jgi|COCSUDRAFT_mRNA21422_R0/GCA_002284615.2_KAF5837739.1/GCA_002284615.2_KAF5840421.1/KAI3429528.1_GCA_023343905/KAL0028775.1_GCA_040206755	8	肽-甲硫氨酸(R)- s -氧化物还原酶活性	维护蛋白质的功能，参与修复氧化损伤。
GO:0008241	peptidyl-dipeptidase activity	0.0221865	0.0487615	0.0254073	D2010028353_3_rna-gnl|WGS_JADXDR|g6467.t1_R0/GCA_002284615.2_KAF5828250.1	2	肽酰-二肽酶活性	这种酶催化肽链分子的水解，使其降解为二肽或氨基酸。藻类使用二肽和氨基酸作为营养物质，在蛋白质合成和细胞生长中发挥重要作用。此外，这种活性也可能帮助在细胞内回收氨基酸，支持细胞的代谢需求。
GO:0004601	peroxidase activity	1.11e-05	6.52e-05	3.4e-05	D2010028365_2_rna-gnl|jgi|COCSUDRAFT_mRNA26227_R0/D2010028365_2_rna-gnl|jgi|COCSUDRAFT_mRNA20424_R0/D2010028365_2_rna-gnl|jgi|COCSUDRAFT_mRNA19106_R0/D2010028366_2_rna-gnl|jgi|COCSUDRAFT_mRNA19106_R0/D2010028366_2_rna-gnl|jgi|COCSUDRAFT_mRNA26227_R0/D2010028366_2_rna-gnl|jgi|COCSUDRAFT_mRNA20424_R0/GCA_002284615.2_KAF5829755.1/GCA_002284615.2_KAF5837815.1/KAK9902886.1_GCA_040182555/KAK9902887.1_G…	13	过氧化物酶活性	通过氧化还原反应帮助细胞处理过氧化物，防止氧化伤害。
GO:0006817	phosphate ion transport	6.21e-08	5.92e-07	3.08e-07	D2010028353_3_rna-gnl|WGS_JADXDR|g979.t1_R0/D2010028353_1_rna-CHLNCDRAFT_133070_R0/D2010028353_1_rna-CHLNCDRAFT_33297_R0/D2010028365_2_rna-gnl|jgi|COCSUDRAFT_mRNA13548_R0/D2010028365_2_rna-gnl|jgi|COCSUDRAFT_mRNA37111_R0/D2010028366_2_rna-gnl|jgi|COCSUDRAFT_mRNA37111_R0/D2010028366_2_rna-gnl|jgi|COCSUDRAFT_mRNA13548_R0/GCA_002284615.2_KAF5827411.1/GCA_002284615.2_KAF5835955.1/GCA_002284615.2_KAF5…	13	磷酸离子转运
GO:0004618	phosphoglycerate kinase activity	8.85e-12	1.97e-10	1.03e-10	D2010028353_3_rna-gnl|WGS_JADXDR|g1961.t1_R0/D2010028353_1_rna-CHLNCDRAFT_48457_R0/D2010028365_1_rna-CHLNCDRAFT_29609_R2/D2010028365_2_rna-gnl|jgi|COCSUDRAFT_mRNA53354_R0/D2010028365_2_rna-gnl|jgi|COCSUDRAFT_mRNA17028_R0/D2010028365_2_rna-gnl|jgi|COCSUDRAFT_mRNA39868_R0/D2010028366_2_rna-gnl|jgi|COCSUDRAFT_mRNA17028_R0/D2010028366_2_rna-gnl|jgi|COCSUDRAFT_mRNA53354_R0/D2010028366_2_rna-gnl|jgi|CO…	14	磷酸甘油酸激酶活性
GO:0004620	phospholipase activity	0.00658805	0.0183002	0.00953534	D2010028353_1_rna-CHLNCDRAFT_140007_R0/D2010028365_2_rna-gnl|jgi|COCSUDRAFT_mRNA31115_R0/GCA_002284615.2_KAF5842106.1/CAL0289117.1_GCA_964019345	4	磷脂酶的活动	参与膜脂的水解，影响细胞信号传导。
GO:0016310	phosphorylation	0.00619881	0.0174614	0.00909833	D2010028353_2_rna-gnl|WGS_LHPF|mrna.C2E20_0072_R0/GCA_002284615.2_KAF5828538.1/GCA_002284615.2_KAF5831865.1/GCA_002284615.2_KAF5843595.1/KAA6428767.1_GCA_008636185/KAK9909282.1_GCA_040182555/GCA_002284615.2_KAF5836804.1/CAL8462813.1_GCA_964261555	8	磷酸化
GO:0042549	photosystem II stabilization	0.000110796	0.000503617	0.000262411	D2010028353_3_rna-gnl|WGS_JADXDR|g8215.t1_R0/D2010028365_2_rna-gnl|jgi|COCSUDRAFT_mRNA30990_R0/D2010028366_2_rna-gnl|jgi|COCSUDRAFT_mRNA30990_R0/GCA_002284615.2_KAF5834379.1/GCA_002284615.2_KAF5838868.1/KAL0024287.1_GCA_040206755	6	光系统II稳定性
GO:0000272	polysaccharide catabolic process	9.11e-10	1.3e-08	6.78e-09	D2010028353_1_rna-CHLNCDRAFT_139821_R0/D2010028353_1_rna-CHLNCDRAFT_134683_R0/D2010028365_2_rna-gnl|jgi|COCSUDRAFT_mRNA27423_R0/D2010028365_2_rna-gnl|jgi|COCSUDRAFT_mRNA20858_R0/D2010028366_2_rna-gnl|jgi|COCSUDRAFT_mRNA27423_R2/D2010028366_2_rna-gnl|jgi|COCSUDRAFT_mRNA20858_R0/GCA_002284615.2_KAF5827053.1/GCA_002284615.2_KAF5833355.1/WPT17280.1_GCA_034226945/KAK9828096.1_GCA_040144335/KAK9828277.…	13	多糖分解代谢过程
GO:0071805	potassium ion transmembrane transport	7.39e-07	5.47e-06	2.85e-06	D2010028353_1_rna-CHLNCDRAFT_55134_R0/D2010028365_2_rna-gnl|jgi|COCSUDRAFT_mRNA29836_R1/D2010028365_2_rna-gnl|jgi|COCSUDRAFT_mRNA29836_R3/D2010028366_2_rna-gnl|jgi|COCSUDRAFT_mRNA29836_R1/D2010028366_2_rna-gnl|jgi|COCSUDRAFT_mRNA29836_R3/BDA42863.1_GCA_020887355/KAK9861228.1_GCA_040144375/KAK9828620.1_GCA_040144395/KAK9828827.1_GCA_040144395/KAL0049287.1_GCA_040206745/KAL0028827.1_GCA_040206755/C…	12	钾离子跨膜转运
GO:0015079	potassium ion transmembrane transporter activity	2.24e-08	2.35e-07	1.23e-07	D2010028353_1_rna-CHLNCDRAFT_55134_R0/D2010028365_2_rna-gnl|jgi|COCSUDRAFT_mRNA29836_R1/D2010028365_2_rna-gnl|jgi|COCSUDRAFT_mRNA29836_R3/D2010028366_2_rna-gnl|jgi|COCSUDRAFT_mRNA29836_R1/D2010028366_2_rna-gnl|jgi|COCSUDRAFT_mRNA29836_R3/BDA42863.1_GCA_020887355/KAK9861228.1_GCA_040144375/KAK9828620.1_GCA_040144395/KAK9828827.1_GCA_040144395/KAL0049287.1_GCA_040206745/KAL0028827.1_GCA_040206755/C…	12	钾离子跨膜转运活性
GO:0008131	primary amine oxidase activity	9.63e-13	4.81e-11	2.51e-11	D2010028365_1_rna-CHLNCDRAFT_18415_R3/D2010028365_2_rna-gnl|jgi|COCSUDRAFT_mRNA29142_R0/D2010028365_2_rna-gnl|jgi|COCSUDRAFT_mRNA28332_R0/D2010028365_2_rna-gnl|jgi|COCSUDRAFT_mRNA45839_R0/D2010028366_2_rna-gnl|jgi|COCSUDRAFT_mRNA29142_R0/D2010028366_2_rna-gnl|jgi|COCSUDRAFT_mRNA45839_R0/D2010028366_2_rna-gnl|jgi|COCSUDRAFT_mRNA28332_R0/D2203116319_2_rna-gnl|jgi|COCSUDRAFT_mRNA28332_R0/GCA_0022846…	16	初级胺氧化酶活性	参与氨基酸代谢，尤其是在氨基酸的氧化过程中。
GO:0004865	protein serine/threonine phosphatase inhibitor activity	0.00831134	0.0210414	0.0109637	D2010028353_3_rna-gnl|WGS_JADXDR|g4174.t1_R0/D2010028365_2_rna-gnl|jgi|COCSUDRAFT_mRNA52266_R0/D2010028366_2_rna-gnl|jgi|COCSUDRAFT_mRNA52266_R0	3	蛋白质丝氨酸/苏氨酸磷酸酶抑制剂活性
GO:0042558	pteridine-containing compound metabolic process	0.000212196	0.000922592	0.000480719	D2010028353_3_rna-gnl|WGS_JADXDR|g6881.t1_R0/D2010028366_2_rna-gnl|jgi|COCSUDRAFT_mRNA14477_R0/GCA_002284615.2_KAF5842524.1/KAK2076028.1_GCA_031763795/CAK0764428.1_GCA_963575595/CAL0288762.1_GCA_964019345	6	含蝶啶化合物代谢过程
GO:0048038	quinone binding	2.28e-12	7.43e-11	3.87e-11	D2010028365_1_rna-CHLNCDRAFT_18415_R3/D2010028365_2_rna-gnl|jgi|COCSUDRAFT_mRNA29142_R0/D2010028365_2_rna-gnl|jgi|COCSUDRAFT_mRNA28332_R0/D2010028365_2_rna-gnl|jgi|COCSUDRAFT_mRNA45839_R0/D2010028366_2_rna-gnl|jgi|COCSUDRAFT_mRNA29142_R0/D2010028366_2_rna-gnl|jgi|COCSUDRAFT_mRNA45839_R0/D2010028366_2_rna-gnl|jgi|COCSUDRAFT_mRNA28332_R0/D2203116319_2_rna-gnl|jgi|COCSUDRAFT_mRNA28332_R0/GCA_0022846…	16	奎宁结合	重要的红氧化还原反应参与成分，影响细胞内的能量代谢和电子转移。
GO:0044528	regulation of mitochondrial mRNA stability	0.00255826	0.00838774	0.00437045	D2010028365_4_rna-gnl|WGS_JADXDR|g7955.t1_R0/D2010028366_4_rna-gnl|WGS_JADXDR|g7955.t1_R0/KAA6428199.1_GCA_008636185/CAL8462328.1_GCA_964261555	4	线粒体mRNA稳定性的调节
GO:0006979	response to oxidative stress	0.00155391	0.00535832	0.00279196	D2010028365_2_rna-gnl|jgi|COCSUDRAFT_mRNA26227_R0/D2010028365_2_rna-gnl|jgi|COCSUDRAFT_mRNA20424_R0/D2010028365_2_rna-gnl|jgi|COCSUDRAFT_mRNA19106_R0/D2010028366_2_rna-gnl|jgi|COCSUDRAFT_mRNA19106_R0/D2010028366_2_rna-gnl|jgi|COCSUDRAFT_mRNA26227_R0/D2010028366_2_rna-gnl|jgi|COCSUDRAFT_mRNA20424_R0/GCA_002284615.2_KAF5829755.1/GCA_002284615.2_KAF5837815.1/KAK9902886.1_GCA_040182555/KAK9902887.1_G…	13	氧化应激反应
GO:0042254	ribosome biogenesis	0.00420336	0.0123628	0.00644169	D2010028365_2_rna-gnl|jgi|COCSUDRAFT_mRNA64906_R0/D2010028366_2_rna-gnl|jgi|COCSUDRAFT_mRNA64906_R0/GCA_002284615.2_KAF5826509.1/GCA_002284615.2_KAF5826510.1/KAL0028964.1_GCA_040206735/CAL0287618.1_GCA_964019345/D2010028353_1_rna-CHLNCDRAFT_21830_R0/D2010028365_2_rna-gnl|jgi|COCSUDRAFT_mRNA83523_R0/D2010028366_2_rna-gnl|jgi|COCSUDRAFT_mRNA83523_R0/GCA_002284615.2_KAF5831566.1	10	核糖体生物起源
GO:0008380	RNA splicing	0.0165958	0.0385948	0.0201099	D2010028353_1_rna-CHLNCDRAFT_137712_R0/D2010028365_2_rna-gnl|jgi|COCSUDRAFT_mRNA59353_R0/D2010028366_2_rna-gnl|jgi|COCSUDRAFT_mRNA59353_R0/PSC75628.1_GCA_002245815/GCA_002284615.2_KAF5841204.1	5	RNA拼接
GO:0003964	RNA-directed DNA polymerase activity	0.00747328	0.0196665	0.0102473	D2010028353_2_rna-gnl|WGS_LHPF|mrna.C2E20_3320_R0/D2010028366_3_rna-gnl|WGS_LHPF|mrna.C2E20_3320_R0/KAL0044328.1_GCA_040206745	3	rna指导的DNA聚合酶活性
GO:0008757	S-adenosylmethionine-dependent methyltransferase activity	0.0013744	0.00490858	0.00255763	D2010028353_2_rna-gnl|WGS_LHPF|mrna.C2E20_3869_R0/D2010028365_3_rna-gnl|WGS_LHPF|mrna.C2E20_3869_R1/D2010028365_2_rna-gnl|jgi|COCSUDRAFT_mRNA53147_R0/D2010028366_2_rna-gnl|jgi|COCSUDRAFT_mRNA53147_R0/D2010028366_3_rna-gnl|WGS_LHPF|mrna.C2E20_3869_R1/GCA_002284615.2_KAF5831136.1/GCA_002284615.2_KAF5831893.1/KAI8112871.1_GCA_025209345	8	s -腺苷甲硫氨酸依赖性甲基转移酶活性
GO:0030515	snoRNA binding	0.00611317	0.0174614	0.00909833	D2010028353_1_rna-CHLNCDRAFT_21830_R0/D2010028365_2_rna-gnl|jgi|COCSUDRAFT_mRNA83523_R0/D2010028366_2_rna-gnl|jgi|COCSUDRAFT_mRNA83523_R0/GCA_002284615.2_KAF5831566.1	4	snoRNA绑定
GO:0009847	spore germination	1.61e-06	1.11e-05	5.79e-06	D2010028365_2_rna-gnl|jgi|COCSUDRAFT_mRNA65909_R0/D2010028365_2_rna-gnl|jgi|COCSUDRAFT_mRNA36075_R0/D2010028366_2_rna-gnl|jgi|COCSUDRAFT_mRNA65909_R0/D2010028366_2_rna-gnl|jgi|COCSUDRAFT_mRNA36075_R0/CAK0786283.1_GCA_963575595	5	孢子萌发
GO:2001070	starch binding	3.43e-09	4.29e-08	2.24e-08	D2010028353_3_rna-gnl|WGS_JADXDR|g7974.t1_R0/D2010028353_1_rna-CHLNCDRAFT_144885_R0/D2010028353_1_rna-CHLNCDRAFT_139625_R0/D2010028353_1_rna-CHLNCDRAFT_135558_R0/D2010028353_2_rna-gnl|WGS_LHPF|mrna.C2E20_0684_R0/D2010028353_1_rna-CHLNCDRAFT_140847_R0/D2010028353_1_rna-CHLNCDRAFT_54232_R0/D2010028365_2_rna-gnl|jgi|COCSUDRAFT_mRNA67495_R0/D2010028366_2_rna-gnl|jgi|COCSUDRAFT_mRNA67495_R0/GCA_000143…	25	淀粉绑定
GO:0015116	sulfate transmembrane transporter activity	0.0200548	0.0445662	0.0232213	D2010028353_2_rna-gnl|WGS_LHPF|mrna.C2E20_1005_R0/D2010028353_1_rna-CHLNCDRAFT_138155_R0/D2010028365_2_rna-gnl|jgi|COCSUDRAFT_mRNA43213_R0/D2010028366_2_rna-gnl|jgi|COCSUDRAFT_mRNA43213_R0/RMZ56128.1_GCA_003709365/KAK9908028.1_GCA_040182555	6	硫酸盐跨膜转运活性
GO:0008272	sulfate transport	0.0200548	0.0445662	0.0232213	D2010028353_2_rna-gnl|WGS_LHPF|mrna.C2E20_1005_R0/D2010028353_1_rna-CHLNCDRAFT_138155_R0/D2010028365_2_rna-gnl|jgi|COCSUDRAFT_mRNA43213_R0/D2010028366_2_rna-gnl|jgi|COCSUDRAFT_mRNA43213_R0/RMZ56128.1_GCA_003709365/KAK9908028.1_GCA_040182555	6	硫酸运输	帮助细胞从环境中获得硫酸盐，从而维持其生长和生理功能。
GO:0006729	tetrahydrobiopterin biosynthetic process	0.000343083	0.00142951	0.000744852	D2010028353_1_rna-CHLNCDRAFT_137157_R0/D2010028365_4_rna-gnl|WGS_JADXDR|g9698.t1_R0/D2010028366_4_rna-gnl|WGS_JADXDR|g9698.t1_R0/GCA_002284615.2_KAF5831293.1/GCA_002284615.2_KAF5843234.1/KAL0028190.1_GCA_040206755	6	四氢生物蝶呤生物合成过程
GO:0003747	translation release factor activity	0.000717216	0.00281261	0.00146552	D2010028365_4_rna-gnl|WGS_JADXDR|g10024.t1_R0/D2010028365_2_rna-gnl|jgi|COCSUDRAFT_mRNA15083_R0/D2010028365_2_rna-gnl|jgi|COCSUDRAFT_mRNA15083_R1/D2010028366_2_rna-gnl|jgi|COCSUDRAFT_mRNA15083_R0/D2010028366_4_rna-gnl|WGS_JADXDR|g10024.t1_R0/GCA_002284615.2_KAF5827554.1/GCA_002284615.2_KAF5830927.1/KAK9818328.1_GCA_040144395	8	翻译释放因子活性
GO:0006415	translational termination	0.000756355	0.00290906	0.00151577	D2010028365_4_rna-gnl|WGS_JADXDR|g10024.t1_R0/D2010028365_2_rna-gnl|jgi|COCSUDRAFT_mRNA15083_R0/D2010028365_2_rna-gnl|jgi|COCSUDRAFT_mRNA15083_R1/D2010028366_2_rna-gnl|jgi|COCSUDRAFT_mRNA15083_R0/D2010028366_4_rna-gnl|WGS_JADXDR|g10024.t1_R0/GCA_002284615.2_KAF5827554.1/GCA_002284615.2_KAF5830927.1/KAK9818328.1_GCA_040144395	8	平移终止
GO:0043039	tRNA aminoacylation	0.0160396	0.0377403	0.0196647	D2010028353_2_rna-gnl|WGS_LHPF|mrna.C2E20_4235_R0/D2010028365_2_rna-gnl|jgi|COCSUDRAFT_mRNA35757_R0/D2010028366_2_rna-gnl|jgi|COCSUDRAFT_mRNA35757_R0/GCA_002284615.2_KAF5833219.1/KAI3428074.1_GCA_023343905/KAK9832832.1_GCA_040144335/KAL0020283.1_GCA_040206735/CAL0287940.1_GCA_964019345/CAL0287941.1_GCA_964019345/CAL0288316.1_GCA_964019345	10	tRNA氨酰化
GO:0002100	tRNA wobble adenosine to inosine editing	0.00102875	0.00374093	0.00194922	D2010028353_2_rna-gnl|WGS_LHPF|mrna.C2E20_0481_R0/D2010028353_1_rna-CHLNCDRAFT_144679_R0/D2010028365_2_rna-gnl|jgi|COCSUDRAFT_mRNA19815_R0/D2010028365_2_rna-gnl|jgi|COCSUDRAFT_mRNA64748_R0/D2010028366_2_rna-gnl|jgi|COCSUDRAFT_mRNA64748_R0/D2010028366_2_rna-gnl|jgi|COCSUDRAFT_mRNA19815_R0/GCA_002284615.2_KAF5842292.1/XP_005651528.1_GCF_000258705	8	tRNA摆动腺苷到肌苷编辑
GO:0008251	tRNA-specific adenosine deaminase activity	0.00102875	0.00374093	0.00194922	D2010028353_2_rna-gnl|WGS_LHPF|mrna.C2E20_0481_R0/D2010028353_1_rna-CHLNCDRAFT_144679_R0/D2010028365_2_rna-gnl|jgi|COCSUDRAFT_mRNA19815_R0/D2010028365_2_rna-gnl|jgi|COCSUDRAFT_mRNA64748_R0/D2010028366_2_rna-gnl|jgi|COCSUDRAFT_mRNA64748_R0/D2010028366_2_rna-gnl|jgi|COCSUDRAFT_mRNA19815_R0/GCA_002284615.2_KAF5842292.1/XP_005651528.1_GCF_000258705	8	trna特异性腺苷脱氨酶活性
GO:0034477	U6 snRNA 3'-end processing	1.08e-05	6.52e-05	3.4e-05	D2010028353_1_rna-CHLNCDRAFT_136195_R0/D2010028365_2_rna-gnl|jgi|COCSUDRAFT_mRNA45724_R0/D2010028366_2_rna-gnl|jgi|COCSUDRAFT_mRNA45724_R0/GCA_002284615.2_KAF5832751.1/KAL0028916.1_GCA_040206735/CAL0287486.1_GCA_964019345	6	U6 snRNA 3'端处理
GO:0061630	ubiquitin protein ligase activity	0.00730607	0.0194829	0.0101516	GCA_002284615.2_KAF5829675.1/D2010028353_2_rna-gnl|WGS_LHPF|mrna.C2E20_1788_R0/D2010028365_2_rna-gnl|jgi|COCSUDRAFT_mRNA24026_R0/D2010028366_2_rna-gnl|jgi|COCSUDRAFT_mRNA24026_R0/GCA_000143455.1_EFJ41628.1/GCA_002284615.2_KAF5834066.1/KAK9828935.1_GCA_040144395/CAL0289124.1_GCA_964019345	8	泛素蛋白连接酶活性
GO:0008194	UDP-glycosyltransferase activity	4.49e-11	8.99e-10	4.68e-10	D2010028365_2_rna-gnl|jgi|COCSUDRAFT_mRNA46961_R0/D2010028365_2_rna-gnl|jgi|COCSUDRAFT_mRNA65542_R1/D2010028365_2_rna-gnl|jgi|COCSUDRAFT_mRNA65542_R0/D2010028365_2_rna-gnl|jgi|COCSUDRAFT_mRNA65542_R2/D2010028365_2_rna-gnl|jgi|COCSUDRAFT_mRNA46052_R0/D2010028365_2_rna-gnl|jgi|COCSUDRAFT_mRNA67635_R0/D2010028365_2_rna-gnl|jgi|COCSUDRAFT_mRNA62318_R1/D2010028365_2_rna-gnl|jgi|COCSUDRAFT_mRNA62318_R0…	20	UDP-糖基转移酶活性	催化糖基转移，对代谢和细胞壁合成等重要生物过程起作用。
GO:0042910	xenobiotic transmembrane transporter activity	2.32e-14	2.32e-12	1.21e-12	D2010028353_1_rna-CHLNCDRAFT_144825_R0/D2010028353_1_rna-CHLNCDRAFT_133260_R0/D2010028353_1_rna-CHLNCDRAFT_58521_R0/D2010028353_1_rna-CHLNCDRAFT_19008_R0/D2010028353_1_rna-CHLNCDRAFT_142267_R0/D2010028365_2_rna-gnl|jgi|COCSUDRAFT_mRNA40375_R0/D2010028366_2_rna-gnl|jgi|COCSUDRAFT_mRNA40375_R0/EFN52897.1_GCA_000147415/EFN58288.1_GCA_000147415/GCA_002284615.2_KAF5825908.1/GCA_002284615.2_KAF5833225.…	30	异生物跨膜转运蛋白活性	参与转运外来的化合物或毒素，有助于藻类对环境中有害物质的排除和解毒。

## Sheet: Supplementary table3
ID	Description	pvalue	p.adjust	qvalue	geneID	Count		转运活动
GO:0006811	monoatomic ion transport	8.98e-18	4.38e-16	2.88e-16	D2105061953_1_rna-CHLNCDRAFT_52200_R0/D2105061953_1_rna-CHLNCDRAFT_144091_R0/GCA_002284615.2_KAF5827739.1/GCA_002284615.2_KAF5836837.1/KAA6417271.1_GCA_008636185/KAA6419227.1_GCA_008636185/KAK9821611.1_GCA_040144335/KAK9866118.1_GCA_040144375/KAK9812616.1_GCA_040144395/CAL8463823.1_GCA_964261555/CAL8463824.1_GCA_964261555/CAL8465088.1_GCA_964261555/CAL8468390.1_GCA_964261555/D2105061953_2_rna-gnl…	36	biological_process	Monoatomic ion transport
GO:0072488	ammonium transmembrane transport	8.76e-10	1.71e-08	1.13e-08	D2105061953_1_rna-CHLNCDRAFT_141357_R0/D2105061953_1_rna-CHLNCDRAFT_56592_R0/D2105061953_1_rna-CHLNCDRAFT_136742_R0/GCA_002284615.2_KAF5826679.1/GCA_002284615.2_KAF5827019.1/GCA_002284615.2_KAF5827022.1/GCA_002284615.2_KAF5827023.1/GCA_002284615.2_KAF5828947.1/GCA_002284615.2_KAF5834280.1/GCA_002284615.2_KAF5842532.1/KAA6422825.1_GCA_008636185/KAA6424415.1_GCA_008636185/KAK9856103.1_GCA_040144375…	16	biological_process	Ammonium transmembrane transport
GO:0044528	regulation of mitochondrial mRNA stability	9.24e-09	1.5e-07	9.89e-08	KAA6418667.1_GCA_008636185/KAA6419839.1_GCA_008636185/KAA6423261.1_GCA_008636185/KAA6428199.1_GCA_008636185/BDA46187.1_GCA_020887355/KAK9861763.1_GCA_040144375/KAK9861764.1_GCA_040144375/CAL8462328.1_GCA_964261555/CAL8464418.1_GCA_964261555	9	biological_process	Phosphate ion transport
GO:0000725	recombinational repair	2.49e-07	3.03e-06	2e-06	D2010028365_2_rna-gnl|jgi|COCSUDRAFT_mRNA61489_R0/D2010028366_2_rna-gnl|jgi|COCSUDRAFT_mRNA61489_R0/D2203116319_2_rna-gnl|jgi|COCSUDRAFT_mRNA61489_R0/GCA_002284615.2_KAF5830422.1/KAA6420350.1_GCA_008636185/CAL8461755.1_GCA_964261555	6	biological_process	Inorganic phosphate transmembrane transporter activity
GO:0006817	phosphate ion transport	1.17e-06	1.27e-05	8.35e-06	D2105061953_3_rna-gnl|WGS_JADXDR|g979.t1_R0/D2105061953_1_rna-CHLNCDRAFT_33297_R0/D2105061953_1_rna-CHLNCDRAFT_133070_R0/D2203116319_2_rna-gnl|jgi|COCSUDRAFT_mRNA61344_R0/GCA_002284615.2_KAF5827411.1/GCA_002284615.2_KAF5835955.1/GCA_002284615.2_KAF5835960.1/KAA6416703.1_GCA_008636185/KAL0034361.1_GCA_040206735/CAL8461919.1_GCA_964261555/CAL8461932.1_GCA_964261555/CAL8471759.1_GCA_964261555	12	biological_process	Oligopeptide transmembrane transporter activity
GO:0051260	protein homooligomerization	5.04e-06	4.68e-05	3.08e-05	D2010028365_2_rna-gnl|jgi|COCSUDRAFT_mRNA44861_R0/D2010028366_2_rna-gnl|jgi|COCSUDRAFT_mRNA44861_R0/D2203116319_2_rna-gnl|jgi|COCSUDRAFT_mRNA44861_R0/GCA_002284615.2_KAF5836015.1/GCA_002284615.2_KAF5840327.1/KAA6417776.1_GCA_008636185/KAA6427074.1_GCA_008636185/CAL8462634.1_GCA_964261555/CAL8464649.1_GCA_964261555/CAL8465005.1_GCA_964261555/CAL8471568.1_GCA_964261555/KAK9822561.1_GCA_040144355	12	biological_process	Symporter activity
GO:0006368	transcription elongation by RNA polymerase II	8.62e-05	0.000646755	0.000425933	GCA_000143455.1_EFJ52961.1/GCA_002284615.2_KAF5828078.1/KAA6426968.1_GCA_008636185/KAI7836149.1_GCA_025026875/KAL0031618.1_GCA_040206735/KAL0051612.1_GCA_040206745/KAL0051613.1_GCA_040206745/CAL8468040.1_GCA_964261555	8	biological_process	Ammonium transmembrane transporter activity
GO:0009228	thiamine biosynthetic process	0.000106642	0.000770194	0.000507226	D2105061953_3_rna-gnl|WGS_JADXDR|g2870.t1_R0/GCA_002284615.2_KAF5825434.1/GCA_002284615.2_KAF5835570.1/GCA_002284615.2_KAF5835571.1/KAA6419811.1_GCA_008636185/KAA6419824.1_GCA_008636185/CAL8467938.1_GCA_964261555	7	biological_process	Xenobiotic transmembrane transporter activity
GO:0046168	glycerol-3-phosphate catabolic process	0.000465287	0.00259231	0.00170722	D2105061953_2_rna-gnl|WGS_LHPF|mrna.C2E20_2061_R0/D2203116319_3_rna-gnl|WGS_LHPF|mrna.C2E20_2061_R0/GCA_002284615.2_KAF5826994.1/GCA_002284615.2_KAF5828644.1/GCA_002284615.2_KAF5831797.1/GCA_002284615.2_KAF5835953.1/CAL8468692.1_GCA_964261555	7	biological_process	Chloride channel activity
GO:0000723	telomere maintenance	0.000618486	0.00325959	0.00214666	D2105061953_2_rna-gnl|WGS_LHPF|mrna.C2E20_3138_R0/D2105061953_2_rna-gnl|WGS_LHPF|mrna.C2E20_3602_R0/KDD76138.1_GCA_000690575/GCA_002284615.2_KAF5843371.1/KAA6419235.1_GCA_008636185/KAA6426372.1_GCA_008636185/KAL0027611.1_GCA_040206755/CAL8463664.1_GCA_964261555/CAL8472054.1_GCA_964261555	9	biological_process	Channel activity
GO:0006465	signal peptide processing	0.00145483	0.00691931	0.00455685	D2010028353_3_rna-gnl|WGS_JADXDR|g9061.t1_R0/D2105061953_2_rna-gnl|WGS_LHPF|mrna.C2E20_3003_R0/D2105061953_3_rna-gnl|WGS_JADXDR|g9061.t1_R0/D2203116305_3_rna-gnl|WGS_JADXDR|g9061.t1_R0/GCA_002284615.2_KAF5833879.1/GCA_002284615.2_KAF5837263.1/KAA6428554.1_GCA_008636185/KAA6429458.1_GCA_008636185/CAL8461796.1_GCA_964261555/CAL8470873.1_GCA_964261555	10	biological_process	Transport相关功能
GO:0006302	double-strand break repair	0.00327185	0.0127602	0.0084035	D2105061953_1_rna-CHLNCDRAFT_134275_R0/GCA_002284615.2_KAF5838701.1/KAA6423702.1_GCA_008636185/KAK9786173.1_GCA_040144405/CAL8471396.1_GCA_964261555	5	biological_process	修复与重组
GO:0006298	mismatch repair	0.00393253	0.0150361	0.00990234	D2105061953_1_rna-CHLNCDRAFT_144556_R0/GCA_002284615.2_KAF5825467.1/KAA6427488.1_GCA_008636185/KAA6427813.1_GCA_008636185/BDA46612.1_GCA_020887355/CAL8471224.1_GCA_964261555/D2105061953_3_rna-gnl|WGS_JADXDR|g1852.t1_R0/GCA_002284615.2_KAF5832291.1/KAA6427202.1_GCA_008636185/KAL0023612.1_GCA_040206735/CAL8460672.1_GCA_964261555/D2105061953_3_rna-gnl|WGS_JADXDR|g121.t1_R0/KAA6420130.1_GCA_008636185…	15	biological_process	Recombinational repair
GO:0016540	protein autoprocessing	0.00434599	0.0162974	0.010733	D2105061953_1_rna-CHLNCDRAFT_136623_R0/KAK9844617.1_GCA_040144355/CAL8465466.1_GCA_964261555/CAL8465764.1_GCA_964261555/CAL8465778.1_GCA_964261555	5	biological_process	Double-strand break repair
GO:0001682	tRNA 5'-leader removal	0.00629754	0.0227411	0.0149766	D2105061953_3_rna-gnl|WGS_JADXDR|g8947.t1_R0/GCA_002284615.2_KAF5831184.1/KAA6422819.1_GCA_008636185/KAI7837361.1_GCA_025026875/CAL8470010.1_GCA_964261555/GCA_002284615.2_KAF5830714.1	6	biological_process	Mismatch repair
GO:0030638	polyketide metabolic process	0.00706739	0.0248088	0.0163383	GCA_002284615.2_KAF5827489.1/GCA_002284615.2_KAF5840896.1/KAI7842861.1_GCA_025026875/CAL8463046.1_GCA_964261555	4	biological_process	Telomere maintenance
GO:0000160	phosphorelay signal transduction system	0.00712459	0.0248088	0.0163383	GCA_002284615.2_KAF5833621.1/GCA_002284615.2_KAF5843520.1/KAA6426621.1_GCA_008636185/CAL8463405.1_GCA_964261555/GCA_002284615.2_KAF5830449.1/KAA6420686.1_GCA_008636185/CAL8463505.1_GCA_964261555/PSC67961.1_GCA_002245815/CAL8470081.1_GCA_964261555/GCA_002284615.2_KAF5840798.1/CAL8462462.1_GCA_964261555	11	biological_process	Mismatched DNA binding
GO:0071586	CAAX-box protein processing	0.0135622	0.0448243	0.0295199	KAA6419198.1_GCA_008636185/KAA6429771.1_GCA_008636185/CAL8463074.1_GCA_964261555/D2105061953_2_rna-gnl|WGS_LHPF|mrna.C2E20_4781_R0/GCA_002284615.2_KAF5828750.1/KAA6428741.1_GCA_008636185/CAL8460576.1_GCA_964261555	7	biological_process	调控与稳定
GO:0030286	dynein complex	1.13e-16	4.42e-15	2.91e-15	GCA_000143455.1_EFJ49461.1/GCA_002284615.2_KAF5829736.1/GCA_002284615.2_KAF5830263.1/GCA_002284615.2_KAF5830264.1/GCA_002284615.2_KAF5830265.1/GCA_002284615.2_KAF5831207.1/GCA_002284615.2_KAF5831208.1/GCA_002284615.2_KAF5833109.1/GCA_002284615.2_KAF5835531.1/GCA_002284615.2_KAF5835815.1/GCA_002284615.2_KAF5838996.1/GCA_002284615.2_KAF5838997.1/GCA_002284615.2_KAF5841773.1/GCA_002284615.2_KAF58421…	28	cellular_component	Regulation of mitochondrial mRNA stability
GO:0070449	elongin complex	2.64e-09	4.67e-08	3.08e-08	GCA_000143455.1_EFJ52961.1/GCA_002284615.2_KAF5828078.1/KAA6426968.1_GCA_008636185/KAI7836149.1_GCA_025026875/KAL0031618.1_GCA_040206735/KAL0051612.1_GCA_040206745/KAL0051613.1_GCA_040206745/CAL8468040.1_GCA_964261555	8	cellular_component	Phosphorelay signal transduction system
GO:0045277	respiratory chain complex IV	6.53e-06	5.53e-05	3.64e-05	D2105061953_1_rna-CHLNCDRAFT_138605_R0/GCA_002284615.2_KAF5826426.1/KAA6422881.1_GCA_008636185/KAK9837618.1_GCA_040144355/KAK9861086.1_GCA_040144375/KAK9861087.1_GCA_040144375/KAL0024612.1_GCA_040206735/CAL8468714.1_GCA_964261555/CAL8471171.1_GCA_964261555	9	cellular_component	生物合成过程
GO:0005758	mitochondrial intermembrane space	0.000260551	0.00158773	0.00104563	D2105061953_3_rna-gnl|WGS_JADXDR|g2374.t1_R0/GCA_002284615.2_KAF5827683.1/BDA50161.1_GCA_020887355/CAL8465331.1_GCA_964261555	4	cellular_component	Thiamine biosynthetic process
GO:0030289	protein phosphatase 4 complex	0.000563952	0.00305474	0.00201176	D2105061953_1_rna-CHLNCDRAFT_135782_R0/GCA_002284615.2_KAF5828134.1/KAA6421420.1_GCA_008636185/CAL8467361.1_GCA_964261555	4	cellular_component	Polyketide metabolic process
GO:0061617	MICOS complex	0.00091441	0.00457205	0.00301101	D2105061953_3_rna-gnl|WGS_JADXDR|g9048.t1_R0/GCA_002284615.2_KAF5837576.1/KAA6421323.1_GCA_008636185/CAL8460611.1_GCA_964261555	4	cellular_component	代谢过程
GO:0034998	oligosaccharyltransferase I complex	0.00190091	0.0080582	0.00530688	GCA_002284615.2_KAF5839899.1/KAI7837761.1_GCA_025026875/CAL8464621.1_GCA_964261555	3	cellular_component	Glycerol-3-phosphate catabolic process
GO:0030677	ribonuclease P complex	0.00200738	0.00832847	0.00548488	D2105061953_3_rna-gnl|WGS_JADXDR|g8947.t1_R0/GCA_002284615.2_KAF5831184.1/KAA6422819.1_GCA_008636185/KAI7837361.1_GCA_025026875/CAL8470010.1_GCA_964261555/GCA_002284615.2_KAF5830714.1	6	cellular_component	Fructose-bisphosphate aldolase activity
GO:0005739	mitochondrion	0.00255704	0.010176	0.00670157	D2105061953_1_rna-CHLNCDRAFT_138605_R0/GCA_002284615.2_KAF5826426.1/KAA6422881.1_GCA_008636185/KAK9837618.1_GCA_040144355/KAK9861086.1_GCA_040144375/KAK9861087.1_GCA_040144375/KAL0024612.1_GCA_040206735/CAL8468714.1_GCA_964261555/CAL8471171.1_GCA_964261555/D2105061953_1_rna-CHLNCDRAFT_22735_R0/GCA_002284615.2_KAF5838012.1	11	cellular_component	Chlorophyllide a oxygenase [overall] activity
GO:0043231	intracellular membrane-bounded organelle	0.0118111	0.0404065	0.0266105	GCA_002284615.2_KAF5830071.1/CAL8470075.1_GCA_964261555	2	cellular_component	Carbonate dehydratase activity
GO:0008569	minus-end-directed microtubule motor activity	4.82e-21	9.4e-19	6.19e-19	GCA_000143455.1_EFJ49461.1/GCA_002284615.2_KAF5829736.1/GCA_002284615.2_KAF5830263.1/GCA_002284615.2_KAF5830264.1/GCA_002284615.2_KAF5830265.1/GCA_002284615.2_KAF5831207.1/GCA_002284615.2_KAF5831208.1/GCA_002284615.2_KAF5833109.1/GCA_002284615.2_KAF5835531.1/GCA_002284615.2_KAF5835815.1/GCA_002284615.2_KAF5838996.1/GCA_002284615.2_KAF5838997.1/GCA_002284615.2_KAF5841773.1/GCA_002284615.2_KAF58421…	28	molecular_function	蛋白质聚合与加工
GO:0016702	"oxidoreductase activity, acting on single donors with incorporation of molecular oxygen, incorporation of two atoms of oxygen"	3.47e-20	3.38e-18	2.23e-18	D2105061953_1_rna-CHLNCDRAFT_134121_R0/GCA_002284615.2_KAF5831298.1/GCA_002284615.2_KAF5842137.1/KAA6417592.1_GCA_008636185/KAA6421500.1_GCA_008636185/KAA6428615.1_GCA_008636185/KAL0053616.1_GCA_040206745/CAL8462447.1_GCA_964261555/CAL8465040.1_GCA_964261555/CAL8467343.1_GCA_964261555/D2010028365_2_rna-gnl|jgi|COCSUDRAFT_mRNA38161_R0/D2010028366_2_rna-gnl|jgi|COCSUDRAFT_mRNA38161_R0/D2105061953_1…	35	molecular_function	Protein homooligomerization
GO:0005216	monoatomic ion channel activity	2.59e-18	1.68e-16	1.11e-16	D2105061953_1_rna-CHLNCDRAFT_52200_R0/D2105061953_1_rna-CHLNCDRAFT_144091_R0/GCA_002284615.2_KAF5827739.1/GCA_002284615.2_KAF5836837.1/KAA6417271.1_GCA_008636185/KAA6419227.1_GCA_008636185/KAK9821611.1_GCA_040144335/KAK9866118.1_GCA_040144375/KAK9812616.1_GCA_040144395/CAL8463823.1_GCA_964261555/CAL8463824.1_GCA_964261555/CAL8465088.1_GCA_964261555/CAL8468390.1_GCA_964261555/D2105061953_2_rna-gnl…	36	molecular_function	Protein autoprocessing
GO:0004332	fructose-bisphosphate aldolase activity	5.19e-13	1.69e-11	1.11e-11	D2105061953_1_rna-CHLNCDRAFT_59826_R0/D2105061953_1_rna-CHLNCDRAFT_37179_R0/D2105061953_3_rna-gnl|WGS_JADXDR|g5897.t1_R0/GCA_002284615.2_KAF5828396.1/GCA_002284615.2_KAF5836483.1/GCA_002284615.2_KAF5836495.1/GCA_002284615.2_KAF5836500.1/GCA_002284615.2_KAF5836501.1/GCA_002284615.2_KAF5838972.1/KAA6421520.1_GCA_008636185/KAA6427607.1_GCA_008636185/KAI8106103.1_GCA_025209375/CAL0291619.1_GCA_964019…	19	molecular_function	Signal peptide processing
GO:0005254	chloride channel activity	1.56e-12	4.35e-11	2.87e-11	D2010028353_1_rna-CHLNCDRAFT_141619_R2/D2105061953_1_rna-CHLNCDRAFT_58489_R0/D2105061953_1_rna-CHLNCDRAFT_143620_R3/D2105061953_1_rna-CHLNCDRAFT_143620_R0/D2105061953_1_rna-CHLNCDRAFT_58489_R2/D2105061953_1_rna-CHLNCDRAFT_34835_R0/D2105061953_1_rna-CHLNCDRAFT_136634_R0/D2105061953_1_rna-CHLNCDRAFT_137443_R0/D2105061953_2_rna-gnl|WGS_LHPF|mrna.C2E20_1304_R0/D2203116305_1_rna-CHLNCDRAFT_141619_R0/G…	25	molecular_function	CAAX-box protein processing
GO:0033743	peptide-methionine (R)-S-oxide reductase activity	1.56e-11	3.79e-10	2.5e-10	D2105061953_1_rna-CHLNCDRAFT_18624_R0/GCA_002284615.2_KAF5837739.1/GCA_002284615.2_KAF5840421.1/KAA6420569.1_GCA_008636185/KAK9861776.1_GCA_040144375/KAK9861777.1_GCA_040144375/KAL0033618.1_GCA_040206755/CAL8463493.1_GCA_964261555/D2105061953_2_rna-gnl|WGS_LHPF|mrna.C2E20_3995_R0/D2105061953_3_rna-gnl|WGS_JADXDR|g3380.t1_R0/GCA_002284615.2_KAF5833997.1/KAA6418339.1_GCA_008636185/KAA6422596.1_GCA_…	15	molecular_function	Copper chaperone activity
GO:0008519	ammonium transmembrane transporter activity	8.76e-10	1.71e-08	1.13e-08	D2105061953_1_rna-CHLNCDRAFT_141357_R0/D2105061953_1_rna-CHLNCDRAFT_56592_R0/D2105061953_1_rna-CHLNCDRAFT_136742_R0/GCA_002284615.2_KAF5826679.1/GCA_002284615.2_KAF5827019.1/GCA_002284615.2_KAF5827022.1/GCA_002284615.2_KAF5827023.1/GCA_002284615.2_KAF5828947.1/GCA_002284615.2_KAF5834280.1/GCA_002284615.2_KAF5842532.1/KAA6422825.1_GCA_008636185/KAA6424415.1_GCA_008636185/KAK9856103.1_GCA_040144375…	16	molecular_function	复合体
GO:0009378	four-way junction helicase activity	4.24e-08	6.36e-07	4.19e-07	D2010028365_2_rna-gnl|jgi|COCSUDRAFT_mRNA36149_R0/D2010028366_2_rna-gnl|jgi|COCSUDRAFT_mRNA36149_R0/D2105061953_2_rna-gnl|WGS_LHPF|mrna.C2E20_4458B_R0/D2203116319_2_rna-gnl|jgi|COCSUDRAFT_mRNA36149_R0/GCA_002284615.2_KAF5833969.1/GCA_002284615.2_KAF5833970.1/GCA_002284615.2_KAF5837146.1/KAA6418217.1_GCA_008636185/KAA6418997.1_GCA_008636185/KAA6420376.1_GCA_008636185/KAI8103361.1_GCA_025209375/KAK…	28	molecular_function	Dynein complex
GO:0051537	"2 iron, 2 sulfur cluster binding"	6.9e-08	9.61e-07	6.33e-07	D2105061953_1_rna-CHLNCDRAFT_137589_R0/D2105061953_2_rna-gnl|WGS_LHPF|mrna.C2E20_7532_R0/EFN56114.1_GCA_000147415/GCA_002284615.2_KAF5831106.1/GCA_002284615.2_KAF5835124.1/KAA6417833.1_GCA_008636185/KAA6419455.1_GCA_008636185/KAA6425884.1_GCA_008636185/CAL0296115.1_GCA_964019345/CAL8461938.1_GCA_964261555/CAL8461939.1_GCA_964261555/CAL8461986.1_GCA_964261555/CAL8461987.1_GCA_964261555/CAL8465289.…	27	molecular_function	Elongin complex
GO:0010277	chlorophyllide a oxygenase [overall] activity	1.6e-07	2.08e-06	1.37e-06	D2105061953_1_rna-CHLNCDRAFT_51738_R0/EFN56114.1_GCA_000147415/GCA_002284615.2_KAF5831106.1/KAA6417833.1_GCA_008636185/KAA6419455.1_GCA_008636185/KAA6425884.1_GCA_008636185/KAK9814616.1_GCA_040144395/CAL0296115.1_GCA_964019345/CAL8461938.1_GCA_964261555/CAL8461939.1_GCA_964261555/CAL8461986.1_GCA_964261555/CAL8461987.1_GCA_964261555/CAL8465289.1_GCA_964261555/CAL8469852.1_GCA_964261555/CAL8472283…	17	molecular_function	Respiratory chain complex IV
GO:0005315	inorganic phosphate transmembrane transporter activity	1.17e-06	1.27e-05	8.35e-06	D2105061953_3_rna-gnl|WGS_JADXDR|g979.t1_R0/D2105061953_1_rna-CHLNCDRAFT_33297_R0/D2105061953_1_rna-CHLNCDRAFT_133070_R0/D2203116319_2_rna-gnl|jgi|COCSUDRAFT_mRNA61344_R0/GCA_002284615.2_KAF5827411.1/GCA_002284615.2_KAF5835955.1/GCA_002284615.2_KAF5835960.1/KAA6416703.1_GCA_008636185/KAL0034361.1_GCA_040206735/CAL8461919.1_GCA_964261555/CAL8461932.1_GCA_964261555/CAL8471759.1_GCA_964261555	12	molecular_function	Mitochondrial intermembrane space
GO:0015293	symporter activity	2.17e-06	2.22e-05	1.46e-05	D2105061953_2_rna-gnl|WGS_LHPF|mrna.C2E20_6702_R0/KAA6416516.1_GCA_008636185/KAA6428505.1_GCA_008636185/KAK9806122.1_GCA_040144395/CAL0297061.1_GCA_964019345/CAL8461610.1_GCA_964261555/CAL8471163.1_GCA_964261555	7	molecular_function	Protein phosphatase 4 complex
GO:0015267	channel activity	2.76e-06	2.69e-05	1.77e-05	KAL0046195.1_GCA_040206745/D2105061953_3_rna-gnl|WGS_JADXDR|g1159.t1_R0/GCA_002284615.2_KAF5832139.1/KAA6416698.1_GCA_008636185/KAA6417352.1_GCA_008636185/KAA6417646.1_GCA_008636185/KAA6417678.1_GCA_008636185/KAA6417698.1_GCA_008636185/KAA6418398.1_GCA_008636185/KAA6426741.1_GCA_008636185/KAA6429575.1_GCA_008636185/BDA43616.1_GCA_020887355/CAK0781615.1_GCA_963575595/CAL8468431.1_GCA_964261555/CAL…	17	molecular_function	MICOS complex
GO:0019825	oxygen binding	5.33e-06	4.72e-05	3.11e-05	D2105061953_1_rna-CHLNCDRAFT_18852_R0/GCA_002284615.2_KAF5832004.1/KAA6423983.1_GCA_008636185/KAA6423985.1_GCA_008636185/KAA6426908.1_GCA_008636185/WPT16176.1_GCA_034226945/CAL8465084.1_GCA_964261555/CAL8471141.1_GCA_964261555	8	molecular_function	Oligosaccharyltransferase I complex
GO:0035673	oligopeptide transmembrane transporter activity	7.89e-06	6.41e-05	4.22e-05	GCA_002284615.2_KAF5836148.1/KAA6422430.1_GCA_008636185/BDA46176.1_GCA_020887355/KAK9906619.1_GCA_040182555/CAL8462318.1_GCA_964261555/CAL8464395.1_GCA_964261555/KAA6425640.1_GCA_008636185/CAL8466363.1_GCA_964261555	8	molecular_function	Ribonuclease P complex
GO:0016817	"hydrolase activity, acting on acid anhydrides"	3.05e-05	0.000238221	0.000156885	D2105061953_1_rna-CHLNCDRAFT_135006_R0/D2105061953_1_rna-CHLNCDRAFT_19567_R1/D2105061953_2_rna-gnl|WGS_LHPF|mrna.C2E20_5115_R0/GCA_002284615.2_KAF5838452.1/GCA_002284615.2_KAF5840415.1/BDA46196.1_GCA_020887355/KAL0019761.1_GCA_040206755/CAL8462337.1_GCA_964261555/CAL8463576.1_GCA_964261555	9	molecular_function	燃料与能量
GO:0008237	metallopeptidase activity	0.000200509	0.0013964	0.000919628	D2105061953_2_rna-gnl|WGS_LHPF|mrna.C2E20_1992A_R0/GCA_002284615.2_KAF5826792.1/KAA6422611.1_GCA_008636185/KAA6423170.1_GCA_008636185/KAA6429214.1_GCA_008636185/KAK9861578.1_GCA_040144375/KAK9861579.1_GCA_040144375/CAL0298261.1_GCA_964019345/CAL8464899.1_GCA_964261555/CAL8467455.1_GCA_964261555	10	molecular_function	Oxygen binding
GO:0016811	"hydrolase activity, acting on carbon-nitrogen (but not peptide) bonds, in linear amides"	0.000224875	0.00151209	0.000995815	D2105061953_3_rna-gnl|WGS_JADXDR|g5126.t1_R0/GCA_002284615.2_KAF5826324.1/GCA_002284615.2_KAF5833704.1/KAA6418437.1_GCA_008636185/KAK9861275.1_GCA_040144375/CAL8471307.1_GCA_964261555/CAL8471308.1_GCA_964261555	7	molecular_function	Electron transfer activity
GO:0004045	aminoacyl-tRNA hydrolase activity	0.000250215	0.00158773	0.00104563	D2105061953_2_rna-gnl|WGS_LHPF|mrna.C2E20_4334_R0/D2105061953_1_rna-CHLNCDRAFT_51456_R0/GCA_002284615.2_KAF5834198.1/KAA6418828.1_GCA_008636185/KAA6424092.1_GCA_008636185/KAK2078616.1_GCA_031763795/KAK9812610.1_GCA_040144395/CAL8464016.1_GCA_964261555/CAL8465413.1_GCA_964261555	9	molecular_function	ATP-dependent peptidase activity
GO:0016531	copper chaperone activity	0.000260551	0.00158773	0.00104563	D2105061953_3_rna-gnl|WGS_JADXDR|g2374.t1_R0/GCA_002284615.2_KAF5827683.1/BDA50161.1_GCA_020887355/CAL8465331.1_GCA_964261555	4	molecular_function	活性
GO:0004089	carbonate dehydratase activity	0.000412113	0.00242625	0.00159786	D2105061953_3_rna-gnl|WGS_JADXDR|g5399.t1_R0/D2105061953_1_rna-CHLNCDRAFT_26430_R0/GCA_000143455.1_EFJ47613.1/KAA6419577.1_GCA_008636185/KAA6423283.1_GCA_008636185/KAL0018161.1_GCA_040206735/CAL8463272.1_GCA_964261555/CAL8465564.1_GCA_964261555	8	molecular_function	Minus-end-directed microtubule motor activity
GO:0004176	ATP-dependent peptidase activity	0.000423039	0.00242625	0.00159786	D2105061953_2_rna-gnl|WGS_LHPF|mrna.C2E20_7258_R0/D2105061953_2_rna-gnl|WGS_LHPF|mrna.C2E20_2318_R0/GCA_002284615.2_KAF5827214.1/GCA_002284615.2_KAF5831580.1/GCA_002284615.2_KAF5835361.1/GCA_002284615.2_KAF5839068.1/KAA6419061.1_GCA_008636185/KAA6422718.1_GCA_008636185/KAA6426491.1_GCA_008636185/KAA6426817.1_GCA_008636185/KAK9861664.1_GCA_040144375/KAK9916188.1_GCA_040182555/CAL8466132.1_GCA_9642…	16	molecular_function	Four-way junction helicase activity
GO:0015299	obsolete solute:proton antiporter activity	0.000699979	0.003592	0.00236558	D2105061953_2_rna-gnl|WGS_LHPF|mrna.C2E20_6568_R0/EFN55361.1_GCA_000147415/KAA6418214.1_GCA_008636185/KAA6424800.1_GCA_008636185/KAA6425639.1_GCA_008636185/CAL8467972.1_GCA_964261555/CAL8471679.1_GCA_964261555/XP_005645361.1_GCF_000258705/D2105061953_1_rna-CHLNCDRAFT_143121_R0/D2105061953_3_rna-gnl|WGS_JADXDR|g1351.t1_R0/GCA_002284615.2_KAF5841730.1/KAA6419541.1_GCA_008636185/KAA6422330.1_GCA_008…	16	molecular_function	Hydrolase activity, acting on acid anhydrides
GO:0008417	fucosyltransferase activity	0.0010734	0.00523281	0.00344617	D2105061953_2_rna-gnl|WGS_LHPF|mrna.C2E20_0331_R0/GCA_002284615.2_KAF5826593.1/GCA_002284615.2_KAF5829001.1/CAL8464973.1_GCA_964261555/CAL8464974.1_GCA_964261555	5	molecular_function	Hydrolase activity, acting on carbon-nitrogen (but not peptide) bonds, in linear amides
GO:0033925	mannosyl-glycoprotein endo-beta-N-acetylglucosaminidase activity	0.00158845	0.00737497	0.00485693	D2105061953_1_rna-CHLNCDRAFT_53027_R0/GCA_002284615.2_KAF5835216.1/KAA6428553.1_GCA_008636185/CAL8470865.1_GCA_964261555	4	molecular_function	Aminoacyl-tRNA hydrolase activity
GO:0008171	O-methyltransferase activity	0.00176562	0.0080069	0.0052731	D2203116319_2_rna-gnl|jgi|COCSUDRAFT_mRNA66185_R0/GCA_002284615.2_KAF5831954.1/GCA_002284615.2_KAF5831955.1/GCA_002284615.2_KAF5831956.1/KAK9861340.1_GCA_040144375/CAL8465229.1_GCA_964261555/CAL8465373.1_GCA_964261555/GCA_002284615.2_KAF5838081.1/KAA6421748.1_GCA_008636185/KAA6423602.1_GCA_008636185/KAA6426605.1_GCA_008636185	11	molecular_function	Peptide-methionine (R)-S-oxide reductase activity
GO:0015297	antiporter activity	0.0018987	0.0080582	0.00530688	D2105061953_3_rna-gnl|WGS_JADXDR|g7434.t1_R0/GCA_002284615.2_KAF5830679.1/KAA6422116.1_GCA_008636185/KAK9868361.1_GCA_040144375/KAL0036111.1_GCA_040206755/CAL8462431.1_GCA_964261555/D2105061953_3_rna-gnl|WGS_JADXDR|g2339.t1_R0/GCA_002284615.2_KAF5829359.1/GCA_002284615.2_KAF5839083.1/KAA6417408.1_GCA_008636185/KAA6418727.1_GCA_008636185/KAA6423129.1_GCA_008636185/CAL8468558.1_GCA_964261555/CAL846…	14	molecular_function	Metallopeptidase activity
GO:0042910	xenobiotic transmembrane transporter activity	0.0018987	0.0080582	0.00530688	D2105061953_3_rna-gnl|WGS_JADXDR|g7434.t1_R0/GCA_002284615.2_KAF5830679.1/KAA6422116.1_GCA_008636185/KAK9868361.1_GCA_040144375/KAL0036111.1_GCA_040206755/CAL8462431.1_GCA_964261555/D2105061953_3_rna-gnl|WGS_JADXDR|g2339.t1_R0/GCA_002284615.2_KAF5829359.1/GCA_002284615.2_KAF5839083.1/KAA6417408.1_GCA_008636185/KAA6418727.1_GCA_008636185/KAA6423129.1_GCA_008636185/CAL8468558.1_GCA_964261555/CAL846…	14	molecular_function	N,N-dimethylaniline monooxygenase activity
GO:0004499	"N,N-dimethylaniline monooxygenase activity"	0.00214702	0.00872227	0.00574422	GCA_002284615.2_KAF5834854.1/KAA6418357.1_GCA_008636185/CAL8462038.1_GCA_964261555/CAL8463558.1_GCA_964261555/CAL8465411.1_GCA_964261555/XP_005652161.1_GCF_000258705/GCA_002284615.2_KAF5836179.1	7	molecular_function	Oxidoreductase activity, acting on single donors with incorporation of molecular oxygen, incorporation of two atoms of oxygen
GO:0009055	electron transfer activity	0.00597433	0.021981	0.014476	GCA_002284615.2_KAF5825312.1/CAL8471888.1_GCA_964261555/D2010028353_3_rna-gnl|WGS_JADXDR|g6461.t1_R0/D2105061953_3_rna-gnl|WGS_JADXDR|g6461.t1_R0/D2203116305_3_rna-gnl|WGS_JADXDR|g6461.t1_R0/GCA_002284615.2_KAF5833745.1/KAI8110961.1_GCA_025209345/KAK9839612.1_GCA_040144335/CAL8467335.1_GCA_964261555/KAI3423561.1_GCA_023343905	10	molecular_function
GO:0030983	mismatched DNA binding	0.0125145	0.0420746	0.0277091	D2105061953_1_rna-CHLNCDRAFT_144556_R0/GCA_002284615.2_KAF5825467.1/KAA6427488.1_GCA_008636185/KAA6427813.1_GCA_008636185/BDA46612.1_GCA_020887355/CAL8471224.1_GCA_964261555/D2105061953_3_rna-gnl|WGS_JADXDR|g1852.t1_R0/GCA_002284615.2_KAF5832291.1/KAA6427202.1_GCA_008636185/KAL0023612.1_GCA_040206735/CAL8460672.1_GCA_964261555/KAA6420130.1_GCA_008636185/CAL8470329.1_GCA_964261555	13	molecular_function

## Sheet: Supplementary table4
ID	Description	pvalue	p.adjust	qvalue	geneID	Count
GO:0009308	amine metabolic process	1.68e-08	2.17e-07	1.37e-07	KAK9830963.1_GCA_040144335/D2203116305_1_rna-CHLNCDRAFT_58054_R1/D2203116305_2_rna-gnl|WGS_LHPF|mrna.C2E20_4454_R0/D2203116319_2_rna-gnl|jgi|COCSUDRAFT_mRNA28332_R0/D2203116319_2_rna-gnl|jgi|COCSUDRAFT_mRNA29142_R0/KAA6416614.1_GCA_008636185/KAA6418190.1_GCA_008636185/KAA6425374.1_GCA_008636185/KAA6429556.1_GCA_008636185/CAK0763276.1_GCA_963575595/CAK0784920.1_GCA_963575595/CAK0786627.1_GCA_96357…	13	biological_process
GO:0072488	ammonium transmembrane transport	3.59e-09	6.34e-08	3.99e-08	D2203116305_1_rna-CHLNCDRAFT_141357_R0/D2203116305_1_rna-CHLNCDRAFT_56592_R0/D2203116305_1_rna-CHLNCDRAFT_136742_R0/D2203116319_2_rna-gnl|jgi|COCSUDRAFT_mRNA47532_R0/D2203116319_1_rna-CHLNCDRAFT_56592_R1/GCA_000143455.1_EFJ46377.1/GCA_000143455.1_EFJ48363.1/KAA6422825.1_GCA_008636185/KAA6424415.1_GCA_008636185/KAI7846332.1_GCA_025026875/KAK2078494.1_GCA_031763795/KAK2080248.1_GCA_031763795/CAK073…	16	biological_process
GO:0006821	chloride transport	0.0133754	0.0365468	0.0230029	D2203116319_2_rna-gnl|jgi|COCSUDRAFT_mRNA12729_R0/D2203116319_2_rna-gnl|jgi|COCSUDRAFT_mRNA30425_R0/KAA6419216.1_GCA_008636185/KAA6429120.1_GCA_008636185/KAK9808763.1_GCA_040144395/KAL0038636.1_GCA_040206755/CAK0770655.1_GCA_963575595/CAK0779478.1_GCA_963575595/CAK0785644.1_GCA_963575595	9	biological_process
GO:0006338	chromatin remodeling	0.00352811	0.0120079	0.00755791	D2203116319_2_rna-gnl|jgi|COCSUDRAFT_mRNA46779_R0/KAA6423305.1_GCA_008636185/KAA6426342.1_GCA_008636185/KAK2078135.1_GCA_031763795/CAK0743308.1_GCA_963575595/D2203116305_2_rna-gnl|WGS_LHPF|mrna.C2E20_8601_R0/GCA_000143455.1_EFJ46309.1	7	biological_process
GO:0006631	fatty acid metabolic process	4.9e-05	0.000319504	0.000201099	KAA6422017.1_GCA_008636185/CAK0786280.1_GCA_963575595/D2010028365_2_rna-gnl|jgi|COCSUDRAFT_mRNA37630_R0/D2010028366_2_rna-gnl|jgi|COCSUDRAFT_mRNA37630_R0/D2203116305_1_rna-CHLNCDRAFT_35480_R0/D2203116319_2_rna-gnl|jgi|COCSUDRAFT_mRNA37630_R0/KAA6428845.1_GCA_008636185/KAA6428999.1_GCA_008636185/KAK2078099.1_GCA_031763795/CAK0770867.1_GCA_963575595/CAK0787451.1_GCA_963575595	11	biological_process
GO:0030026	intracellular manganese ion homeostasis	2.02e-06	1.57e-05	9.89e-06	D2203116305_3_rna-gnl|WGS_JADXDR|g8724.t1_R0/D2203116319_2_rna-gnl|jgi|COCSUDRAFT_mRNA60838_R0/D2203116319_2_rna-gnl|jgi|COCSUDRAFT_mRNA60838_R1/KAA6420929.1_GCA_008636185/KAA6426803.1_GCA_008636185/KAK2075655.1_GCA_031763795/KAL0036398.1_GCA_040206735/CAK0778924.1_GCA_963575595/CAK0782383.1_GCA_963575595	9	biological_process
GO:0046373	L-arabinose metabolic process	8.36e-12	2.03e-10	1.28e-10	D2010028365_2_rna-gnl|jgi|COCSUDRAFT_mRNA56386_R1/D2010028365_2_rna-gnl|jgi|COCSUDRAFT_mRNA56386_R0/D2010028366_2_rna-gnl|jgi|COCSUDRAFT_mRNA56386_R1/D2010028366_2_rna-gnl|jgi|COCSUDRAFT_mRNA56386_R0/D2203116305_1_rna-CHLNCDRAFT_137674_R1/D2203116305_1_rna-CHLNCDRAFT_137674_R0/D2203116319_2_rna-gnl|jgi|COCSUDRAFT_mRNA56386_R1/KAA6420142.1_GCA_008636185/KAA6426821.1_GCA_008636185/KAK2080720.1_GCA_…	13	biological_process
GO:0030259	lipid glycosylation	0.00405218	0.0133241	0.00838631	KAA6419998.1_GCA_008636185/KAK2076996.1_GCA_031763795/CAK0783345.1_GCA_963575595/CAK0786710.1_GCA_963575595	4	biological_process
GO:0006811	monoatomic ion transport	1.26e-12	4.89e-11	3.08e-11	D2203116305_1_rna-CHLNCDRAFT_144091_R0/D2203116319_2_rna-gnl|jgi|COCSUDRAFT_mRNA67353_R1/D2203116319_2_rna-gnl|jgi|COCSUDRAFT_mRNA48935_R0/D2203116319_2_rna-gnl|jgi|COCSUDRAFT_mRNA67353_R0/KAA6417271.1_GCA_008636185/KAA6419227.1_GCA_008636185/KAL0022763.1_GCA_040206755/CAK0781779.1_GCA_963575595/CAK0781877.1_GCA_963575595/CAK0787224.1_GCA_963575595/CAL8463823.1_GCA_964261555/CAL8463824.1_GCA_9642…	31	biological_process
GO:0006334	nucleosome assembly	5.24e-05	0.000319504	0.000201099	D2203116305_3_rna-gnl|WGS_JADXDR|g10917.t1_R0/D2203116319_2_rna-gnl|jgi|COCSUDRAFT_mRNA49026_R0/D2203116319_2_rna-gnl|jgi|COCSUDRAFT_mRNA54749_R0/PSC74636.1_GCA_002245815/KAA6417441.1_GCA_008636185/KAA6424632.1_GCA_008636185/KAK2076989.1_GCA_031763795/KAK9839633.1_GCA_040144335/KAK9839634.1_GCA_040144335/CAK0787555.1_GCA_963575595/CAK0787586.1_GCA_963575595	11	biological_process
GO:0016310	phosphorylation	1.22e-06	1.03e-05	6.46e-06	D2203116319_1_rna-CHLNCDRAFT_37464_R1/KAA6417476.1_GCA_008636185/KAA6428767.1_GCA_008636185/KAK2077624.1_GCA_031763795/KAK2079302.1_GCA_031763795/KAK9863129.1_GCA_040144375/KAL0048463.1_GCA_040206745/CAK0757194.1_GCA_963575595/CAK0786441.1_GCA_963575595/CAK0787397.1_GCA_963575595/CAL8463861.1_GCA_964261555/D2203116305_3_rna-gnl|WGS_JADXDR|g7353.t1_R0/D2203116319_2_rna-gnl|jgi|COCSUDRAFT_mRNA83444…	15	biological_process
GO:0045893	positive regulation of DNA-templated transcription	0.00200887	0.00721704	0.00454246	D2203116305_3_rna-gnl|WGS_JADXDR|g4078.t1_R0/KAA6415273.1_GCA_008636185/BDA50763.1_GCA_020887355/CAK0787296.1_GCA_963575595	4	biological_process
GO:0071805	potassium ion transmembrane transport	2.91e-15	1.88e-13	1.18e-13	D2203116305_1_rna-CHLNCDRAFT_55134_R0/D2203116319_2_rna-gnl|jgi|COCSUDRAFT_mRNA37582_R3/D2203116319_2_rna-gnl|jgi|COCSUDRAFT_mRNA29836_R1/D2203116319_2_rna-gnl|jgi|COCSUDRAFT_mRNA29836_R0/KAA6416413.1_GCA_008636185/KAA6416422.1_GCA_008636185/KAA6416641.1_GCA_008636185/KAA6420619.1_GCA_008636185/KAA6420674.1_GCA_008636185/KAA6426043.1_GCA_008636185/BDA42863.1_GCA_020887355/KAK9863712.1_GCA_0401443…	22	biological_process
GO:0051260	protein homooligomerization	0.00130466	0.00527299	0.00331886	D2203116319_2_rna-gnl|jgi|COCSUDRAFT_mRNA44861_R0/D2203116319_2_rna-gnl|jgi|COCSUDRAFT_mRNA47024_R0/KAA6417776.1_GCA_008636185/KAA6427074.1_GCA_008636185/KAK9842639.1_GCA_040144375/CAK0785435.1_GCA_963575595/CAK0787165.1_GCA_963575595/CAK0787664.1_GCA_963575595/CAL8462634.1_GCA_964261555	9	biological_process
GO:0000725	recombinational repair	0.00366972	0.0122746	0.00772572	D2203116319_2_rna-gnl|jgi|COCSUDRAFT_mRNA61489_R0/KAA6420350.1_GCA_008636185/KAL0056463.1_GCA_040206745	3	biological_process
GO:0051726	regulation of cell cycle	0.00107965	0.00465451	0.00292959	D2203116305_3_rna-gnl|WGS_JADXDR|g6938.t1_R0/KAA6417524.1_GCA_008636185/KAA6420681.1_GCA_008636185/KAK9863068.1_GCA_040144375/CAK0738683.1_GCA_963575595/CAL8463595.1_GCA_964261555	6	biological_process
GO:0008272	sulfate transport	0.000263262	0.00134402	0.00084594	D2203116305_3_rna-gnl|WGS_JADXDR|g10697.t1_R0/D2203116305_2_rna-gnl|WGS_LHPF|mrna.C2E20_1005_R0/D2203116305_2_rna-gnl|WGS_LHPF|mrna.C2E20_7604_R0/D2203116319_2_rna-gnl|jgi|COCSUDRAFT_mRNA43213_R0/RMZ56343.1_GCA_003709365/KAA6425635.1_GCA_008636185/KAI3433639.1_GCA_023343905/KAK2077881.1_GCA_031763795/CAK0784376.1_GCA_963575595/CAK0785097.1_GCA_963575595	10	biological_process
GO:0000723	telomere maintenance	0.000296085	0.00147283	0.000927014	D2010028365_2_rna-gnl|jgi|COCSUDRAFT_mRNA63118_R0/D2010028366_2_rna-gnl|jgi|COCSUDRAFT_mRNA63118_R0/D2203116305_2_rna-gnl|WGS_LHPF|mrna.C2E20_3138_R0/D2203116305_2_rna-gnl|WGS_LHPF|mrna.C2E20_3602_R0/D2203116319_3_rna-gnl|WGS_LHPF|mrna.C2E20_3138_R0/D2203116319_2_rna-gnl|jgi|COCSUDRAFT_mRNA63118_R0/KAA6419235.1_GCA_008636185/KAA6426372.1_GCA_008636185/KAK9836342.1_GCA_040144335/CAL8463664.1_GCA_9…	10	biological_process
GO:0006729	tetrahydrobiopterin biosynthetic process	0.000907539	0.00400142	0.00251853	D2203116305_1_rna-CHLNCDRAFT_137157_R0/KAA6424436.1_GCA_008636185/KAK2077787.1_GCA_031763795/KAK2078189.1_GCA_031763795/CAK0784236.1_GCA_963575595/CAK0787906.1_GCA_963575595	6	biological_process
GO:0031083	BLOC-1 complex	0.00434268	0.0140413	0.00883774	D2203116319_2_rna-gnl|jgi|COCSUDRAFT_mRNA62896_R0/KAA6427392.1_GCA_008636185/CAK0787741.1_GCA_963575595	3	cellular_component
GO:0030286	dynein complex	3.29e-08	3.55e-07	2.23e-07	D2203116305_1_rna-CHLNCDRAFT_37234_R0/GCA_002284615.2_KAF5830263.1/RMZ56376.1_GCA_003709365/KAA6419077.1_GCA_008636185/KAA6419936.1_GCA_008636185/KAA6420380.1_GCA_008636185/KAA6420581.1_GCA_008636185/KAA6420695.1_GCA_008636185/KAA6421378.1_GCA_008636185/KAA6425804.1_GCA_008636185/KAA6425990.1_GCA_008636185/KAA6426289.1_GCA_008636185/KAA6427739.1_GCA_008636185/KAA6429049.1_GCA_008636185/KAK2077365…	19	cellular_component
GO:0070449	elongin complex	0.00879225	0.0258439	0.0162664	KAA6426968.1_GCA_008636185/KAK9901637.1_GCA_040182555/CAK0770826.1_GCA_963575595	3	cellular_component
GO:0000786	nucleosome	2.75e-07	2.67e-06	1.68e-06	D2203116305_3_rna-gnl|WGS_JADXDR|g10917.t1_R0/D2203116319_2_rna-gnl|jgi|COCSUDRAFT_mRNA49026_R0/D2203116319_2_rna-gnl|jgi|COCSUDRAFT_mRNA54749_R0/PSC74636.1_GCA_002245815/KAA6417441.1_GCA_008636185/KAA6424632.1_GCA_008636185/KAK2076989.1_GCA_031763795/KAK9839633.1_GCA_040144335/KAK9839634.1_GCA_040144335/CAK0787555.1_GCA_963575595/CAK0787586.1_GCA_963575595	11	cellular_component
GO:0000124	SAGA complex	0.00200887	0.00721704	0.00454246	D2203116305_3_rna-gnl|WGS_JADXDR|g4078.t1_R0/KAA6415273.1_GCA_008636185/BDA50763.1_GCA_020887355/CAK0787296.1_GCA_963575595	4	cellular_component
GO:0051537	"2 iron, 2 sulfur cluster binding"	4.81e-07	4.44e-06	2.8e-06	D2203116305_1_rna-CHLNCDRAFT_51738_R0/D2203116305_1_rna-CHLNCDRAFT_137589_R0/D2203116305_1_rna-CHLNCDRAFT_145588_R0/D2203116319_2_rna-gnl|jgi|COCSUDRAFT_mRNA46572_R4/D2203116319_2_rna-gnl|jgi|COCSUDRAFT_mRNA39968_R0/D2203116319_2_rna-gnl|jgi|COCSUDRAFT_mRNA62940_R0/D2203116319_2_rna-gnl|jgi|COCSUDRAFT_mRNA47272_R0/D2203116319_2_rna-gnl|jgi|COCSUDRAFT_mRNA47549_R0/GCA_000143455.1_EFJ43563.1/KAA641…	27	molecular_function
GO:0016817	"hydrolase activity, acting on acid anhydrides"	1.03e-05	7.15e-05	4.5e-05	D2203116305_2_rna-gnl|WGS_LHPF|mrna.C2E20_5115_R0/D2203116305_1_rna-CHLNCDRAFT_135006_R0/D2203116319_2_rna-gnl|jgi|COCSUDRAFT_mRNA28627_R0/BDA48563.1_GCA_020887355/KAI3437963.1_GCA_023343905/KAK2075836.1_GCA_031763795/KAK9817863.1_GCA_040144395/CAK0738141.1_GCA_963575595/CAK0752401.1_GCA_963575595/CAL8463576.1_GCA_964261555	10	molecular_function
GO:0004499	"N,N-dimethylaniline monooxygenase activity"	1.19e-08	1.92e-07	1.21e-07	D2203116305_3_rna-gnl|WGS_JADXDR|g2173.t1_R0/D2203116319_2_rna-gnl|jgi|COCSUDRAFT_mRNA27739_R0/D2203116319_2_rna-gnl|jgi|COCSUDRAFT_mRNA39236_R0/KAA6418357.1_GCA_008636185/KAK2077657.1_GCA_031763795/KAK9863763.1_GCA_040144375/CAK0733567.1_GCA_963575595/CAK0739800.1_GCA_963575595/CAK0783474.1_GCA_963575595/CAK0783741.1_GCA_963575595/CAK0786646.1_GCA_963575595/CAL0291638.1_GCA_964019345/CAL8463558.…	14	molecular_function
GO:0016702	"oxidoreductase activity, acting on single donors with incorporation of molecular oxygen, incorporation of two atoms of oxygen"	0.00223916	0.00789813	0.00497115	D2203116305_1_rna-CHLNCDRAFT_138368_R0/D2203116305_1_rna-CHLNCDRAFT_138368_R1/D2203116319_2_rna-gnl|jgi|COCSUDRAFT_mRNA29990_R0/D2203116319_2_rna-gnl|jgi|COCSUDRAFT_mRNA38161_R0/KAA6419489.1_GCA_008636185/CAK0785479.1_GCA_963575595/CAK0785635.1_GCA_963575595/CAL8463206.1_GCA_964261555/D2203116305_1_rna-CHLNCDRAFT_33552_R1/D2203116305_1_rna-CHLNCDRAFT_33552_R0/D2203116319_2_rna-gnl|jgi|COCSUDRAFT_…	13	molecular_function
GO:0005546	"phosphatidylinositol-4,5-bisphosphate binding"	0.0111065	0.031227	0.0196546	D2203116305_1_rna-CHLNCDRAFT_50911_R0/KAK2077153.1_GCA_031763795/CAK0761818.1_GCA_963575595	3	molecular_function
GO:0008124	4-alpha-hydroxytetrahydrobiopterin dehydratase activity	0.000907539	0.00400142	0.00251853	D2203116305_1_rna-CHLNCDRAFT_137157_R0/KAA6424436.1_GCA_008636185/KAK2077787.1_GCA_031763795/KAK2078189.1_GCA_031763795/CAK0784236.1_GCA_963575595/CAK0787906.1_GCA_963575595	6	molecular_function
GO:0003993	acid phosphatase activity	0.000164869	0.000940723	0.000592099	D2203116305_1_rna-CHLNCDRAFT_137433_R0/D2203116319_2_rna-gnl|jgi|COCSUDRAFT_mRNA65479_R0/D2203116319_2_rna-gnl|jgi|COCSUDRAFT_mRNA29324_R0/KAA6417269.1_GCA_008636185/KAA6420346.1_GCA_008636185/KAA6424535.1_GCA_008636185/KAK2076559.1_GCA_031763795/KAK2076560.1_GCA_031763795/KAK2076874.1_GCA_031763795/KAK2078817.1_GCA_031763795/CAK0782920.1_GCA_963575595/CAK0783558.1_GCA_963575595/CAK0785153.1_GCA_…	15	molecular_function
GO:0046556	alpha-L-arabinofuranosidase activity	8.36e-12	2.03e-10	1.28e-10	D2010028365_2_rna-gnl|jgi|COCSUDRAFT_mRNA56386_R1/D2010028365_2_rna-gnl|jgi|COCSUDRAFT_mRNA56386_R0/D2010028366_2_rna-gnl|jgi|COCSUDRAFT_mRNA56386_R1/D2010028366_2_rna-gnl|jgi|COCSUDRAFT_mRNA56386_R0/D2203116305_1_rna-CHLNCDRAFT_137674_R1/D2203116305_1_rna-CHLNCDRAFT_137674_R0/D2203116319_2_rna-gnl|jgi|COCSUDRAFT_mRNA56386_R1/KAA6420142.1_GCA_008636185/KAA6426821.1_GCA_008636185/KAK2080720.1_GCA_…	13	molecular_function
GO:0008519	ammonium transmembrane transporter activity	3.59e-09	6.34e-08	3.99e-08	D2203116305_1_rna-CHLNCDRAFT_141357_R0/D2203116305_1_rna-CHLNCDRAFT_56592_R0/D2203116305_1_rna-CHLNCDRAFT_136742_R0/D2203116319_2_rna-gnl|jgi|COCSUDRAFT_mRNA47532_R0/D2203116319_1_rna-CHLNCDRAFT_56592_R1/GCA_000143455.1_EFJ46377.1/GCA_000143455.1_EFJ48363.1/KAA6422825.1_GCA_008636185/KAA6424415.1_GCA_008636185/KAI7846332.1_GCA_025026875/KAK2078494.1_GCA_031763795/KAK2080248.1_GCA_031763795/CAK073…	16	molecular_function
GO:0015297	antiporter activity	0.00458264	0.0143392	0.00902524	D2203116305_1_rna-CHLNCDRAFT_19008_R0/D2203116305_1_rna-CHLNCDRAFT_133260_R0/D2203116305_1_rna-CHLNCDRAFT_58521_R0/D2203116305_1_rna-CHLNCDRAFT_142267_R0/D2203116319_2_rna-gnl|jgi|COCSUDRAFT_mRNA40375_R0/KAA6420288.1_GCA_008636185/KAA6421094.1_GCA_008636185/KAA6422715.1_GCA_008636185/KAI8106369.1_GCA_025209375/KAK2076612.1_GCA_031763795/KAK2077482.1_GCA_031763795/KAK2077483.1_GCA_031763795/KAK982…	14	molecular_function
GO:0042626	ATPase-coupled transmembrane transporter activity	0.000303864	0.00147374	0.000927585	D2203116305_3_rna-gnl|WGS_JADXDR|g3275.t1_R0/KAI8106339.1_GCA_025209375/KAK2076470.1_GCA_031763795/KAK9916362.1_GCA_040182555/CAL0296391.1_GCA_964019345	5	molecular_function
GO:0140664	ATP-dependent DNA damage sensor activity	0.00759183	0.0226587	0.0142616	D2203116305_1_rna-CHLNCDRAFT_58396_R0/KAA6419040.1_GCA_008636185/KAA6429283.1_GCA_008636185/KAK9825963.1_GCA_040144355/CAK0786082.1_GCA_963575595/CAK0782670.1_GCA_963575595/EFN56308.1_GCA_000147415/KAA6423047.1_GCA_008636185/CAK0780024.1_GCA_963575595/XP_005646763.1_GCF_000258705	10	molecular_function
GO:0005516	calmodulin binding	4.03e-06	3e-05	1.89e-05	D2203116305_1_rna-CHLNCDRAFT_137556_R0/D2203116305_1_rna-CHLNCDRAFT_58168_R0/D2203116319_2_rna-gnl|jgi|COCSUDRAFT_mRNA48200_R0/D2203116319_2_rna-gnl|jgi|COCSUDRAFT_mRNA45394_R0/KAA6424324.1_GCA_008636185/KAK2076441.1_GCA_031763795/KAK9907637.1_GCA_040182555/KAL0036630.1_GCA_040206755/CAK0731822.1_GCA_963575595/CAK0784171.1_GCA_963575595/CAK0787075.1_GCA_963575595	11	molecular_function
GO:0016830	carbon-carbon lyase activity	0.00523208	0.0158597	0.00998225	D2203116305_1_rna-CHLNCDRAFT_35292_R0/D2203116305_1_rna-CHLNCDRAFT_133312_R0/D2203116319_2_rna-gnl|jgi|COCSUDRAFT_mRNA38146_R0/D2203116319_2_rna-gnl|jgi|COCSUDRAFT_mRNA54732_R0/KAA6420333.1_GCA_008636185/KAA6420694.1_GCA_008636185/KAK2075986.1_GCA_031763795/CAK0787153.1_GCA_963575595/CAK0787685.1_GCA_963575595	9	molecular_function
GO:0015267	channel activity	2.87e-08	3.48e-07	2.19e-07	D2203116305_3_rna-gnl|WGS_JADXDR|g1159.t1_R0/D2203116319_2_rna-gnl|jgi|COCSUDRAFT_mRNA44755_R0/KAA6416698.1_GCA_008636185/KAA6417352.1_GCA_008636185/KAA6417646.1_GCA_008636185/KAA6417678.1_GCA_008636185/KAA6417698.1_GCA_008636185/KAA6418398.1_GCA_008636185/KAA6426741.1_GCA_008636185/KAA6429575.1_GCA_008636185/KAI3424863.1_GCA_023343905/KAL0053635.1_GCA_040206745/CAK0781615.1_GCA_963575595/CAK0782…	21	molecular_function
GO:0005254	chloride channel activity	2.1e-12	6.8e-11	4.28e-11	D2105061953_1_rna-CHLNCDRAFT_136634_R0/D2203116305_1_rna-CHLNCDRAFT_141619_R0/D2203116305_2_rna-gnl|WGS_LHPF|mrna.C2E20_2462_R0/D2203116305_1_rna-CHLNCDRAFT_143620_R2/D2203116305_1_rna-CHLNCDRAFT_137443_R0/D2203116305_3_rna-gnl|WGS_JADXDR|g8284.t1_R0/D2203116305_1_rna-CHLNCDRAFT_143620_R0/D2203116305_2_rna-gnl|WGS_LHPF|mrna.C2E20_1304_R0/D2203116305_3_rna-gnl|WGS_JADXDR|g7198.t1_R0/D2203116305_1_…	26	molecular_function
GO:0010277	chlorophyllide a oxygenase [overall] activity	5.27e-05	0.000319504	0.000201099	D2203116305_1_rna-CHLNCDRAFT_51738_R0/D2203116305_1_rna-CHLNCDRAFT_145588_R0/D2203116319_2_rna-gnl|jgi|COCSUDRAFT_mRNA39968_R0/D2203116319_2_rna-gnl|jgi|COCSUDRAFT_mRNA62940_R0/D2203116319_2_rna-gnl|jgi|COCSUDRAFT_mRNA47272_R0/D2203116319_2_rna-gnl|jgi|COCSUDRAFT_mRNA47549_R0/KAA6417833.1_GCA_008636185/KAA6419455.1_GCA_008636185/KAA6425884.1_GCA_008636185/CAK0757015.1_GCA_963575595/CAK0783635.1_G…	14	molecular_function
GO:0005507	copper ion binding	0.00154264	0.00598543	0.00376728	KAK9830963.1_GCA_040144335/D2203116305_1_rna-CHLNCDRAFT_58054_R1/D2203116305_2_rna-gnl|WGS_LHPF|mrna.C2E20_4454_R0/D2203116319_2_rna-gnl|jgi|COCSUDRAFT_mRNA28332_R0/D2203116319_2_rna-gnl|jgi|COCSUDRAFT_mRNA29142_R0/KAA6416614.1_GCA_008636185/KAA6418190.1_GCA_008636185/KAA6425374.1_GCA_008636185/KAA6429556.1_GCA_008636185/CAK0763276.1_GCA_963575595/CAK0784920.1_GCA_963575595/CAK0786627.1_GCA_96357…	15	molecular_function
GO:0003887	DNA-directed DNA polymerase activity	0.000343741	0.00162648	0.00102372	D2203116305_1_rna-CHLNCDRAFT_52598_R0/D2203116305_1_rna-CHLNCDRAFT_134899_R0/D2203116319_1_rna-CHLNCDRAFT_134898_R0/KAA6418852.1_GCA_008636185/KAA6421184.1_GCA_008636185/KAA6421197.1_GCA_008636185/KAI7839635.1_GCA_025026875/KAK2076801.1_GCA_031763795/KAK9826374.1_GCA_040144335/CAK0786882.1_GCA_963575595/CAK0786883.1_GCA_963575595	11	molecular_function
GO:0008199	ferric iron binding	0.000463557	0.00214119	0.00134768	D2203116305_3_rna-gnl|WGS_JADXDR|g8029.t1_R0/D2203116305_1_rna-CHLNCDRAFT_144557_R0/D2203116319_2_rna-gnl|jgi|COCSUDRAFT_mRNA25419_R0/D2203116319_2_rna-gnl|jgi|COCSUDRAFT_mRNA19440_R0/D2203116319_2_rna-gnl|jgi|COCSUDRAFT_mRNA67369_R0/EFN56349.1_GCA_000147415/KAK2076732.1_GCA_031763795/CAK0782518.1_GCA_963575595/CAK0785699.1_GCA_963575595/CAK0787259.1_GCA_963575595	10	molecular_function
GO:0016758	hexosyltransferase activity	0.0103959	0.0299642	0.0188597	D2203116305_1_rna-CHLNCDRAFT_140490_R0/D2203116319_2_rna-gnl|jgi|COCSUDRAFT_mRNA46961_R3/D2203116319_2_rna-gnl|jgi|COCSUDRAFT_mRNA62318_R0/KAA6418258.1_GCA_008636185/KAA6419757.1_GCA_008636185/KAA6424561.1_GCA_008636185/KAA6426439.1_GCA_008636185/CAK0731888.1_GCA_963575595/CAK0733417.1_GCA_963575595/CAK0774813.1_GCA_963575595/CAK0786136.1_GCA_963575595/CAK0786149.1_GCA_963575595/CAK0786504.1_GCA_…	17	molecular_function
GO:0004402	histone acetyltransferase activity	0.0105029	0.0299642	0.0188597	D2105061953_3_rna-gnl|WGS_JADXDR|g3263.t1_R0/D2203116305_3_rna-gnl|WGS_JADXDR|g3263.t1_R0/D2203116319_2_rna-gnl|jgi|COCSUDRAFT_mRNA23618_R0/KAA6428744.1_GCA_008636185/KAK2080334.1_GCA_031763795/CAK0783160.1_GCA_963575595	6	molecular_function
GO:0042393	histone binding	2.32e-07	2.37e-06	1.49e-06	D2203116305_1_rna-CHLNCDRAFT_56237_R0/D2203116319_2_rna-gnl|jgi|COCSUDRAFT_mRNA26537_R0/D2203116319_2_rna-gnl|jgi|COCSUDRAFT_mRNA33893_R0/KAA6420258.1_GCA_008636185/KAA6428862.1_GCA_008636185/KAK2077522.1_GCA_031763795/KAK2079964.1_GCA_031763795/KAK9867637.1_GCA_040144375/CAK0737550.1_GCA_963575595/CAK0764550.1_GCA_963575595	10	molecular_function
GO:0004069	L-aspartate:2-oxoglutarate aminotransferase activity	6.1e-06	4.38e-05	2.76e-05	D2203116305_1_rna-CHLNCDRAFT_144288_R0/D2203116319_2_rna-gnl|jgi|COCSUDRAFT_mRNA44586_R0/KAA6418005.1_GCA_008636185/KAA6423719.1_GCA_008636185/KAI8107263.1_GCA_025209345/KAK2077165.1_GCA_031763795/KAK2079374.1_GCA_031763795	7	molecular_function
GO:0004471	malate dehydrogenase (decarboxylating) (NAD+) activity	0.00023354	0.00125852	0.000792123	D2203116305_1_rna-CHLNCDRAFT_136414_R0/D2203116319_2_rna-gnl|jgi|COCSUDRAFT_mRNA54433_R0/KAA6417972.1_GCA_008636185/KAA6425723.1_GCA_008636185/KAA6428565.1_GCA_008636185/KAK2076138.1_GCA_031763795/KAK2079325.1_GCA_031763795/KAK9863752.1_GCA_040144375/CAK0782597.1_GCA_963575595/CAK0786805.1_GCA_963575595	10	molecular_function
GO:0005384	manganese ion transmembrane transporter activity	2.02e-06	1.57e-05	9.89e-06	D2203116305_3_rna-gnl|WGS_JADXDR|g8724.t1_R0/D2203116319_2_rna-gnl|jgi|COCSUDRAFT_mRNA60838_R0/D2203116319_2_rna-gnl|jgi|COCSUDRAFT_mRNA60838_R1/KAA6420929.1_GCA_008636185/KAA6426803.1_GCA_008636185/KAK2075655.1_GCA_031763795/KAL0036398.1_GCA_040206735/CAK0778924.1_GCA_963575595/CAK0782383.1_GCA_963575595	9	molecular_function
GO:0008569	minus-end-directed microtubule motor activity	6.82e-11	1.47e-09	9.26e-10	D2203116305_1_rna-CHLNCDRAFT_37234_R0/GCA_002284615.2_KAF5830263.1/RMZ56376.1_GCA_003709365/KAA6419077.1_GCA_008636185/KAA6419936.1_GCA_008636185/KAA6420380.1_GCA_008636185/KAA6420581.1_GCA_008636185/KAA6420695.1_GCA_008636185/KAA6421378.1_GCA_008636185/KAA6425804.1_GCA_008636185/KAA6425990.1_GCA_008636185/KAA6426289.1_GCA_008636185/KAA6427739.1_GCA_008636185/KAA6429049.1_GCA_008636185/KAK2077365…	19	molecular_function
GO:0008324	monoatomic cation transmembrane transporter activity	0.00145828	0.00577362	0.00363397	D2203116305_1_rna-CHLNCDRAFT_59655_R0/D2203116319_4_rna-gnl|WGS_JADXDR|g312.t1_R0/D2203116319_2_rna-gnl|jgi|COCSUDRAFT_mRNA21325_R0/EFN56390.1_GCA_000147415/KAA6420570.1_GCA_008636185/KAA6426536.1_GCA_008636185/KAI3426311.1_GCA_023343905/KAK9863937.1_GCA_040144375/CAK0740588.1_GCA_963575595/CAK0784774.1_GCA_963575595/CAL8463443.1_GCA_964261555	11	molecular_function
GO:0005216	monoatomic ion channel activity	4.6e-13	2.23e-11	1.4e-11	D2203116305_1_rna-CHLNCDRAFT_144091_R0/D2203116319_2_rna-gnl|jgi|COCSUDRAFT_mRNA67353_R1/D2203116319_2_rna-gnl|jgi|COCSUDRAFT_mRNA48935_R0/D2203116319_2_rna-gnl|jgi|COCSUDRAFT_mRNA67353_R0/KAA6417271.1_GCA_008636185/KAA6419227.1_GCA_008636185/KAL0022763.1_GCA_040206755/CAK0781779.1_GCA_963575595/CAK0781877.1_GCA_963575595/CAK0787224.1_GCA_963575595/CAL8463823.1_GCA_964261555/CAL8463824.1_GCA_9642…	31	molecular_function
GO:0070403	NAD+ binding	0.0019893	0.00721704	0.00454246	KAA6422017.1_GCA_008636185/CAK0786280.1_GCA_963575595/D2010028365_2_rna-gnl|jgi|COCSUDRAFT_mRNA37630_R0/D2010028366_2_rna-gnl|jgi|COCSUDRAFT_mRNA37630_R0/D2203116305_1_rna-CHLNCDRAFT_35480_R0/D2203116319_2_rna-gnl|jgi|COCSUDRAFT_mRNA37630_R0/KAA6428845.1_GCA_008636185/KAA6428999.1_GCA_008636185/KAK2078099.1_GCA_031763795/CAK0770867.1_GCA_963575595/CAK0787451.1_GCA_963575595	11	molecular_function
GO:0031491	nucleosome binding	0.0022838	0.00791172	0.00497971	D2203116319_2_rna-gnl|jgi|COCSUDRAFT_mRNA46779_R0/KAA6423305.1_GCA_008636185/KAK2078135.1_GCA_031763795/CAK0743308.1_GCA_963575595	4	molecular_function
GO:0035673	oligopeptide transmembrane transporter activity	1.44e-08	2.15e-07	1.36e-07	D2203116319_2_rna-gnl|jgi|COCSUDRAFT_mRNA65765_R0/KAA6422430.1_GCA_008636185/KAK9836320.1_GCA_040144335/KAK9836321.1_GCA_040144335/CAK0733471.1_GCA_963575595/CAK0753046.1_GCA_963575595/CAK0782357.1_GCA_963575595/D2203116319_2_rna-gnl|jgi|COCSUDRAFT_mRNA67643_R0/KAA6425640.1_GCA_008636185/CAK0783971.1_GCA_963575595/CAL8466363.1_GCA_964261555	11	molecular_function
GO:0033743	peptide-methionine (R)-S-oxide reductase activity	0.00111229	0.00469098	0.00295254	D2203116305_3_rna-gnl|WGS_JADXDR|g3380.t1_R0/D2203116305_3_rna-gnl|WGS_JADXDR|g3709.t1_R0/D2203116319_2_rna-gnl|jgi|COCSUDRAFT_mRNA21422_R0/KAA6420569.1_GCA_008636185/KAK9917463.1_GCA_040182555/CAK0739275.1_GCA_963575595/CAL8463493.1_GCA_964261555	7	molecular_function
GO:0004618	phosphoglycerate kinase activity	7.56e-05	0.000444396	0.000279707	D2203116305_1_rna-CHLNCDRAFT_48457_R0/D2203116319_2_rna-gnl|jgi|COCSUDRAFT_mRNA39868_R0/D2203116319_2_rna-gnl|jgi|COCSUDRAFT_mRNA17028_R0/KAA6419184.1_GCA_008636185/KAA6423087.1_GCA_008636185/KAK2075823.1_GCA_031763795/KAK2080568.1_GCA_031763795/CAK0785440.1_GCA_963575595	8	molecular_function
GO:0000155	phosphorelay sensor kinase activity	0.0177359	0.0477883	0.0300784	KAA6420686.1_GCA_008636185/BDA48630.1_GCA_020887355/KAK9807363.1_GCA_040144405/KAK9917634.1_GCA_040182555/CAK0739022.1_GCA_963575595/CAL8463505.1_GCA_964261555	6	molecular_function
GO:0015079	potassium ion transmembrane transporter activity	2.41e-18	2.34e-16	1.47e-16	D2203116305_1_rna-CHLNCDRAFT_55134_R0/D2203116319_2_rna-gnl|jgi|COCSUDRAFT_mRNA37582_R3/D2203116319_2_rna-gnl|jgi|COCSUDRAFT_mRNA29836_R1/D2203116319_2_rna-gnl|jgi|COCSUDRAFT_mRNA29836_R0/KAA6416413.1_GCA_008636185/KAA6416422.1_GCA_008636185/KAA6416641.1_GCA_008636185/KAA6420619.1_GCA_008636185/KAA6420674.1_GCA_008636185/KAA6426043.1_GCA_008636185/BDA42863.1_GCA_020887355/KAK9863712.1_GCA_0401443…	22	molecular_function
GO:0008131	primary amine oxidase activity	1.68e-08	2.17e-07	1.37e-07	KAK9830963.1_GCA_040144335/D2203116305_1_rna-CHLNCDRAFT_58054_R1/D2203116305_2_rna-gnl|WGS_LHPF|mrna.C2E20_4454_R0/D2203116319_2_rna-gnl|jgi|COCSUDRAFT_mRNA28332_R0/D2203116319_2_rna-gnl|jgi|COCSUDRAFT_mRNA29142_R0/KAA6416614.1_GCA_008636185/KAA6418190.1_GCA_008636185/KAA6425374.1_GCA_008636185/KAA6429556.1_GCA_008636185/CAK0763276.1_GCA_963575595/CAK0784920.1_GCA_963575595/CAK0786627.1_GCA_96357…	13	molecular_function
GO:0004674	protein serine/threonine kinase activity	0.00467204	0.0143869	0.00905526	D2203116305_3_rna-gnl|WGS_JADXDR|g7353.t1_R0/D2203116319_2_rna-gnl|jgi|COCSUDRAFT_mRNA83444_R0/KAL0019463.1_GCA_040206735/CAK0784756.1_GCA_963575595/KAK9863367.1_GCA_040144375/KAK9796300.1_GCA_040144405/CAL8463826.1_GCA_964261555/CAL8463827.1_GCA_964261555	8	molecular_function
GO:0044877	protein-containing complex binding	0.000187736	0.0010406	0.00065496	KAA6416894.1_GCA_008636185/KAI3435635.1_GCA_023343905/KAK2076505.1_GCA_031763795/CAK0787998.1_GCA_963575595/CAL8463248.1_GCA_964261555	5	molecular_function
GO:0048038	quinone binding	3.24e-08	3.55e-07	2.23e-07	KAK9830963.1_GCA_040144335/D2203116305_1_rna-CHLNCDRAFT_58054_R1/D2203116305_2_rna-gnl|WGS_LHPF|mrna.C2E20_4454_R0/D2203116319_2_rna-gnl|jgi|COCSUDRAFT_mRNA28332_R0/D2203116319_2_rna-gnl|jgi|COCSUDRAFT_mRNA29142_R0/KAA6416614.1_GCA_008636185/KAA6418190.1_GCA_008636185/KAA6425374.1_GCA_008636185/KAA6429556.1_GCA_008636185/CAK0763276.1_GCA_963575595/CAK0784920.1_GCA_963575595/CAK0786627.1_GCA_96357…	13	molecular_function
GO:0004185	serine-type carboxypeptidase activity	1.06e-06	9.34e-06	5.88e-06	D2105061953_2_rna-gnl|WGS_LHPF|mrna.C2E20_5635_R0/D2203116305_1_rna-CHLNCDRAFT_22188_R0/D2203116319_2_rna-gnl|jgi|COCSUDRAFT_mRNA15381_R0/KAA6416760.1_GCA_008636185/KAA6421849.1_GCA_008636185/KAA6430046.1_GCA_008636185/KAK2077956.1_GCA_031763795/KAK2080883.1_GCA_031763795/KAK9846351.1_GCA_040144335/KAK9824563.1_GCA_040144395/KAL0030639.1_GCA_040206735/CAK0787787.1_GCA_963575595/CAL8461633.1_GCA_9…	14	molecular_function
GO:0015116	sulfate transmembrane transporter activity	0.000263262	0.00134402	0.00084594	D2203116305_3_rna-gnl|WGS_JADXDR|g10697.t1_R0/D2203116305_2_rna-gnl|WGS_LHPF|mrna.C2E20_1005_R0/D2203116305_2_rna-gnl|WGS_LHPF|mrna.C2E20_7604_R0/D2203116319_2_rna-gnl|jgi|COCSUDRAFT_mRNA43213_R0/RMZ56343.1_GCA_003709365/KAA6425635.1_GCA_008636185/KAI3433639.1_GCA_023343905/KAK2077881.1_GCA_031763795/CAK0784376.1_GCA_963575595/CAK0785097.1_GCA_963575595	10	molecular_function
GO:0008146	sulfotransferase activity	0.00118802	0.00490374	0.00308646	KAI7846353.1_GCA_025026875/D2203116305_1_rna-CHLNCDRAFT_135761_R0/D2203116305_2_rna-gnl|WGS_LHPF|mrna.C2E20_7261_R0/D2203116319_3_rna-gnl|WGS_LHPF|mrna.C2E20_7261_R0/KAA6426812.1_GCA_008636185/CAK0736461.1_GCA_963575595/D2203116305_1_rna-CHLNCDRAFT_140783_R0/D2203116305_2_rna-gnl|WGS_LHPF|mrna.C2E20_2398_R0/D2203116305_1_rna-CHLNCDRAFT_139191_R0/PSC67763.1_GCA_002245815/KAI7843963.1_GCA_025026875…	13	molecular_function
GO:0015293	symporter activity	5.17e-05	0.000319504	0.000201099	D2203116319_2_rna-gnl|jgi|COCSUDRAFT_mRNA54529_R0/KAA6416516.1_GCA_008636185/KAA6428505.1_GCA_008636185/CAK0770956.1_GCA_963575595/CAK0785752.1_GCA_963575595/CAL8471163.1_GCA_964261555	6	molecular_function
GO:0003713	transcription coactivator activity	0.00200887	0.00721704	0.00454246	D2203116305_3_rna-gnl|WGS_JADXDR|g4078.t1_R0/KAA6415273.1_GCA_008636185/BDA50763.1_GCA_020887355/CAK0787296.1_GCA_963575595	4	molecular_function
GO:0008194	UDP-glycosyltransferase activity	3.27e-28	6.33e-26	3.99e-26	D2010028365_2_rna-gnl|jgi|COCSUDRAFT_mRNA67635_R0/D2010028366_2_rna-gnl|jgi|COCSUDRAFT_mRNA67635_R0/D2203116305_1_rna-CHLNCDRAFT_140490_R0/D2203116319_2_rna-gnl|jgi|COCSUDRAFT_mRNA46961_R3/D2203116319_2_rna-gnl|jgi|COCSUDRAFT_mRNA46052_R0/D2203116319_2_rna-gnl|jgi|COCSUDRAFT_mRNA65542_R0/D2203116319_2_rna-gnl|jgi|COCSUDRAFT_mRNA65542_R1/D2203116319_2_rna-gnl|jgi|COCSUDRAFT_mRNA62318_R0/D220311631…	39	molecular_function
GO:0005247	voltage-gated chloride channel activity	0.0133754	0.0365468	0.0230029	D2203116319_2_rna-gnl|jgi|COCSUDRAFT_mRNA12729_R0/D2203116319_2_rna-gnl|jgi|COCSUDRAFT_mRNA30425_R0/KAA6419216.1_GCA_008636185/KAA6429120.1_GCA_008636185/KAK9808763.1_GCA_040144395/KAL0038636.1_GCA_040206755/CAK0770655.1_GCA_963575595/CAK0779478.1_GCA_963575595/CAK0785644.1_GCA_963575595	9	molecular_function
GO:0042910	xenobiotic transmembrane transporter activity	0.00458264	0.0143392	0.00902524	D2203116305_1_rna-CHLNCDRAFT_19008_R0/D2203116305_1_rna-CHLNCDRAFT_133260_R0/D2203116305_1_rna-CHLNCDRAFT_58521_R0/D2203116305_1_rna-CHLNCDRAFT_142267_R0/D2203116319_2_rna-gnl|jgi|COCSUDRAFT_mRNA40375_R0/KAA6420288.1_GCA_008636185/KAA6421094.1_GCA_008636185/KAA6422715.1_GCA_008636185/KAI8106369.1_GCA_025209375/KAK2076612.1_GCA_031763795/KAK2077482.1_GCA_031763795/KAK2077483.1_GCA_031763795/KAK982…	14	molecular_function

## Sheet: Supplementary table5
ID	Lnl1	Lnl2	LRT	P_value	P_adjust				ID	Description	GeneRatio	BgRatio	pvalue	p.adjust	qvalue	geneID	Count
OG0000392	-8927.02	-8934.93	15.8241	6.9511e-05	0.00595188				GO:0015833	peptide transport	54/280	54/130027	4.14e-147	3.11e-146	1.96e-146	D2010028353_1_rna-CHLNCDRAFT_143667_R0/D2010028365_2_rna-gnl|jgi|COCSUDRAFT_mRNA27109_R0/D2010028365_4_rna-gnl|WGS_JADXDR|g3090.t1_R0/D2010028366_2_rna-gnl|jgi|COCSUDRAFT_mRNA27109_R0/D2010028366_4_rna-gnl|WGS_JADXDR|g3090.t1_R0/D2105061953_1_rna-CHLNCDRAFT_143667_R0/D2203116305_1_rna-CHLNCDRAFT_143667_R0/D2203116305_3_rna-gnl|WGS_JADXDR|g3090.t1_R0/D2203116319_2_rna-gnl|jgi|COCSUDRAFT_mRNA27109_…	54
OG0000192	-7540.3	-7557.33	34.069	5e-09	8.5625e-07				GO:1904680	peptide transmembrane transporter activity	54/280	54/130027	4.14e-147	3.11e-146	1.96e-146	D2010028353_1_rna-CHLNCDRAFT_143667_R0/D2010028365_2_rna-gnl|jgi|COCSUDRAFT_mRNA27109_R0/D2010028365_4_rna-gnl|WGS_JADXDR|g3090.t1_R0/D2010028366_2_rna-gnl|jgi|COCSUDRAFT_mRNA27109_R0/D2010028366_4_rna-gnl|WGS_JADXDR|g3090.t1_R0/D2105061953_1_rna-CHLNCDRAFT_143667_R0/D2203116305_1_rna-CHLNCDRAFT_143667_R0/D2203116305_3_rna-gnl|WGS_JADXDR|g3090.t1_R0/D2203116319_2_rna-gnl|jgi|COCSUDRAFT_mRNA27109_…	54
OG0000240	-6383.48	-6426.89	86.8204	0	0				GO:0004176	ATP-dependent peptidase activity	58/280	331/130027	6.91e-93	3.46e-92	2.18e-92	D2010028353_3_rna-gnl|WGS_JADXDR|g4439.t1_R0/D2010028365_2_rna-gnl|jgi|COCSUDRAFT_mRNA16265_R0/D2010028365_2_rna-gnl|jgi|COCSUDRAFT_mRNA52790_R0/D2010028366_2_rna-gnl|jgi|COCSUDRAFT_mRNA52790_R0/D2010028366_2_rna-gnl|jgi|COCSUDRAFT_mRNA16265_R0/D2105061953_1_rna-CHLNCDRAFT_142278_R0/D2105061953_3_rna-gnl|WGS_JADXDR|g4439.t1_R0/D2203116305_3_rna-gnl|WGS_JADXDR|g4439.t1_R0/D2203116319_2_rna-gnl|jgi…	58
OG0000504	-6193.11	-6171.25	43.7204	0	0				GO:0009378	four-way junction helicase activity	19/280	460/130027	1.09e-18	4.08e-18	2.58e-18	D2010028365_2_rna-gnl|jgi|COCSUDRAFT_mRNA52790_R0/D2010028366_2_rna-gnl|jgi|COCSUDRAFT_mRNA52790_R0/D2105061953_1_rna-CHLNCDRAFT_142278_R0/D2203116319_2_rna-gnl|jgi|COCSUDRAFT_mRNA52790_R0/EFN58294.1_GCA_000147415/KDD72640.1_GCA_000690575/PSC71547.1_GCA_002245815/BDA41445.1_GCA_020887355/KAI3428267.1_GCA_023343905/KAI7839312.1_GCA_025026875/KAI8105762.1_GCA_025209345/KAI8106379.1_GCA_025209375/KA…	19
OG0000388	-5274.26	-5258.6	31.3273	2.2e-08	2.51167e-06				GO:0016829	lyase activity	13/280	255/130027	2.31e-14	6.92e-14	4.37e-14	D2010028353_1_rna-CHLNCDRAFT_56614_R0/D2203116305_1_rna-CHLNCDRAFT_56614_R0/EFN60155.1_GCA_000147415/PSC69541.1_GCA_002245815/BDA42673.1_GCA_020887355/KAI3429823.1_GCA_023343905/KAI7844416.1_GCA_025026875/KAI8107044.1_GCA_025209345/KAI8110406.1_GCA_025209375/KAK2077086.1_GCA_031763795/WPT14751.1_GCA_034226945/CAK0764152.1_GCA_963575595/CAL0288787.1_GCA_964019345	13
OG0000620	-4703.67	-4687.54	32.2597	1.3e-08	1.781e-06				GO:0006520	amino acid metabolic process	13/280	360/130027	1.83e-12	4.58e-12	2.89e-12	D2010028353_1_rna-CHLNCDRAFT_56614_R0/D2203116305_1_rna-CHLNCDRAFT_56614_R0/EFN60155.1_GCA_000147415/PSC69541.1_GCA_002245815/BDA42673.1_GCA_020887355/KAI3429823.1_GCA_023343905/KAI7844416.1_GCA_025026875/KAI8107044.1_GCA_025209345/KAI8110406.1_GCA_025209375/KAK2077086.1_GCA_031763795/WPT14751.1_GCA_034226945/CAK0764152.1_GCA_963575595/CAL0288787.1_GCA_964019345	13
OG0000437	-3177.79	-3199.02	42.4646	0	0				GO enrichment analysis of the 9 orthogroups
OG0000678	-2681.71	-2693.79	24.1557	8.89e-07	8.6995e-05
OG0000550	-2056.31	-2048.81	15.0078	0.000107068	0.00814906
9 orthogroups may possibly under positive selection and rapid evolution

## Sheet: Supplementary table6
ID	Lnl1	Lnl2	LRT	P_value	P_adjust							ID	Description	GeneRatio	BgRatio	pvalue	p.adjust	qvalue	geneID	Count
OG0000392	-8949.04	-8927.02	44.0296	0	0							GO:0015833	peptide transport	54/437	54/130027	8.89e-136	7.11e-135	4.68e-135	D2010028353_1_rna-CHLNCDRAFT_143667_R0/D2010028365_2_rna-gnl|jgi|COCSUDRAFT_mRNA27109_R0/D2010028365_4_rna-gnl|WGS_JADXDR|g3090.t1_R0/D2010028366_2_rna-gnl|jgi|COCSUDRAFT_mRNA27109_R0/D2010028366_4_rna-gnl|WGS_JADXDR|g3090.t1_R0/D2105061953_1_rna-CHLNCDRAFT_143667_R0/D2203116305_1_rna-CHLNCDRAFT_143667_R0/D2203116305_3_rna-gnl|WGS_JADXDR|g3090.t1_R0/D2203116319_2_rna-gnl|jgi|COCSUDRAFT_mRNA27109_…	54
OG0000502	-4903.63	-4842.25	122.758	0	0							GO:1904680	peptide transmembrane transporter activity	54/437	54/130027	8.89e-136	7.11e-135	4.68e-135	D2010028353_1_rna-CHLNCDRAFT_143667_R0/D2010028365_2_rna-gnl|jgi|COCSUDRAFT_mRNA27109_R0/D2010028365_4_rna-gnl|WGS_JADXDR|g3090.t1_R0/D2010028366_2_rna-gnl|jgi|COCSUDRAFT_mRNA27109_R0/D2010028366_4_rna-gnl|WGS_JADXDR|g3090.t1_R0/D2105061953_1_rna-CHLNCDRAFT_143667_R0/D2203116305_1_rna-CHLNCDRAFT_143667_R0/D2203116305_3_rna-gnl|WGS_JADXDR|g3090.t1_R0/D2203116319_2_rna-gnl|jgi|COCSUDRAFT_mRNA27109_…	54
OG0000514	-3752.96	-3774.88	43.8328	0	0							GO:0004571	"mannosyl-oligosaccharide 1,2-alpha-mannosidase activity"	67/437	150/130027	2.88e-125	1.53e-124	1.01e-124	D2010028353_3_rna-gnl|WGS_JADXDR|g10832.t1_R0/D2010028365_2_rna-gnl|jgi|COCSUDRAFT_mRNA37668_R0/D2010028365_2_rna-gnl|jgi|COCSUDRAFT_mRNA28682_R0/D2010028365_2_rna-gnl|jgi|COCSUDRAFT_mRNA37668_R2/D2010028366_2_rna-gnl|jgi|COCSUDRAFT_mRNA28682_R0/D2010028366_2_rna-gnl|jgi|COCSUDRAFT_mRNA37668_R2/D2010028366_2_rna-gnl|jgi|COCSUDRAFT_mRNA37668_R0/D2105061953_3_rna-gnl|WGS_JADXDR|g10832.t1_R0/D220311…	67
OG0000394	-3648.62	-3664.04	30.8433	2.8e-08	3.836e-06							GO:0004471	malate dehydrogenase (decarboxylating) (NAD+) activity	54/437	125/130027	6.94e-100	2.78e-99	1.83e-99	D2010028353_1_rna-CHLNCDRAFT_35453_R0/D2010028365_1_rna-CHLNCDRAFT_35453_R0/D2010028365_2_rna-gnl|jgi|COCSUDRAFT_mRNA54433_R0/D2010028366_1_rna-CHLNCDRAFT_35453_R0/D2010028366_2_rna-gnl|jgi|COCSUDRAFT_mRNA54433_R0/D2105061953_1_rna-CHLNCDRAFT_35453_R0/D2203116305_1_rna-CHLNCDRAFT_136414_R0/D2203116319_2_rna-gnl|jgi|COCSUDRAFT_mRNA54433_R0/EFN53662.1_GCA_000147415/EFN55561.1_GCA_000147415/KDD76796…	54
OG0000938	-3468.8	-3459.2	19.2089	1.1717e-05	0.00100327							GO:0004176	ATP-dependent peptidase activity	58/437	331/130027	8.93e-81	2.86e-80	1.88e-80	D2010028353_3_rna-gnl|WGS_JADXDR|g4439.t1_R0/D2010028365_2_rna-gnl|jgi|COCSUDRAFT_mRNA16265_R0/D2010028365_2_rna-gnl|jgi|COCSUDRAFT_mRNA52790_R0/D2010028366_2_rna-gnl|jgi|COCSUDRAFT_mRNA52790_R0/D2010028366_2_rna-gnl|jgi|COCSUDRAFT_mRNA16265_R0/D2105061953_1_rna-CHLNCDRAFT_142278_R0/D2105061953_3_rna-gnl|WGS_JADXDR|g4439.t1_R0/D2203116305_3_rna-gnl|WGS_JADXDR|g4439.t1_R0/D2203116319_2_rna-gnl|jgi…	58
OG0000437	-3177.79	-3194.39	33.1871	8e-09	1.37e-06							GO:0009378	four-way junction helicase activity	19/437	460/130027	3.88e-15	1.03e-14	6.8e-15	D2010028365_2_rna-gnl|jgi|COCSUDRAFT_mRNA52790_R0/D2010028366_2_rna-gnl|jgi|COCSUDRAFT_mRNA52790_R0/D2105061953_1_rna-CHLNCDRAFT_142278_R0/D2203116319_2_rna-gnl|jgi|COCSUDRAFT_mRNA52790_R0/EFN58294.1_GCA_000147415/KDD72640.1_GCA_000690575/PSC71547.1_GCA_002245815/BDA41445.1_GCA_020887355/KAI3428267.1_GCA_023343905/KAI7839312.1_GCA_025026875/KAI8105762.1_GCA_025209345/KAI8106379.1_GCA_025209375/KA…	19
OG0000794	-1997.07	-1990.58	12.9735	0.000315927	0.0196736							GO enrichment analysis of the 11 orthogroups
OG0000041	-1842.71	-1835.25	14.9172	0.000112337	0.00855009
OG0000253	-1501.31	-1512.36	22.0985	2.59e-06	0.00025345
OG0000382	-1283.97	-1276.92	14.1054	0.000172849	0.0118402
OG0000166	-1135.33	-1148.92	27.1678	1.87e-07	2.13492e-05
11 orthogroups may possibly under positive selection and rapid evolution

## Sheet: Supplementary table7
ID	Lnl1	Lnl2	LRT	P_value	P_adjust			ID	Description	pvalue	p.adjust	qvalue	geneID	Count
OG0000392	-8927.02	-8949.04	44.0296	0	0			GO:0005254	chloride channel activity	3.9e-252	1.25e-250	8.21e-251	D2010028353_1_rna-CHLNCDRAFT_141619_R2/D2010028353_2_rna-gnl|WGS_LHPF|mrna.C2E20_1304_R0/D2010028353_1_rna-CHLNCDRAFT_143620_R0/D2010028353_3_rna-gnl|WGS_JADXDR|g7198.t1_R0/D2010028353_1_rna-CHLNCDRAFT_137443_R0/D2010028353_1_rna-CHLNCDRAFT_144992_R0/D2010028353_1_rna-CHLNCDRAFT_58489_R1/D2010028365_2_rna-gnl|jgi|COCSUDRAFT_mRNA31392_R0/D2010028365_2_rna-gnl|jgi|COCSUDRAFT_mRNA65347_R0/D201002836…	142
OG0000192	-7557.33	-7540.3	34.069	5e-09	5.70833e-07			GO:0008964	phosphoenolpyruvate carboxylase activity	9.02e-109	1.44e-107	9.49e-108	D2010028353_1_rna-CHLNCDRAFT_37051_R0/D2010028365_1_rna-CHLNCDRAFT_58769_R0/D2010028366_1_rna-CHLNCDRAFT_58769_R0/D2105061953_1_rna-CHLNCDRAFT_37051_R0/D2203116305_1_rna-CHLNCDRAFT_37051_R0/D2203116319_2_rna-gnl|jgi|COCSUDRAFT_mRNA52173_R0/EFN52185.1_GCA_000147415/EFN52804.1_GCA_000147415/KDD75970.1_GCA_000690575/PSC70593.1_GCA_002245815/PSC73260.1_GCA_002245815/RMZ53293.1_GCA_003709365/KAA642180…	49
OG0000626	-7420.35	-7404.63	31.4399	2.1e-08	1.88375e-06			GO:0004571	"mannosyl-oligosaccharide 1,2-alpha-mannosidase activity"	2.12e-105	2.26e-104	1.49e-104	D2010028353_3_rna-gnl|WGS_JADXDR|g10832.t1_R0/D2010028365_2_rna-gnl|jgi|COCSUDRAFT_mRNA37668_R0/D2010028365_2_rna-gnl|jgi|COCSUDRAFT_mRNA28682_R0/D2010028365_2_rna-gnl|jgi|COCSUDRAFT_mRNA37668_R2/D2010028366_2_rna-gnl|jgi|COCSUDRAFT_mRNA28682_R0/D2010028366_2_rna-gnl|jgi|COCSUDRAFT_mRNA37668_R2/D2010028366_2_rna-gnl|jgi|COCSUDRAFT_mRNA37668_R0/D2105061953_3_rna-gnl|WGS_JADXDR|g10832.t1_R0/D220311…	67
OG0000416	-6709.53	-6753.23	87.416	0	0			GO:0015977	carbon fixation	1.96e-104	1.57e-103	1.03e-103	D2010028353_1_rna-CHLNCDRAFT_37051_R0/D2010028365_1_rna-CHLNCDRAFT_58769_R0/D2010028366_1_rna-CHLNCDRAFT_58769_R0/D2105061953_1_rna-CHLNCDRAFT_37051_R0/D2203116305_1_rna-CHLNCDRAFT_37051_R0/D2203116319_2_rna-gnl|jgi|COCSUDRAFT_mRNA52173_R0/EFN52185.1_GCA_000147415/EFN52804.1_GCA_000147415/KDD75970.1_GCA_000690575/PSC70593.1_GCA_002245815/PSC73260.1_GCA_002245815/RMZ53293.1_GCA_003709365/KAA642180…	49
OG0000240	-6383.48	-6397.57	28.1666	1.11e-07	7.6035e-06			GO:0006099	tricarboxylic acid cycle	2.7e-86	1.73e-85	1.14e-85	D2010028353_1_rna-CHLNCDRAFT_37051_R0/D2010028365_1_rna-CHLNCDRAFT_58769_R0/D2010028366_1_rna-CHLNCDRAFT_58769_R0/D2105061953_1_rna-CHLNCDRAFT_37051_R0/D2203116305_1_rna-CHLNCDRAFT_37051_R0/D2203116319_2_rna-gnl|jgi|COCSUDRAFT_mRNA52173_R0/EFN52185.1_GCA_000147415/EFN52804.1_GCA_000147415/KDD75970.1_GCA_000690575/PSC70593.1_GCA_002245815/PSC73260.1_GCA_002245815/RMZ53293.1_GCA_003709365/KAA642180…	49
OG0000388	-5258.6	-5274.26	31.3273	2.2e-08	1.88375e-06			GO:0004471	malate dehydrogenase (decarboxylating) (NAD+) activity	4.54e-84	2.42e-83	1.59e-83	D2010028353_1_rna-CHLNCDRAFT_35453_R0/D2010028365_1_rna-CHLNCDRAFT_35453_R0/D2010028365_2_rna-gnl|jgi|COCSUDRAFT_mRNA54433_R0/D2010028366_1_rna-CHLNCDRAFT_35453_R0/D2010028366_2_rna-gnl|jgi|COCSUDRAFT_mRNA54433_R0/D2105061953_1_rna-CHLNCDRAFT_35453_R0/D2203116305_1_rna-CHLNCDRAFT_136414_R0/D2203116319_2_rna-gnl|jgi|COCSUDRAFT_mRNA54433_R0/EFN53662.1_GCA_000147415/EFN55561.1_GCA_000147415/KDD76796…	54
OG0000502	-4842.25	-4836.25	12.0082	0.000529658	0.0201564			GO:0016779	nucleotidyltransferase activity	1.44e-65	6.56e-65	4.32e-65	D2010028353_1_rna-CHLNCDRAFT_56519_R0/D2010028365_2_rna-gnl|jgi|COCSUDRAFT_mRNA28274_R0/D2010028365_4_rna-gnl|WGS_JADXDR|g3717.t1_R0/D2010028366_4_rna-gnl|WGS_JADXDR|g3717.t1_R0/D2010028366_2_rna-gnl|jgi|COCSUDRAFT_mRNA28274_R0/D2105061953_1_rna-CHLNCDRAFT_37654_R0/D2203116305_3_rna-gnl|WGS_JADXDR|g3717.t1_R0/D2203116319_2_rna-gnl|jgi|COCSUDRAFT_mRNA28274_R0/D2203116319_2_rna-gnl|jgi|COCSUDRAFT_m…	62
OG0000514	-3752.96	-3774.88	43.8328	0	0			GO:0004176	ATP-dependent peptidase activity	5.52e-64	2.21e-63	1.45e-63	D2010028353_3_rna-gnl|WGS_JADXDR|g4439.t1_R0/D2010028365_2_rna-gnl|jgi|COCSUDRAFT_mRNA16265_R0/D2010028365_2_rna-gnl|jgi|COCSUDRAFT_mRNA52790_R0/D2010028366_2_rna-gnl|jgi|COCSUDRAFT_mRNA52790_R0/D2010028366_2_rna-gnl|jgi|COCSUDRAFT_mRNA16265_R0/D2105061953_1_rna-CHLNCDRAFT_142278_R0/D2105061953_3_rna-gnl|WGS_JADXDR|g4439.t1_R0/D2203116305_3_rna-gnl|WGS_JADXDR|g4439.t1_R0/D2203116319_2_rna-gnl|jgi…	58
OG0000394	-3664.04	-3648.62	30.8433	2.8e-08	2.13111e-06			GO:0009378	four-way junction helicase activity	2.86e-10	1.02e-09	6.7e-10	D2010028365_2_rna-gnl|jgi|COCSUDRAFT_mRNA52790_R0/D2010028366_2_rna-gnl|jgi|COCSUDRAFT_mRNA52790_R0/D2105061953_1_rna-CHLNCDRAFT_142278_R0/D2203116319_2_rna-gnl|jgi|COCSUDRAFT_mRNA52790_R0/EFN58294.1_GCA_000147415/KDD72640.1_GCA_000690575/PSC71547.1_GCA_002245815/BDA41445.1_GCA_020887355/KAI3428267.1_GCA_023343905/KAI7839312.1_GCA_025026875/KAI8105762.1_GCA_025209345/KAI8106379.1_GCA_025209375/KA…	19
OG0000938	-3468.8	-3459.2	19.2089	1.1717e-05	0.000535076			GO:0016829	lyase activity	1.58e-08	5.04e-08	3.32e-08	D2010028353_1_rna-CHLNCDRAFT_56614_R0/D2203116305_1_rna-CHLNCDRAFT_56614_R0/EFN60155.1_GCA_000147415/PSC69541.1_GCA_002245815/BDA42673.1_GCA_020887355/KAI3429823.1_GCA_023343905/KAI7844416.1_GCA_025026875/KAI8107044.1_GCA_025209345/KAI8110406.1_GCA_025209375/KAK2077086.1_GCA_031763795/WPT14751.1_GCA_034226945/CAK0764152.1_GCA_963575595/CAL0288787.1_GCA_964019345	13
OG0000325	-1778.08	-1739.48	77.1941	0	0			GO:0006520	amino acid metabolic process	8.28e-07	2.41e-06	1.58e-06	D2010028353_1_rna-CHLNCDRAFT_56614_R0/D2203116305_1_rna-CHLNCDRAFT_56614_R0/EFN60155.1_GCA_000147415/PSC69541.1_GCA_002245815/BDA42673.1_GCA_020887355/KAI3429823.1_GCA_023343905/KAI7844416.1_GCA_025026875/KAI8107044.1_GCA_025209345/KAI8110406.1_GCA_025209375/KAK2077086.1_GCA_031763795/WPT14751.1_GCA_034226945/CAK0764152.1_GCA_963575595/CAL0288787.1_GCA_964019345	13
OG0000253	-1501.31	-1512.36	22.0985	2.59e-06	0.000136473			GO:0090730	Las1 complex	0.00113912	0.00303767	0.00199846	PSC75177.1_GCA_002245815/PSC75178.1_GCA_002245815/PSC75179.1_GCA_002245815	3
OG0000362	-1456.39	-1474.15	35.5049	3e-09	4.11e-07			GO enrichment analysis of the 18 orthogroups
OG0000674	-1365.91	-1352.18	27.4476	1.61e-07	1.00259e-05
OG0000033	-1293.36	-1282.25	22.2224	2.428e-06	0.000136473
OG0000166	-1144.96	-1135.33	19.2408	1.1522e-05	0.000535076
OG0000308	-1081.16	-1087.29	12.2558	0.000463805	0.0186886
OG0000213	-367.439	-359.543	15.7905	7.0758e-05	0.00302933
18 orthogroups may possibly under positive selection and rapid evolution

## Sheet: Supplementary table8
		Transporter					Assimilation									Urea Cycle
		nitrate transporter	nitrite transporter	ammonium transporter	urea active transporter	amino acid transporter	nitrate reductase	nitrite reductase	urease	urease accessory protein UREG	urease accessory protein D	glutamine synthetase	glutamate synthase	glutamate dehydrogenase	nitrogen regulatory protein PII	carbamoyl phosphate synthase,	ornithine carbamoyltransferase	argininosuccinate synthase	argininosuccinate lyase	arginase
Chlorella ohadii	GCA_025026875	2	6	3	1	14	18	2	0	1	0	2	10	5	1	5	2	2	2	2
Chlorella pyrenoidosa	SAMC4847386	1	1	4	0	10	8	2	0	0	0	1	3	2	1	2	2	0	2	0
Chlorella variabilis	GCA_000147415	2	3	5	1	16	6	2	0	0	1	2	7	4	1	4	2	1	3	0
Chlorella vulgaris	SAMC4847387	1	1	3	1	9	8	1	0	0	0	1	4	2	1	2	2	0	2	0
Chlorella vulgaris	SAMC4847388	1	1	3	0	8	7	2	0	0	0	1	4	1	0	2	2	0	2	0
Chlorella vulgaris	GCA_023343905	1	1	4	1	11	10	3	0	0	0	3	7	2	1	4	2	1	2	0
Micractinium conductrix	GCA_002245815	1	8	6	1	14	11	3	0	0	0	3	10	6	1	7	2	1	3	0
Helicosporidium sp. ATCC 50920	GCA_000690575	0	0	1	0	3	6	1	0	0	0	1	3	1	1	4	3	2	2	0
Prototheca wickerhamii	GCA_031763795	0	1	2	0	8	6	1	0	0	0	1	4	2	1	3	3	1	2	0
Auxenochlorella protothecoides	GCA_003709365	0	1	2	0	7	5	1	0	0	0	1	6	2	1	3	2	1	2	0
Apatococcus fuscideae	GCA_040144375	0	2	4	5	8	11	3	0	0	0	1	4	2	1	4	1	1	3	0
Apatococcus lobatus	GCA_040144355	1	4	2	2	7	12	2	0	0	0	4	4	1	1	4	2	1	2	0
Picochlorum sp. BPE23	GCA_025209345	1	1	1	1	5	12	2	0	0	0	2	8	3	1	7	2	2	2	0
Picochlorum sp. BPE23	GCA_025209375	1	1	1	1	6	10	2	0	0	0	2	8	3	1	7	2	2	2	0
Picochlorum sp. SENEW3	GCA_034226945	2	1	1	1	5	10	2	0	0	0	2	8	3	1	6	2	1	2	0
Elliptochloris bilobata	GCA_040144335	2	4	2	3	3	16	2	0	0	0	5	7	3	1	4	2	1	2	0
Coccomyxa arvernensis	SAMC4847389	0	2	2	6	1	11	2	0	0	0	3	4	3	1	4	1	0	2	0
Coccomyxa elongata	GCA_964261555	1	2	2	7	3	13	2	0	0	0	5	7	3	1	6	2	1	3	0
Coccomyxa rayssiae	SAMC4847390	0	1	2	4	3	11	2	0	0	0	3	5	3	0	2	2	1	2	0
Coccomyxa simplex	SAMC4847391	1	2	2	6	1	11	2	0	0	0	4	4	3	1	4	1	0	2	0
Coccomyxa sp. Obi	GCA_020887355	1	2	2	6	4	13	2	0	0	0	5	7	4	1	6	2	1	2	0
Coccomyxa subellipsoidea	GCA_040182555	1	3	2	6	3	10	2	0	0	0	5	6	4	1	6	2	1	2	0
Coccomyxa subellipsoidea C-169	GCF_000258705	1	2	2	6	2	13	2	0	0	0	5	8	3	0	6	2	1	2	0
Coccomyxa viridis	GCA_963575595	1	4	3	9	5	15	2	1	0	0	3	8	4	1	6	2	1	2	0
Coccomyxa viridis	GCA_964019345	1	3	3	8	4	15	2	1	0	0	3	8	3	1	5	2	1	2	0
Myrmecia bisecta	GCA_040144395	2	3	8	3	5	11	2	0	0	0	4	12	3	1	7	2	1	2	0
Symbiochloris irregularis	GCA_040144405	1	4	3	7	3	7	2	0	0	0	5	6	3	1	5	2	1	2	0
Trebouxia sp. A1-2	GCA_008636185	1	3	2	1	1	9	4	0	0	0	1	8	3	0	5	2	1	2	0
Trebouxia sp. C0004	GCA_040206735	2	2	2	3	1	12	6	0	0	0	2	8	3	1	4	2	1	3	0
Trebouxia sp. C0005	GCA_040206755	2	3	2	3	1	12	2	0	0	0	1	7	3	1	5	2	1	2	0
Trebouxia sp. C0006	GCA_040206745	2	3	2	7	1	13	2	0	0	0	2	7	4	1	4	2	1	2	0

## Sheet: Supplementary table9
		HUP1	HUP2	HUP3
GCA_025026875	Chlorella ohadii	7	7	3
SAMC4847386	Chlorella pyrenoidosa	4	1	5
GCA_000147415	Chlorella variabilis	5	2	7
SAMC4847387	Chlorella vulgaris	4	1	5
SAMC4847388	Chlorella vulgaris	3	1	5
GCA_023343905	Chlorella vulgaris	4	1	5
GCA_003709365	Auxenochlorella protothecoides	4	2	5
GCA_000690575	Helicosporidium sp. ATCC 50920	2	1	2
GCA_031763795	Prototheca wickerhamii	5	0	2
GCA_002245815	Micractinium conductrix	9	7	4
GCA_025209345	Picochlorum sp. BPE23	4	0	3
GCA_025209375	Picochlorum sp. BPE23	4	0	3
GCA_034226945	Picochlorum sp. SENEW3	4	0	3
GCA_040144375	Apatococcus fuscideae	8	4	7
GCA_040144355	Apatococcus lobatus	9	4	6
GCA_040144335	Elliptochloris bilobata	6	3	5
SAMC4847389	Coccomyxa arvernensis	8	8	3
GCA_964261555	Coccomyxa elongata	8	12	4
SAMC4847390	Coccomyxa rayssiae	6	8	3
SAMC4847391	Coccomyxa simplex	9	8	3
GCA_020887355	Coccomyxa sp. Obi	9	11	4
GCA_040182555	Coccomyxa subellipsoidea	9	10	5
GCF_000258705	Coccomyxa subellipsoidea C-169	4	11	7
GCA_963575595	Coccomyxa viridis	8	8	5
GCA_964019345	Coccomyxa viridis	6	9	6
GCA_040144395	Myrmecia bisecta	4	2	6
GCA_040144405	Symbiochloris irregularis	8	6	5
GCA_008636185	Trebouxia sp. A1-2	9	2	1
GCA_040206735	Trebouxia sp. C0004	10	6	1
GCA_040206755	Trebouxia sp. C0005	13	2	3
GCA_040206745	Trebouxia sp. C0006	11	6	3

## Sheet: Supplementary table10
Species	C4 pathway	NADP-ME				NAD-ME						PCK
		4.1.1.31	2.7.9.1	1.1.1.82	1.1.1.40	4.1.1.31	2.7.9.1	2.6.1.1	1.1.1.37	1.1.1.39	2.6.1.2	4.1.1.31	2.7.9.1	2.6.1.1	4.1.1.49	2.7.1.40	2.6.1.2
		PEPC phosphoenolpyruvate carboxylase	PPDK	malate dehydrogenase (NADP+)	malic enzyme	PEPC phosphoenolpyruvate carboxylase	PPDK	aspartate transaminase	malate dehydrogenase	malate dehydrogenase (decarboxylating) (NAD+)	alanine transaminase	PEPC phosphoenolpyruvate carboxylase	PPDK	aspartate transaminase	PCK phosphoenolpyruvate carboxykinase (ATP)	pyruvate kinase	alanine transaminase
Chlorella pyrenoidosa	SAMC4847386	+	+	+	+	+	+	+	+	+	+	+	+	+	+	+	+
Chlorella vulgaris	SAMC4847387	+	+	+	+	+	+	+	+	+	+	+	+	+	+	+	+
Chlorella vulgaris	SAMC4847388	+			+	+		+	+	+	+	+		+	+	+	+
Chlorella variabilis	GCA_000147415.1	+	+			+	+	+		+	+	+	+	+	+	+	+
Chlorella vulgaris	GCA_023343905.1	+	+			+	+	+		+	+	+	+	+	+	+	+
Chlorella ohadii	GCA_025026875.1	+	+			+	+	+		+	+	+	+	+	+	+	+
Apatococcus lobatus	GCA_040144355.1	+				+		+		+	+	+		+	+	+	+
Apatococcus fuscideae	GCA_040144375.1	+				+		+		+	+	+		+	+	+	+
Micractinium conductrix	GCA_002245815.2	+	+			+	+	+		+	+	+	+	+	+	+	+
Picochlorum sp. SENEW3	GCA_034226945.1	+	+			+	+	+		+	+	+	+	+	+	+	+
Picochlorum sp. BPE23	GCA_025209345.1	+	+			+	+	+		+	+	+	+	+	+	+	+
Picochlorum sp. BPE23	GCA_025209375.1	+	+			+	+	+		+	+	+	+	+	+	+	+
Auxenochlorella protothecoides	GCA_003709365.1	+				+		+		+	+	+		+	+	+	+
Helicosporidium sp. ATCC 50920	GCA_000690575.1	+				+		+		+	+	+		+	+	+	+
Prototheca wickerhamii	GCA_031763795.1	+				+		+		+	+	+		+	+	+	+
Elliptochloris bilobata	GCA_040144335.1	+				+		+		+	+	+		+	+	+	+
Coccomyxa arvernensis	SAMC4847389	+				+		+		+	+	+		+	+	+	+
Coccomyxa simplex	SAMC4847391	+		+	+	+		+	+	+	+	+		+	+	+	+
Coccomyxa subellipsoidea	GCA_040182555.1	+				+		+		+	+	+		+	+	+	+
Coccomyxa rayssiae	SAMC4847390	+		+	+	+		+	+	+	+	+		+	+	+	+
Coccomyxa viridis	GCA_963575595.1	+				+		+		+	+	+		+	+	+	+
Coccomyxa viridis	GCA_964019345.1	+	+			+	+	+		+	+	+	+	+	+	+	+
Coccomyxa elongata	GCA_964261555.1	+	+			+	+	+		+	+	+	+	+	+	+	+
Coccomyxa subellipsoidea C-169	GCF_000258705.1	+				+		+		+	+	+		+	+	+	+
Coccomyxa sp. Obi	GCA_020887355.1	+	+			+	+	+		+	+	+	+	+	+	+	+
[Myrmecia] bisecta	GCA_040144395.1	+				+		+		+	+	+		+	+	+	+
Symbiochloris irregularis	GCA_040144405.1	+				+		+		+	+	+		+	+	+	+
Trebouxia sp. A1-2	GCA_008636185.1	+				+		+		+	+	+		+	+	+	+
Trebouxia sp. C0004	GCA_040206735.1	+				+		+		+	+	+		+	+	+	+
Trebouxia sp. C0006	GCA_040206745.1	+				+		+		+	+	+		+	+	+	+
Trebouxia sp. C0005	GCA_040206755.1	+				+		+		+	+	+		+	+	+	+
